# Supplementary material for: Screening of Key Proteins Affecting Floral Initiation of Saffron Under Cold Stress Using iTRAQ-Based Proteomics
Source: Front Plant Sci. 2021 May 11;12:644934. doi: 10.3389/fpls.2021.644934 (PMC8144468; doi:10.3389/fpls.2021.644934)
Supplement: Supplementary file 8 [file Table_1.xls]

## Sheet: Tube template
Table S1. Specific primers used in this study
Unigene	Forward primer	Reverse primer	Product length
PB.36509.3|m.13842	GGAGGAGCAGGATGCTTCAAT	CAGGCTTCCTGCTTGTGTAGC	160bp
PB.43424.8|m.67369	CCGTATGCCAGATGGTCGAC	CCTGGTGTGCCTGAGACCAC	211bp
PB.42723.2|m.17343	GCTGCGACCACTGAACCTCT	GGTCGCTCTGGCAAGAGTGA	167bp
PB.74530.1|m.15978	GCGCGATCACCTGCAACA	GCTAGCGAGTGCCACGTTCT	212bp
PB.62685.1|m.5798	TGGGCAAGCTCCTACACTCAC	TCCTCCGTGGAGGAGGACAG	153bp
PB.52694.2|m.74526	CCCAATGGGAATGGAGATGAG	GCCGATAGGGCTGACATGGT	211bp
PB.32779.1|m.19653	TGGCGATCAAGCGGTTCTAC	CCAGCACGTTCACCTTGCTC	135bp
PB.8416.3|m.20381	TGGGACCACAACTGCATCTGT	CTGCCACAAGCCCTTGTACAG	128bp
PB.10719.2|m.33441	AGGGTGGATCGCATCGACAT	TCGGCCTGCTGTTAGCAATC	202bp
PB.34450.1|m.24905	TCTGGCTGCTCTGGAAGCTC	AGGGCAGTGTGCCAATCATT	108bp
PB.425.38|m.170127	CTCCCGAGGAGGGTTGAAAC	CGGTCGAGGTTCGAGACGTA	117bp
PB.33059.2|m.5150	GGCCCATAAGATGATAGCTGGA	GTCCACCAGTGGATGAGACCA	125bp
PB.229.41|m.137985	TGCCTCCATGGGTAGCTCTTG	GCGGATAGGTGACGGTTAAGG	259bp
PB.23022.16|m.151042	GCGCTTGGTTGGGATGAAG	TTGTGGCAAGCTTGCTCTCC	211bp
PB.17182.20|m.162522	GACGGTGTGACGTCAATGATGT	ATCCCGCTGACATCTTCACCT	182bp
PB.11585.3|m.159774	CCGCACATATGGTGCATGTG	TCCCAGCCTTCTGGTTTCAAC	280bp
PB.42784.4|m.70714	GGCAATGAAGGTTGACACCAC	GTTGCACCAGGAATCACTTCG	174bp
PB.42470.2|m.97279	AGGTCCTTGCAGCCACTCAG	CTGGCACGCAAGACACTGTG	225bp
PB.1878.6|m.104960	TGGTGGGCAGGGATGGTATT	TCCGGTGCAGGTTGTCCACT	163bp
PB.62862.1|m.30914	GGCGAGCTCCAGACCGTAAC	AAGCCAGGGAGGTGCTTCTG	113bp
PB.58660.2|m.66725	GGATGGCACGGTGCTGAGT	CGGGATTGTCCGATCGTGT	207bp
U35121#	CACTATCCGAGACAAGATTATC	TCTTCGTCATCCTCATCCT	195bp
U39845#	CACTATCCGAGACAAGATTATC	CCTCTTCGTCCTCATCCT	186bp
Tublin	CGTGCGTTTGTTCACTGGTA	CCCACCTCTTCGTAATCCTTC	104bp
Note:# Reference genes which were proved to be expressed stably in different tissues and stages in our previous work (data unpublished).
