# Supplementary material for: Screening of Key Proteins Affecting Floral Initiation of Saffron Under Cold Stress Using iTRAQ-Based Proteomics
Source: Front Plant Sci. 2021 May 11;12:644934. doi: 10.3389/fpls.2021.644934 (PMC8144468; doi:10.3389/fpls.2021.644934)
Supplement: Supplementary file 9 [file Table_2.XLSX]

## Sheet: Sheet1
Table S2 Summary of totally identified proteins
Sample Name	Total Spectra	Matched Spectra	Peptide	Unique Peptide	Protein
Crocus_sativus	836841	41081	20130	13943	5624
