# Supplementary material for: Screening of Key Proteins Affecting Floral Initiation of Saffron Under Cold Stress Using iTRAQ-Based Proteomics
Source: Front Plant Sci. 2021 May 11;12:644934. doi: 10.3389/fpls.2021.644934 (PMC8144468; doi:10.3389/fpls.2021.644934)
Supplement: Supplementary file 11 [file Table_4.xls]

## Sheet: flower-VS-non-flower_Up
Table S4. List of DAPs detailed annotation in present work.
No.	Protein ID	Description	Mass	Protein Coverage	Uniq Pep Num#	Uniq Spec Num*	Sameset	Mean Ratio flower-VS-non-flower	Ratio flower-VS-non-flower	SD flower-VS-non-flower	Quant Num flower-VS-non-flower★	Qvalue flower-VS-non-flower▲	Protein Sequence	NCBInr Identity	NCBInr E-value	NCBInr Accession	NCBInr Description	Swissprot Identity	Swissprot E-value	Swissprot Accession	Swissprot Description	Protein or Domain	KOG Score	KOG E-value	KOG ID	KOG Function-Description	KOG Code	KOG Function-Categories	KEGG(ko id|rank|evalue|score|subject id|ko definition)	GO Biological Process	GO Molecular Function	GO Cellular Component
4	PB.74947.1|m.32325	type:likely-NA len:126 strand:+ pos:2-379	14334.1	0.368	1	4	-	1.13	1.392|0.817|1.194	0.292	4|4|4	0.043|0.884|0.390	QQKPLHQSSVRPSSHSFISDPMAEEKHHFFHHEHKEETHLEQEKHHKKKEHLGEMEVAAAGAFALYEKHQAKKDPEHAHKHKIEEEIAAAAAVAGGGYAFHEKHETKEQKNEAKSSGEKKHHHLF	77.333	1e-28	ACZ60129.1	abscisic stress ripening [Musa acuminata AAA Group]	69.35	4e-14	sp|P37219|ASR2_SOLLC	Abscisic stress-ripening protein 2 OS=Solanum lycopersicum GN=ASR2 PE=4 SV=1	-	-	-	-	-	-	-	-	GO:0006950//response to stress	-	-
81	PB.46255.5|m.194415	type:confident-5partial len:239 strand:+ pos:3-719	27150.2	0.277	6	9	PB.46255.2|m.59034;PB.46255.4|m.96513;PB.46255.3|m.75312;PB.46255.4|m.96514	1.18	1.436|1.000|1.106	0.227	8|9|9	0.007|1.000|0.465	LKDKFNSVADELNIVPGVWSYNIYLKALCRSGDIVVARDLLDKMPEPDIVSYNTVLDGYVRLWEEAGFEEMLRLIKTKGLEVNVVTYNLRIKMLCRKKESFKGEELLDVMVSKGVDPNLTSFHTLIDGFCHEGDVDSAVRVFKRMKETKKVPGSDTYVVLIRSLVEKEEFGVAFEYCKECLVRRFAPPFEVVKGLIEGLVKSGKEGEAKEIVVKMDDVVRGDAVEAWKKIKAELPLSG	56.574	3e-91	XP_008777842.1	PREDICTED: pentatricopeptide repeat-containing protein At1g61870, mitochondrial-like [Phoenix dactylifera]	32.3	6e-35	sp|Q8LE47|PPR87_ARATH	Pentatricopeptide repeat-containing protein At1g61870, mitochondrial OS=Arabidopsis thaliana GN=PPR336 PE=2 SV=2	At1g61870	128	1e-34	KOG4197	FOG: PPR repeat	R	General function prediction only	K20291|1|1e-32|127|cpap:110806881|conserved oligomeric Golgi complex subunit 4!K17710|3|2e-30|122|gmx:102663208|pentatricopeptide repeat domain-containing protein 1	-	-	-
113	PB.47796.16|m.74405	type:likely-NA len:361 strand:+ pos:62-1144	40118.3	0.322	9	13	PB.47796.1|m.2279;PB.47796.3|m.3383	1.13	1.325|1.012|1.057	0.169	13|13|12	0.043|0.987|0.830	MSTVRLLLAGTVVAVAVYCAVDPFGHSPMAQFPVFETYGVTYSSSITSKEISKAGDPQNLLQKAEVRFLNQVQGPESVAFDPQGRGPYTGIADGRIVFWDGQSWSDFAYTSANRSEICDPKPSPLSYLKNEHICGRPLGLRFDKKTGDLYIADAYFGLLKVGPEGGLATLLTNEAEGVPFNFTNDLDIDEEGNIYFTDSSTNFQRRNFMQLVFTGEPSGRLLKFNPVTKETTVLIRDLQSPNGVSLSKDGSFLLFSECSIGRLTRFWIKGEKAGTSEVFVVLPGFPDNIRTNEKGEFWVAIHCRHSKYSHFMGLWPRVRKFILKLPIKGQVSLHAASRRPASRNDHEVRSGWRGAGGAGR	77.143	0	XP_009412315.1	PREDICTED: protein STRICTOSIDINE SYNTHASE-LIKE 3 [Musa acuminata subsp. malaccensis]	67.29	5e-167	sp|Q8VWF6|SSL3_ARATH	Protein STRICTOSIDINE SYNTHASE-LIKE 3 OS=Arabidopsis thaliana GN=SSL3 PE=2 SV=1	At1g08470	471	9e-167	KOG1520	Predicted alkaloid synthase/Surface mucin Hemomucin	R	General function prediction only	K21407|1|0.0|516|mus:103993841|adipocyte plasma membrane-associated protein	GO:0009058//biosynthetic process	GO:0016844//strictosidine synthase activity	-
299	PB.16019.4|m.68233	type:confident-5partial len:365 strand:+ pos:1-1095	43232	0.102	3	4	PB.16019.3|m.15203;PB.16019.5|m.75843;PB.16019.6|m.109589;PB.16019.9|m.157472;PB.16019.1|m.4893;PB.16019.2|m.14533;PB.16019.8|m.125909	1.24	1.544|1.297|0.885	0.333	3|4|3	0.028|0.621|0.663	DVLRRKIVMLFISDLDVSHEELFILIQLYNDTHQGKLERNYEIVWLPIIDRYVPWTPGKQEVYDRLASTMPWYSLQDPLLLDQAVIKYVRDVWRFDTKPILVVLDPQGKVVCPNALHMMWIWGSLAFPFTSNREEALWREETWRLEFLVDEIDQTILTWVREGRYVCLYGGEDIDWIRRFTTLLRRVSQEARLPLEMIYVGKSNPKERVKKAIATVAAEKLSGYWEDPVMVWFFWVRLESMWHSKRQHGKSIENDPIMQEVMAMLSFDGSDEGWAVISRGSVEIVKANGKKLIDCLMQFDTWKESAQQEGFVPALTNALVPYHTHEHCTRLILPGDTGRIKEQVVCAECKRPMEKFVLYRCCND	84.341	0	XP_020253299.1	protein SIEVE ELEMENT OCCLUSION B [Asparagus officinalis]	40.36	1e-98	sp|Q9SS87|SEOB_ARATH	Protein SIEVE ELEMENT OCCLUSION B OS=Arabidopsis thaliana GN=SEOB PE=1 SV=1	-	-	-	-	-	-	-	K17609|1|8e-08|58.5|bvg:104897381|nucleoredoxin [EC:1.8.1.8]	-	-	-
322	PB.8322.7|m.32545	type:confident-5partial len:117 strand:+ pos:3-353	12202	0.517	4	16	PB.70518.2|m.184469;PB.72221.1|m.38991;PB.61805.1|m.210439	1.58	1.963|1.491|1.282	0.349	16|13|14	0.011|0.030|0.270	SPSCSVLYPGDRCLPLHLLPRAESAVTCSSVASAISPCLGYIRGQGALTGSCCSGVKGLAAAANTPISRRTACNCLKSMAGRISGLNPNLAKGLPGKCGASVPYVISTSTDCTRVV	85.556	2e-47	ADB12472.1	lipid transfer protein, partial [Crocus sativus]	56.04	2e-31	sp|Q9M5X7|NLTP_MALDO	Non-specific lipid-transfer protein OS=Malus domestica GN=MALD3 PE=1 SV=1	-	-	-	-	-	-	-	-	GO:0006869//lipid transport	GO:0008289//lipid binding	GO:0016021//integral component of membrane
376	PB.41136.6|m.109460	type:confident-complete len:197 strand:+ pos:1197-1787	21792.6	0.367	6	14	PB.71826.1|m.26907;PB.67780.1|m.210854;PB.41136.4|m.35346;PB.71826.2|m.30678;PB.71826.3|m.35009;PB.41136.10|m.197512	1.05	1.223|0.890|1.049	0.167	14|14|12	0.011|0.697|0.690	MATEATDVKLFNRWAFDEVSVTDISLADYIGVVPGRHSTFLPHTAGRYSVKRFPKAQCPIVERLTNSLMMHGRNNGKKLMAVRIVKHAMELIHLLTDLNPIQVIVDAVINSGPREDATRIGSAGVVRRQAVDISPLRRVNQALYLITTGARESSFRNVKTIAECLADELINAAKGSSNSYAIKKKDEIERVAKANR	90.526	4e-130	XP_018851128.1	PREDICTED: 40S ribosomal protein S5 [Juglans regia]	88.95	9e-131	sp|Q9ZUT9|RS51_ARATH	40S ribosomal protein S5-1 OS=Arabidopsis thaliana GN=RPS5A PE=1 SV=1	At2g37270	365	2e-130	KOG3291	Ribosomal protein S7	J	Translation, ribosomal structure and biogenesis	K02989|1|6e-131|369|jre:109013482|small subunit ribosomal protein S5e	GO:0006412//translation	GO:0003735//structural constituent of ribosome;GO:0003723//RNA binding	GO:0015935//small ribosomal subunit
436	PB.63129.2|m.36550	type:suspicious-NA len:104 strand:+ pos:645-956	10885.5	0.417	1	5	-	1.02	1.376|0.702|0.991	0.338	5|4|4	0.022|0.085|0.976	MSDPSGNYGGWKAAAIGANNQAAQSMLKQDYKEDITREEAVQLALKVLSKTMDSTSLTAEKLELAQVHLLPSGSVKYEVCSPDALGKLLVKSGVTQPAAAETS	90.909	7e-59	EOX96833.1	20S proteasome alpha subunit C1 isoform 1 [Theobroma cacao]	80.58	1e-54	sp|P52427|PSA4_SPIOL	Proteasome subunit alpha type-4 OS=Spinacia oleracea GN=PAC1 PE=2 SV=1	At3g22110	168	1e-53	KOG0178	20S proteasome, regulatory subunit alpha type PSMA4/PRE9	O	Posttranslational modification, protein turnover, chaperones	K02728|1|3e-59|185|aof:109845084|20S proteasome subunit alpha 3 [EC:3.4.25.1]	GO:0006511//ubiquitin-dependent protein catabolic process	GO:0004298//threonine-type endopeptidase activity	GO:0005737//cytoplasm;GO:0019773//proteasome core complex, alpha-subunit complex;GO:0005634//nucleus
476	PB.40409.3|m.99138	type:suspicious-NA len:188 strand:+ pos:1300-1863	20845	0.417	2	4	-	1.33	1.772|0.985|1.243	0.401	5|5|6	0.007|0.985|0.389	MGVPPEEGQLISILLKLMNAKKTIEIGVFTGYSLLTTALALPEDGKITAIDIDRTAYEIGLPFIKEAGVEHKIDFIESPAIPILDKLLKEVKEDELFDFAFVDADKPGYRGYYERLLKLVKVGGVIAFDNTLWLGSVATPEDPSHHPKLREGMNILIEFNKFLGSDSRIEVSQLAIGDGLTICRRRC	72.973	1e-97	XP_010905194.1	PREDICTED: caffeoyl-CoA O-methyltransferase-like isoform X1 [Elaeis guineensis]	65.03	4e-88	sp|A0A077EWA5|NOMT_NARAP	Norbelladine 4'-O-methyltransferase OS=Narcissus aff. pseudonarcissus MK-2014 GN=N4OMT PE=1 SV=1	At1g67980	239	3e-80	KOG1663	O-methyltransferase	Q	Secondary metabolites biosynthesis, transport and catabolism	K21311|1|2e-98|288|egu:105032438|norbelladine O-methyltransferase [EC:2.1.1.336]!K00588|3|5e-91|269|egu:105032439|caffeoyl-CoA O-methyltransferase [EC:2.1.1.104]	-	-	-
550	PB.36961.5|m.67768	type:suspicious-NA len:182 strand:+ pos:401-946	20991.6	0.453	2	4	-	1.22	1.724|1.096|0.853	0.449	4|4|4	0.018|0.868|0.681	MVGFAPLTSRGSQQYRALTVPELTQQMWDAKNMMCAADPRHGRYLTASAMFRGKMSTKEVDEQMINVQNKNSSYFVEWIPNNVKSTVCDIPPTGLKMASTFIGNSTSIQEMFRRVSEQFTAMFRRKAFLHWYTGEGMDEMEFTEAESNMNDLVSEYQQYQDATADEEGDYQDEEEAEYQEE	98.333	2e-129	XP_010934750.1	PREDICTED: tubulin beta-2 chain [Elaeis guineensis]	92.82	2e-124	sp|Q9ZPN9|TBB2_ELEIN	Tubulin beta-2 chain OS=Eleusine indica GN=TUBB2 PE=2 SV=1	At2g29550	347	9e-120	KOG1375	Beta tubulin	Z	Cytoskeleton	K07375|1|3e-130|376|egu:105054836|tubulin beta	GO:0007017//microtubule-based process	GO:0003924//GTPase activity;GO:0005200//structural constituent of cytoskeleton;GO:0005525//GTP binding	GO:0005737//cytoplasm;GO:0005874//microtubule
556	PB.42503.1|m.5539	type:likely-NA len:475 strand:+ pos:3-1427	52556.6	0.563	2	21	PB.42503.4|m.22398	1.04	1.211|0.960|0.943	0.15	20|21|21	0.007|0.883|0.652	REYKVKDMSQADFGRLEIELAEVEMPGLISCRTEFGPSQPFAGARITGSLHMTIQTAVLIETLTALGAEVRWCSCNIFSTQDHAAAAIARDSAAVFAWKGETLAEYWWCTERALDWGPGGGPDLIVDDGGDATLLIHEGVKAEEEFEKSGKVPDPASTDNAEFQIVLTIIRDGLKVDPTKYRKMRERIVGVSEETTTGVKRLYQMQASGTLLFPAINVNDSVTKSKFDNLYGCRHSLPDGLMRATDVMIAGKVAVVAGYGDVGKGCAAALKQAGARVIVTEIDPICAFQALMEGLQVLTLEDVVSEADIFVTTTGNKDIIMVDHMRKMKNNAIVCNIGHFDNEIDMQGLETYPGVQRITIKPQTDRWVFPETKTGIIVLAEGRLMNLGCATGHPSFVMS…	92.405	0	XP_008794647.1	PREDICTED: adenosylhomocysteinase-like [Phoenix dactylifera]	90.08	0	sp|Q01781|SAHH_PETCR	Adenosylhomocysteinase OS=Petroselinum crispum GN=SAHH PE=2 SV=2	At4g13940	893	0	KOG1370	S-adenosylhomocysteine hydrolase	H	Coenzyme transport and metabolism	K01251|1|0.0|924|pda:103710610|adenosylhomocysteinase [EC:3.3.1.1]	GO:0006730//one-carbon metabolic process;GO:0019510//S-adenosylhomocysteine catabolic process	GO:0051287//NAD binding;GO:0004013//adenosylhomocysteinase activity	-
576	PB.44899.2|m.23660	type:confident-5partial len:204 strand:+ pos:2-613	22615.5	0.3	3	7	-	1.18	1.531|0.954|1.055	0.308	5|6|7	0.007|0.873|0.898	DATDAMYDFGRKIREGLGSDSAGIAKVITQDCGYLFRGAKTLVEVGGGTGTIALAIADAFPEVKCTVFDLPHTIDALDKSDKVAYVGGRMFEHIPPADILLLKWVCQCWSDEECIALLKRCKEATPSKENGGKVIIIDKVIDTEGVNSKLAQIQLHFDIHIMVHTTGKQRTEDEWKKLFTEAGFKGYNIVSALGSRSIIEIYH	70.098	4e-102	XP_020247521.1	trans-resveratrol di-O-methyltransferase-like isoform X2 [Asparagus officinalis]	47.94	3e-64	sp|B6VJS4|ROMT_VITVI	Trans-resveratrol di-O-methyltransferase OS=Vitis vinifera GN=ROMT PE=1 SV=2	At4g35150	133	2e-37	KOG3178	Hydroxyindole-O-methyltransferase and related SAM-dependent methyltransferases	R	General function prediction only	K16040|1|4e-79|244|egu:105044075|trans-resveratrol di-O-methyltransferase [EC:2.1.1.240]	-	-	-
585	PB.35913.9|m.55921	type:confident-5partial len:268 strand:+ pos:3-806	30117.7	0.262	2	4	-	1.62	2.247|0.842|1.785	0.716	4|3|3	0.102|0.660|0.037	TLPHSQNGPQTRNPNPVPPEYGRDDPSVAIAGGLVPSSDPDRGQQLPVHGLPGNPAQLRARRPPERRLLPQHPDPPLLPRPEPPLVRPDLGPDRLRPFLRPPRLLHRRLRRPPRVLRRRRGPALHPRPAVPPPRRRGPPRPLLLRRQPRRRLQRAGDGDAARGEGRCPVVGCREDLLATCPDVLRVRAGGATAGAGAVVGCKSGCAAFGTDELCCRNMYNSPRTCRASKFSEFFKSKCPDTFTYAHDSPTLTHECSSPKELKVIFCH	80.189	9e-55	XP_009388624.1	PREDICTED: osmotin-like protein [Musa acuminata subsp. malaccensis]	66.98	3e-45	sp|Q41350|OLP1_SOLLC	Osmotin-like protein OS=Solanum lycopersicum PE=1 SV=1	-	-	-	-	-	-	-	K04733|1|1e-16|84.0|pop:7463623|interleukin-1 receptor-associated kinase 4 [EC:2.7.11.1]	-	-	-
602	PB.43424.8|m.67369	type:dumb-3partial len:400 strand:+ pos:89-1288	45334.5	0.247	8	10	PB.43424.12|m.87893;PB.43424.3|m.15306;PB.43424.11|m.82553;PB.43424.1|m.3483;PB.43424.2|m.12976;PB.43424.14|m.88906	1.1	1.285|1.060|0.957	0.168	10|9|10	0.007|0.744|0.889	MAAVIAAAGAPLRTRQGQNRTMDDENLVFETSAGVEAITSFDQMGIRDDLLRGIYAYGFEKPSAIQQRAVMPIVSGRDVIAQAQSGTGKTSMIALSVCQMVDTTSREVQALILSPTRELASQTEKVILAIGDYINIQAHSCVGGKSIGEDIRKLEYGVHVVSGTPGRVCDMIKRRTLRTRSIKLLVLDESDEMLSRGFKDQIYDVYRYLPPELQVVLISATLPHEILEITSKFMSDPVRILVKRDELTLEGIKQFFVAVEREEWKFDTLTDPYDTLTITQAVIFCNTKRKVDWLTEKMRSNNFTVSAMHGDMPQKERDAIMAEFRSGATRVLITTDVWARGLDVQQVSLVINYDLPNNRELYIHRIGRSGRFGRKGVAINFVRKDDIRILRDIEQYYSTQ	94.177	0	XP_020241780.1	eukaryotic initiation factor 4A-3 [Asparagus officinalis]	89.29	0	sp|Q10I26|IF43B_ORYSJ	Eukaryotic initiation factor 4A-III homolog B OS=Oryza sativa subsp. japonica GN=EIF4A3B PE=1 SV=1	At3g19760	697	0	KOG0328	Predicted ATP-dependent RNA helicase FAL1, involved in rRNA maturation, DEAD-box superfamily	J	Translation, ribosomal structure and biogenesis	K13025|1|0.0|776|aof:109820115|ATP-dependent RNA helicase [EC:3.6.4.13]	-	-	-
619	PB.44513.3|m.82378	type:confident-complete len:449 strand:+ pos:59-1405	51012.1	0.364	2	4	-	1.1	1.478|0.997|0.839	0.333	4|3|3	0.043|0.996|0.462	MRVILHVQGGQCGNQIGSKFWEVVCDEHGIDPTGRYIGTSDLQLERVNVYYNEASCGRFVPRAVLMDLEPGTMDSVRTGPYGQIFRPDNFVFGQSGAGNNWAKGHYTGGAELIDSVLDVVRKEAENCDCLQGFQVCHSLGGGTGSGMGTLLISKVREEYPDRMMLTFSVFPSPKVSDTVVEPYNATLSVHQLVENADECMVLDNEALYDICFRTLKLTTPSFGDLNHLISATMSGVTCCLRFPGQLNSDLRKLAVNLIPFPRLHFFMVGFAPLTSRGSQQYRSLTVPELTQQMWDSKNMMCAADPRHGRYLTASAMFRGKMSTKEVDEQMINVQNKNSSYFVEWIPNNVKSSVCDIAPRGLSMASTFIGNSTSIQEMFRRVSEQFTAMFRRKAFLHWYT…	95.964	0	XP_004962088.1	PREDICTED: tubulin beta-2 chain [Setaria italica]	95.76	0	sp|Q9ZPN9|TBB2_ELEIN	Tubulin beta-2 chain OS=Eleusine indica GN=TUBB2 PE=2 SV=1	At5g12250	863	0	KOG1375	Beta tubulin	Z	Cytoskeleton	K07375|1|0.0|880|sita:101776854|tubulin beta	GO:0007017//microtubule-based process	GO:0003924//GTPase activity;GO:0005200//structural constituent of cytoskeleton;GO:0005525//GTP binding	GO:0005737//cytoplasm;GO:0005874//microtubule
703	PB.46318.1|m.11959	type:confident-complete len:450 strand:+ pos:52-1401	49703.2	0.209	4	9	-	1.09	1.225|1.048|0.992	0.122	18|18|17	0.018|0.939|0.973	MASDSTFTLPSFTLQELPSLSPPQTFYTNPLEKSPYYHPQPTFYISPSDVILRHILFDLPSLPPQLLAYHRAGPRRSIHFDPSHVRAAIVTCGGLCPGMNTVTRELVVGLWELYGVREIFGIPSGYRGFYKDDPVRLDPKMVSDWHKRGGTALATSRGGFDLEKIVGAIVARGFNQVYCIGGDGTMRGAVKIFKEVQRLQLNVSITGIPKTVDNDIGIIDRSFGFQTAVEMAMQAINAAHVEAESAVNGIGLVKLMGRSTGHIALHATLSSRDVDCCLIPEMDFFLEGKGGLFEFLGQRLKQNGHAVVVVAEGAGQGIIPRTDAQKEERDESGNLVFLDVGPWIKSELKRWWERDHEGELLTVKYIDPTYMVRAVPANATDNLYCTLLAHSAIHGVMAG…	83.073	0	XP_010942916.1	PREDICTED: ATP-dependent 6-phosphofructokinase 2-like [Elaeis guineensis]	76.2	0	sp|Q9FIK0|PFKA2_ARATH	ATP-dependent 6-phosphofructokinase 2 OS=Arabidopsis thaliana GN=PFK2 PE=1 SV=1	At5g47810	696	0	KOG2440	Pyrophosphate-dependent phosphofructo-1-kinase	G	Carbohydrate transport and metabolism	K00850|1|0.0|775|egu:105060774|6-phosphofructokinase 1 [EC:2.7.1.11]	GO:0006002//fructose 6-phosphate metabolic process	GO:0003872//6-phosphofructokinase activity;GO:0046872//metal ion binding;GO:0005524//ATP binding	GO:0005737//cytoplasm
714	PB.38978.3|m.196362	type:confident-complete len:186 strand:+ pos:85-642	20924.1	0.168	2	3	PB.38978.1|m.51583;PB.64033.1|m.210525	1.45	1.991|1.066|1.304	0.48	3|3|3	0.007|0.984|0.576	MMMSSQQLQNQQELQKNTLYVGGLSEEVNESILHSAFIPFGDIKDVKTPLDQATQKHRSFGFVTFLEREDAAAAMDNMDGAELYGRVLTVNYALPERIKGGEQGWAAQPIWADADTWFERQQQEEEMQRLQKENRAAMEAAEELHRKKLAEQQEGEKDEEETTNMKGGSDDPMAIVDSEALKQVS	83.721	2e-102	XP_009612682.1	PREDICTED: peptidyl-prolyl cis-trans isomerase E [Nicotiana tomentosiformis]	36.96	2e-16	sp|Q9FNR1|RBG3_ARATH	Glycine-rich RNA-binding protein 3, mitochondrial OS=Arabidopsis thaliana GN=RBG3 PE=1 SV=1	At1g13690	274	4e-95	KOG0111	Cyclophilin-type peptidyl-prolyl cis-trans isomerase	O	Posttranslational modification, protein turnover, chaperones	K09564|1|6e-104|299|lsv:111879049|peptidyl-prolyl isomerase E (cyclophilin E) [EC:5.2.1.8]		GO:0003723//RNA binding;GO:0003755//peptidyl-prolyl cis-trans isomerase activity	-
764	PB.70184.4|m.181992	type:confident-5partial len:81 strand:+ pos:3-245	9152.25	0.25	2	2	PB.70184.5|m.185188;PB.70184.3|m.36582;PB.70184.6|m.197222;PB.70184.1|m.27366;PB.70184.2|m.31648	1.64	3.070|1.052|0.797	1.245	2|2|2	0.011|0.977|0.583	KQVRGEWKTRNENMARNCGEARDLMSRFKSCDVDYVPRGYNSAADGEANKAVNLPDGEVYKESTSRHSGGRYGGRYDGYY	68.852	3e-23	XP_020259948.1	uncharacterized protein LOC109836463 [Asparagus officinalis]	-	-	-	-	-	-	-	-	-	-	-	-	-	-	-
778	PB.55408.3|m.52538	type:confident-5partial len:319 strand:+ pos:3-959	35251.9	0.519	14	337	-	1.04	0.699|1.263|1.148	0.298	325|327|328	0.007|0.030|0.033	EQSKTKSWLLDSLLSSFSLSTLLLLSPSAPSTLSNLLLLPPRAPSTLFVEYIGSEFTGVEFADVPINRRITNFQFVLSFATDYTTSFPHNPTSGKFNVFWDSDTLGPTQISAVKYSHRNVQVAVSLGGATVGGKTVEFQPTSIDLWVSNAVSSLTRIIHSYGLDGIDINYQSFQYTDPSTFAECIGQLVTTLKRNGVIRFASISPLPKAEKYYLELWNQYKNVIDQINFQFYAYPATTTVDQFLGYYDSAVLTYKGGNMLISFSTEPEGGGLGAKDFMEAAEKIKAEGELRGIAVWTADTSKRNRFRYDEEAQALLVS	55.435	3e-108	XP_020092390.1	chitinase 2-like [Ananas comosus]	50.18	1e-94	sp|Q7M443|CHIT2_TULBA	Chitinase 2 OS=Tulipa bakeri PE=1 SV=1	-	-	-	-	-	-	-	-	GO:0005975//carbohydrate metabolic process;GO:0006032//chitin catabolic process	GO:0008061//chitin binding;GO:0004553//hydrolase activity, hydrolyzing O-glycosyl compounds;GO:0004568//chitinase activity	GO:0005576//extracellular region
896	PB.25600.1|m.196	type:confident-5partial len:310 strand:+ pos:2-931	34347.9	0.227	4	5	PB.25600.2|m.16258	1.18	1.383|1.277|0.885	0.262	4|5|4	0.043|0.732|0.519	INYQPEVMLNFLKEFETKLDIKITCSQETEPLGTAGPLALARDKLIDGSGEPFFVLNSDVISEYPFAELINFHKIHGGEATIMVTKVDEPSKYGVVVMEEETGKVDRFVEKPKIFVGNKVNAGIYLLNPSVLDRIQLRPTSIEKEIFPQIAGDQKLFAMVLPGFWMDIGQPRDYITGLRLYLDSLRKKLSPKLAAGYHIVGNVLVHETAVIGEGCLIGPDVAIGSGCVVEAGVRLSRCTVMRGVRIKKHACVSGSIIGWHSTVGQWARVENMTILGEDVHVCDEIYSNGGVVLPHKEIKSSILKPEIVM	92.233	0	XP_008777609.1	PREDICTED: probable mannose-1-phosphate guanylyltransferase 1 [Phoenix dactylifera]	89	0	sp|Q84JH5|GMPP1_ORYSJ	Probable mannose-1-phosphate guanylyltransferase 1 OS=Oryza sativa subsp. japonica GN=Os03g0268400 PE=2 SV=1	At2g39770	563	0	KOG1322	GDP-mannose pyrophosphorylase/mannose-1-phosphate guanylyltransferase	M	Cell wall/membrane/envelope biogenesis	K00966|1|0.0|594|pda:103697513|mannose-1-phosphate guanylyltransferase [EC:2.7.7.13]	GO:0009058//biosynthetic process	GO:0016779//nucleotidyltransferase activity	-
951	PB.24543.20|m.102744	type:confident-complete len:484 strand:- pos:172-1623	54070.6	0.445	16	34	PB.24543.6|m.22660;PB.24543.1|m.1548;PB.24543.23|m.107873	1.12	1.302|1.001|1.054	0.161	33|34|30	0.007|0.996|0.518	MDKMLQSPDGEVTITNDGATILEQMDVDNQIAKLLVELSRSQDYEIGDGTTGVVVMAGALLEQAEKLLERGIHPIRVAEGYEMASRIAVDHLEHISQKFDFSINNMESLVQVCMTTLSSKIVNRCKRALAEISVKAVLAVADLERKDVNLDMIKVEGKVGGKLEDTELIYGIIVDKDMSHPQMPKQIENAKIAILTCPFEPPKPKTKHKVDIDTVEKFQTLRQQEQQYFDDMVQKCKDVGATLVICQWGFDDEANHLLMHRNLPAVRWVGGVELELIAIATGGRIVPRFQELTPEKLGKAGLVREKAFGTTKDRMLYIEQCANSRAVTIFIRGGNKMMIEETKRSIHDALCVARNLIRNNSIVYGGGSAEISCSIAVEAAADRYPGVEQYAIRSFAEAL…	93.996	0	XP_008802630.1	PREDICTED: T-complex protein 1 subunit epsilon [Phoenix dactylifera]	88.61	0	sp|O04450|TCPE_ARATH	T-complex protein 1 subunit epsilon OS=Arabidopsis thaliana GN=CCT5 PE=1 SV=1	At1g24510	911	0	KOG0357	Chaperonin complex component, TCP-1 epsilon subunit (CCT5)	O	Posttranslational modification, protein turnover, chaperones	K09497|1|0.0|958|pda:103716426|T-complex protein 1 subunit epsilon	GO:0006457//protein folding	GO:0051082//unfolded protein binding;GO:0005524//ATP binding	GO:0005737//cytoplasm
965	PB.59688.1|m.73107	type:likely-NA len:221 strand:- pos:81-743	25382.7	0.036	1	2	-	1.23	1.774|1.496|0.412	0.72	2|2|2	0.098|0.385|0.037	LIISPLLLPFHSKLPTHFLLDPDAEVVSLSPKTLLSATTFVCEVCGKEFRRDQNLQIHRRGHSLPWKHSPKSPSASAKKRVYVCPEATCVYHEPSRALGDLTGIKKHYSRKHGEKKWECEKCSKKYAVRTDWKAHSRICGNREYECLCGTLFSRKESFLVHKISCEAHTGEATDGEEESRRTVDFGVKANTVNDELLFPSLWGKVSDSKSATEGEESQSK	68.269	7e-101	XP_008805552.1	PREDICTED: protein indeterminate-domain 9-like [Phoenix dactylifera]	58.7	1e-77	sp|Q700D2|IDD10_ARATH	Zinc finger protein JACKDAW OS=Arabidopsis thaliana GN=JKD PE=1 SV=1	At5g03150	239	2e-76	KOG1721	FOG: Zn-finger	R	General function prediction only	K22410|1|2e-76|239|cmos:111464854|PR domain zinc finger protein 16!K12309|3|5e-72|238|lja:Lj3g3v0323160.1|beta-galactosidase [EC:3.2.1.23]		GO:0046872//metal ion binding;GO:0003676//nucleic acid binding	-
988	PB.74419.1|m.36636	type:confident-5partial len:177 strand:+ pos:2-532	19523.7	0.273	5	23	PB.69973.1|m.37516	1.14	1.292|0.906|1.232	0.208	22|22|21	0.007|0.676|0.033	SRNPHPLFFQPQFPFPISTPMAPKGAEKKPAEKKPAAEKPVEEEKEKPAKAEKSPAGKKPKAEKKIPASKDGAKSEKKKKRKAKNVETYKIYIFKVLKQVHPDIGISSKAMGIMNSFINDIFEKLAQESSRLARYNKKPTITSREIQTSVRLVLPGELAKHAVSEGTKAVTKFTSS	86.164	6e-79	XP_020274442.1	histone H2B.11-like [Asparagus officinalis]	83.97	6e-78	sp|O23629|H2B6_ARATH	Histone H2B.6 OS=Arabidopsis thaliana GN=H2B PE=1 SV=3	At3g45980	229	1e-77	KOG1744	Histone H2B	B	Chromatin structure and dynamics	K11252|1|1e-79|237|aof:109849068|histone H2B		GO:0003677//DNA binding;GO:0046982//protein heterodimerization activity	GO:0009534//chloroplast thylakoid;GO:0005730//nucleolus;GO:0009570//chloroplast stroma;GO:0005634//nucleus;GO:0000786//nucleosome
1070	PB.44899.6|m.75488	type:confident-complete len:359 strand:+ pos:10-1086	40122.4	0.263	1	7	-	1.05	1.203|0.924|1.025	0.141	13|12|11	0.018|0.258|0.902	MASTEAVTSQELLEAQSHLWLHIFSFINSLSLKCALELGIPDAVHNHGKPITLTELATALSIPSVRIPNFQRFMRLLVHSGFFTVTTNEANEEDVYALTTNSIPLISERGATIIPFIEVALDESLMLPWQSLSTWFKSEHPSTAFEMAHKKFIWDATDAMPDFGRKIREGLGSDSAMIAKVITEDCGYLLRGAKTLVEVGGGGTGTIALAIADAFPEVKCTVFDLPHMIDGLEKSDKVAYVGGRMFEHIPPADILLRKWVCQCWSDEECITLLKRCKEATPSKENGGKVIIIDKVIDAEGVDSMLALIQLYFDIMMMVHTTGKQRTEDEWKKLFTEAGFKGYNIVPALGLRSIIEIYH	69.081	0	XP_020247521.1	trans-resveratrol di-O-methyltransferase-like isoform X2 [Asparagus officinalis]	46.65	3e-116	sp|B6VJS4|ROMT_VITVI	Trans-resveratrol di-O-methyltransferase OS=Vitis vinifera GN=ROMT PE=1 SV=2	At4g35160	183	3e-54	KOG3178	Hydroxyindole-O-methyltransferase and related SAM-dependent methyltransferases	R	General function prediction only	K16040|1|1e-133|389|egu:105044075|trans-resveratrol di-O-methyltransferase [EC:2.1.1.240]	-	-	-
1086	PB.73253.2|m.179444	type:confident-5partial len:174 strand:+ pos:2-523	18941	0.185	1	1	-	1.26	1.513|1.075|1.196	0.226	3|3|3	0.030|0.913|0.462	EGKGKERSIMLSENNGYNKSRLAIINSHFNPPPPPPPPPLLSMAAASEKEGALSAAPTDGPTIFDKIIKKEIPSTVVYEDDKVLAFRDIDPQAPTHILVIPKVRDGLTGLSKAEERHIEILGCLLYVAKLVAKQEGLKDGYRIVINDGPIGCQSVYHLHLHVIGGRQMNWPPG	75.625	1e-84	XP_017619712.1	PREDICTED: 14 kDa zinc-binding protein [Gossypium arboreum]	74.51	2e-81	sp|Q8GUN2|HINT1_ARATH	Adenylylsulfatase HINT1 OS=Arabidopsis thaliana GN=HINT1 PE=1 SV=1	At3g56490	227	3e-77	KOG3275	Zinc-binding protein of the histidine triad (HIT) family	T	Signal transduction mechanisms	K02503|1|6e-84|248|ghi:107935518|histidine triad (HIT) family protein		GO:0003824//catalytic activity	-
1111	PB.61560.10|m.50648	type:confident-complete len:251 strand:+ pos:64-816	27406.8	0.528	7	16	PB.61560.5|m.43961;PB.61560.18|m.211049;PB.61560.14|m.200039;PB.61560.6|m.45846;PB.61560.15|m.202547;PB.62864.1|m.31926;PB.62864.2|m.38745	1.14	1.286|0.965|1.167	0.162	15|16|16	0.032|0.953|0.060	MGKSYPAVSEEYLKAVDKCKKKLRGFIAEKNCAPLMLRLAWHSAGTFDVKSNTGGPFGTMRHKAELGHGANNGLDIAVRLLEPIKEQFPILSFGDFYQLAGVVAVEVTGGPEVPFHPGRQDKPEPPVEGRLPDATKGCDHLRTVFGVQMGLSDKDIVALSGGHTLGRCHKERSGFEGAWTSNPLIFDNSYFTELLSGEKEGLLQLPSDKALLSDAVFRPLVEKYAADEDAFFADYAEAHMKLSELGFATA	91.6	1e-170	XP_020276942.1	L-ascorbate peroxidase 2, cytosolic [Asparagus officinalis]	84.4	3e-161	sp|P48534|APX1_PEA	L-ascorbate peroxidase, cytosolic OS=Pisum sativum GN=APX1 PE=1 SV=2	-	-	-	-	-	-	-	K00434|1|2e-171|476|aof:109851292|L-ascorbate peroxidase [EC:1.11.1.11]	GO:0006979//response to oxidative stress	GO:0016688//L-ascorbate peroxidase activity;GO:0004601//peroxidase activity;GO:0020037//heme binding	-
1140	PB.50517.9|m.65279	type:suspicious-NA len:394 strand:+ pos:20-1201	43176.3	0.214	6	9	PB.51245.1|m.16726;PB.50517.1|m.262;PB.50517.10|m.78334	1.13	1.208|1.069|1.118	0.071	7|9|9	0.026|0.934|0.443	MGRNWEAEQKTLAETFVGITSSTREEALFFLESHNWELESSIHSFFESQQEVLLPHDNTTTLPPEKKSTLLRRRSPSRRRMMMGSRCDEGRKKKKAALGSGSKIRTLSDLNRGAGSESDTDDDGPQEYYTGGEKSGMIVQDPSKGGHDADSIFDQARQMGAMQGPFEHHPSSSSRSFTGTGRLLSGETVASAPQQPENVVHNIYFWANGFTVNDGPLRRFDDPENAPFLESIRRSECPRELEPEDRRTAVSCNLIRRGENCPEPVKRPSPFHGVGRTLGSGGPSTDSPISELAAPAVTTSSSDAGPLVVDDSLPTTSIQLRLADGTRTVARFNTHHTVGDIRVFIDNLTSSRRGGPPTAYTLQTVGFPPKQLNDPTQSIQQAGLANSVVIQKL	63.66	2e-153	XP_020270875.1	plant UBX domain-containing protein 4-like [Asparagus officinalis]	62.62	6e-119	sp|Q9SUG6|PUX3_ARATH	Plant UBX domain-containing protein 3 OS=Arabidopsis thaliana GN=PUX3 PE=1 SV=1	At4g22150	347	1e-118	KOG2086	Protein tyrosine phosphatase SHP1/Cofactor for p97 ATPase-mediated vesicle membrane fusion	Y	Nuclear structure	K14012|1|3e-154|444|aof:109846059|UBX domain-containing protein 1	-	-	-
1146	PB.70353.1|m.26079	type:suspicious-NA len:91 strand:+ pos:351-623	10031.5	0.133	1	1	PB.42484.6|m.93786;PB.36081.4|m.181903;PB.42906.4|m.184934;PB.36081.5|m.195207;PB.42484.8|m.210698;PB.36081.6|m.214117;PB.42906.1|m.50878;PB.42484.7|m.204952;PB.42906.2|m.70037;PB.36081.2|m.88384;PB.36081.1|m.62146;PB.36081.3|m.121753;PB.42906.3|m.97835;PB.42484.1|m.24289;PB.42484.2|m.65675;PB.42484.4|m.91338	1.13	0.128|0.982|2.266	1.076	1|1|1	0.018|0.992|0.288	MLDSRAELLRPFTVTNTLGLWDVTSTVKGGGTTGQAGAVRLGISRALENWEPGLRKYLKPVGFLTRDSRIVERKKPGKAKARKSFQWVKR	83.333	2e-48	EMT06369.1	30S ribosomal protein S9 [Aegilops tauschii]	51.25	1e-19	sp|A0T0K2|RR9_PHATC	30S ribosomal protein S9, chloroplastic OS=Phaeodactylum tricornutum (strain CCAP 1055/1) GN=rps9 PE=3 SV=1	At3g49080	142	6e-45	KOG1697	Mitochondrial/chloroplast ribosomal protein S9	J	Translation, ribosomal structure and biogenesis	K02996|1|9e-48|160|pda:103703492|small subunit ribosomal protein S9	GO:0006412//translation	GO:0003735//structural constituent of ribosome	GO:0005840//ribosome
1222	PB.33284.5|m.123278	type:confident-5partial len:130 strand:+ pos:2-391	13336.7	0.186	2	2	PB.70837.1|m.203069;PB.33284.3|m.55087;PB.33284.1|m.26028;PB.33284.4|m.58817	2.01	3.093|0.860|2.083	1.118	2|2|2	0.011|0.873|0.037	TLSFSQTPMARSVALLSFVALSLSAILATSFAPRADSAISCGAVVSAISPCIGYARGVGPLTAGCCGGVRSLNSAASTTPDRRTACNCIRSASAGIAGINPRLAGSIPSKCGVNIPYAISPNTDCSRIR	56.557	6e-40	XP_009384323.1	PREDICTED: non-specific lipid-transfer protein-like [Musa acuminata subsp. malaccensis]	65.96	7e-37	sp|P19656|NLTP_MAIZE	Non-specific lipid-transfer protein OS=Zea mays PE=1 SV=1	-	-	-	-	-	-	-	-	GO:0006869//lipid transport	GO:0008289//lipid binding	-
1225	PB.558.64|m.161205	type:confident-complete len:952 strand:+ pos:111-2966	106565	0.197	1	1	-	1.04	1.213|0.932|0.966	0.153	6|7|8	0.043|0.691|0.765	MEKTSTLLVHFDKGSPALANEIKEALEGNDTSAKAEAMKKAIMLLLHGETLPQLFITIVRYVLPSEDHTVQKLLLLYLEIIDKTDAKGRILPEMILICQNLRNNLQHPNEYIRGVTLRFLCRLSESEIIEPLVPSVLSNLDHRHPFIRRNAILAIMSIYRLPQGEQLLPDAPEMIEKALSTEQDPSAKRNAFLMLFNCDQTRAVNYLLLHVDQVPEWNELMQMVVLDLIRKVCRTNPAEKGKYIVIIVSLLTAPSAGVVYECAGTLVSLSSAPTAIRSAAATYCQLLLSQSDNNVKLIILDRLGELKSSHAEIMVDMIMDVLRALSSPNLDIRRKTLDIALELITPRNIDEVVLTLKKEVVKTQSGELEKNGEYRQMLVQAIHSCAMKFPEVASTVVHL…	91.053	0	XP_020265889.1	coatomer subunit beta-1-like [Asparagus officinalis]	82.63	0	sp|Q9SV21|COPB1_ARATH	Coatomer subunit beta-1 OS=Arabidopsis thaliana GN=At4g31480 PE=3 SV=2	At4g31480	1631	0	KOG1058	Vesicle coat complex COPI, beta subunit	U	Intracellular trafficking, secretion, and vesicular transport	K17301|1|0.0|1804|aof:109841363|coatomer subunit beta	GO:0006886//intracellular protein transport;GO:0016192//vesicle-mediated transport	GO:0005198//structural molecule activity	GO:0030126//COPI vesicle coat;GO:0000139//Golgi membrane
1265	PB.41514.7|m.82526	type:confident-5partial len:457 strand:+ pos:3-1373	51943.6	0.434	3	6	PB.22899.8|m.74076;PB.41514.8|m.88230;PB.41514.2|m.1224	1.24	1.906|0.876|0.938	0.578	5|6|5	0.007|0.600|0.783	SHSLFTTVNMREILHVQGGQCGNQIGSKFWEVVCDEHGIDPTGKYVGTSDLQLERVNVYYNEASCGRYVPRAVLMDLEPGTMDSVRTGPYGQIFRPDNFVFGQSGAGNNWAKGHYTEGAELIDSVLDVVRKEAENCDCLQGFQVCHSLGGGTGSGMGTLLISKVREEYPDRMMLTFSVFPSPKVSDTVVEPYNATLSVHQLVENADECMVLDNEALYDICFRTLKLTTPSFGDLNHLISATMSGVTCCLRFPGQLNSDLRKLAVNLIPFPRLHFFMVGFAPLTSRGSQQYRSLTVPELTQQMWDSKNMMCAADPRHGRYLTASAMFRGKMSTKEVDEQMINVQNKNSSYFVEWIPNNVKSSVCDIAPRGLSMASTFIGNSTSIQEMFRRVSEQFTAMFR…	96.188	0	XP_004962088.1	PREDICTED: tubulin beta-2 chain [Setaria italica]	96.64	0	sp|Q9ZPN9|TBB2_ELEIN	Tubulin beta-2 chain OS=Eleusine indica GN=TUBB2 PE=2 SV=1	At5g12250	871	0	KOG1375	Beta tubulin	Z	Cytoskeleton	K07375|1|0.0|884|sita:101776854|tubulin beta	GO:0007017//microtubule-based process	GO:0003924//GTPase activity;GO:0005200//structural constituent of cytoskeleton;GO:0005525//GTP binding	GO:0005737//cytoplasm;GO:0005874//microtubule
1282	PB.13003.11|m.163730	type:confident-complete len:949 strand:+ pos:149-2995	105721	0.189	16	20	PB.13003.1|m.17536;PB.13003.13|m.166970;PB.13003.10|m.162791	1.1	1.268|0.986|1.032	0.151	19|19|20	0.018|0.954|0.741	MVPTVPFPLPVPRRHAESSLSAAAESPGFSLAVLHLISLPAAADQVRLAAAVNFKNLLRSRFVSLPEPEKTQIKSHLVTLMLASPPKIQSQLSESLAIVSSHDFPQSWPTLLPNIVSSLRSNVANFTVINGILSAVNSIFSKFRHSFGTTPIRLELKYCLDNFAEPLLQTFQSTARLISGGDHEAPLFESQRLCCEIFYSLNSIELPEYFEDHMGEWMTEFRTYLTSTYSPPVEADGTVDSLRAAVCENLQLYMEKNEEEFRDYLSGFASAVYNLITAAPVPSPAGAAARDQLTVTAIKFLTTVSTSVHHTLFGSGEVLQQICQSIAFPNIRLREEDEELFEMNFIEYIRRDIEGSDIDTRRRIACELLKGLALNYKDRVTELVSGQIQHMLAAFAANP…	69.76	0	XP_010915965.1	PREDICTED: exportin-2 [Elaeis guineensis]	56.48	0	sp|Q9ZPY7|XPO2_ARATH	Exportin-2 OS=Arabidopsis thaliana GN=CAS PE=2 SV=1	At2g46520	1131	0	KOG1992	Nuclear export receptor CSE1/CAS (importin beta superfamily)	YU	Nuclear structure;Intracellular trafficking, secretion, and vesicular transport	K18423|1|0.0|1333|egu:105040914|exportin-2 (importin alpha re-exporter)	GO:0006886//intracellular protein transport	GO:0008536//Ran GTPase binding	GO:0005634//nucleus
1300	PB.22405.2|m.4928	type:confident-5partial len:488 strand:+ pos:1-1464	57117.7	0.312	1	2	-	1.1	1.308|0.970|1.035	0.179	25|21|26	0.007|0.799|0.843	AGQTMAEVKIRVFSLLILSHTLLLHLSSAEIIFEERFEDGWESRWVKSDWKRSEGKAGSFKHTPGKWSGNPDDKGIQTYPDAKHFAISAKIPEFSNKDRTLVCQYSIKFEQDIECGGGYIKLMSAYVNQKKFGGDTPYSLMFGPDLCGTQTKKLHLILSYQGQNYPIKKDLQCETDKLTHVYTFILRPDATYSLLVDNRERESGSMYTDWDILPPRKIKDVNAKKPKDWGEREYIDDPDDVKPEGYDKIPAEIPDPKAKKPDSWDEDEDGIWRHPKVPNPRYRGPWKRRRIKNPNYKGKWKIPWIDNPEFEDDPDLYVMKPIKYVGIEVWQVKAGSVYDNILICDDPAYAKQVAEETVLSHREMEKEAFEEAEKVRRAKKEEEAQRARDEGERRRKERG…	90.395	0	XP_020261468.1	calreticulin-3-like [Asparagus officinalis]	74.02	0	sp|O04153|CALR3_ARATH	Calreticulin-3 OS=Arabidopsis thaliana GN=CRT3 PE=1 SV=2	At1g08450	540	0	KOG0674	Calreticulin	O	Posttranslational modification, protein turnover, chaperones	K08057|1|0.0|652|aof:109837575|calreticulin	GO:0006457//protein folding	GO:0005509//calcium ion binding;GO:0051082//unfolded protein binding	GO:0005783//endoplasmic reticulum
1305	PB.20980.1|m.163943	type:dumb-complete len:216 strand:+ pos:2107-2754	22493.6	0.033	1	2	PB.4612.5|m.18197;PB.4612.7|m.55943;PB.26551.2|m.145836;PB.10346.1|m.195929;PB.23980.2|m.150130;PB.4612.14|m.117441;PB.23980.1|m.145232;PB.20767.1|m.151038;PB.4612.9|m.72692;PB.4612.3|m.14636;PB.21266.1|m.149842;PB.23472.1|m.148681;PB.4612.17|m.128343;PB.4612.19|m.126700;PB.22869.1|m.152971;PB.4612.26|m.177896;PB.4612.23|m.143105;PB.4612.10|m.103018;PB.4612.16|m.125683;PB.4612.13|m.117197;PB.1098…	1.34	2.210|0.947|0.868	0.753	2|2|2	0.026|0.977|0.833	MQGRSADLARHAIPALRKQRILLTFAKSQSKRSFPTNGIRFPPSTIPPPPSPWTPPPSRPHGFSRHSSGTKHFGAVSTTGVLPSPTVRPHQNLPPNGIQPLFVTAAPVGPPPVPYPPPVCLVSVPARHVGPRLPVPGTGVFLPPPGSGHSVAPVTSPAEVETGLEKSNCSGDASPTNKLDSNGSTSSVSVEMVTGKEEHHHIENTGNKPTGNGAK	47.059	4e-51	XP_008798368.1	PREDICTED: uncharacterized protein LOC103713273 [Phoenix dactylifera]	-	-	-	-	At1g14710	85.9	4e-19	KOG4176	Uncharacterized conserved protein	S	Function unknown	-	-	-	-
1335	PB.45498.1|m.91626	type:confident-complete len:80 strand:+ pos:1217-1456	8506.18	0.595	1	2	-	1.15	1.227|1.144|1.079	0.074	7|9|8	0.022|0.728|0.706	MFLNAYKNVLAVALATEYSFPQAEKVKEYLKDPSKFAVAVAAAPVAAESVGAPAAAKEEKKEEPEEESDEEMGFGLFDD	70.513	5e-21	CAN76468.1	hypothetical protein VITISV_030042 [Vitis vinifera]	72.73	6e-24	sp|O04204|RLA01_ARATH	60S acidic ribosomal protein P0-1 OS=Arabidopsis thaliana GN=RPP0A PE=1 SV=1	At2g40010	91.7	1e-23	KOG0815	60S acidic ribosomal protein P0	J	Translation, ribosomal structure and biogenesis	K02941|1|1e-21|89.4|vvi:100250067|large subunit ribosomal protein LP0	GO:0042254//ribosome biogenesis		GO:0005840//ribosome
1410	PB.68442.1|m.210074	type:confident-complete len:117 strand:+ pos:68-418	11929	0.466	3	12	PB.8322.4|m.26558;PB.8322.10|m.175956	1.45	1.442|1.505|1.411	0.048	10|11|10	0.032|0.082|0.033	MARQVALCTILVIAAVLFISSPRAESAVSCSTVASAISPCIGYVRGQGALTGACCSGVKGLAAAAATTPDRRTACSCLKSMAGKISGLNPSLAKGLPGKCGASVPYVISTSTDCTK	100	2e-55	ADB12472.1	lipid transfer protein, partial [Crocus sativus]	57.47	1e-33	sp|P81651|NLTP1_PRUAR	Non-specific lipid-transfer protein 1 OS=Prunus armeniaca PE=1 SV=2	-	-	-	-	-	-	-	-	GO:0006869//lipid transport	GO:0008289//lipid binding	GO:0016021//integral component of membrane
1418	PB.64326.1|m.31890	type:confident-complete len:240 strand:+ pos:67-786	26799.1	0.28	1	1	-	1.51	2.122|1.097|1.307	0.541	2|2|2	0.032|0.937|0.697	MAAPLDTPSFHKNILQSDALHQYILETNVYPREHELLKGLREETNKVHQMAFMGVPPEEGQLISILLKLMNAKKTIEIGVFTGYSLLATALALPEDGKITAIDIDRTAYEIGLPFIKEAGVEHKIDFIESPAIPILDKLLKEVKKDELFDFAFVDADKPGYRGYHERLLKLVKVGGVIAFDNTLWLGTVATPEDPSHHPMLREGMNTLIDLNKFLGSDSRIEVSQIAIGDGLTICRRRC	71.967	9e-123	XP_020252871.1	caffeoyl-CoA O-methyltransferase-like isoform X1 [Asparagus officinalis]	62.61	1e-107	sp|A0A077EWA5|NOMT_NARAP	Norbelladine 4'-O-methyltransferase OS=Narcissus aff. pseudonarcissus MK-2014 GN=N4OMT PE=1 SV=1	At1g67980	278	7e-95	KOG1663	O-methyltransferase	Q	Secondary metabolites biosynthesis, transport and catabolism	K21311|1|2e-117|338|egu:105032438|norbelladine O-methyltransferase [EC:2.1.1.336]!K00588|3|2e-116|336|egu:105032439|caffeoyl-CoA O-methyltransferase [EC:2.1.1.104]	-	-	-
1424	PB.44871.3|m.57408	type:confident-5partial len:432 strand:+ pos:1-1296	48086	0.132	4	6	PB.44871.4|m.98248;PB.44871.1|m.10763;PB.44871.2|m.16319	1.05	1.266|0.701|1.172	0.303	5|5|6	0.066|0.030|0.288	LVDGGIRDFARPTPTLSSRFQPSEVRISDHIITVQQQEYKIMSIKGSEAPTRPKLKEMSAEVVDNNPYSRLMALQRMCIVKNYERIRDFSVAIVGIGGVVSVAAEMLTRCGIGRLLLYDYDTVELANMNRLFFRPEQAGMTKTDAAVQTLSNINPDVVLESYSLNITTVKGFDIFLESLKRTWKKSGESSGVDLILSCVDNYEARMVVNQACNELKQTWMESGVSEDAVSGHIQLLIPGETACFACAPPLVVASGVDERTLKRDGVCAASLPTTMGVIAGLLVQNTLKYLLKFGQVSPYLGYNSLKDYFPTMEMRPNPQCSNLACLQRQKEYMDEKPARDALAKAKMEAETSLTEDCPLHMDNEWNISVEDDIEPVGSTSGKTLDVLPEGLTREIPSAD…	80.198	0	XP_020261073.1	ubiquitin-like modifier-activating enzyme 5 [Asparagus officinalis]	79.69	0	sp|Q6K6K7|UBA5_ORYSJ	Ubiquitin-like modifier-activating enzyme 5 OS=Oryza sativa subsp. japonica GN=Os02g0506500 PE=2 SV=1	At1g05350	570	0	KOG2336	Molybdopterin biosynthesis-related protein	H	Coenzyme transport and metabolism	K12164|1|0.0|659|aof:109837297|ubiquitin-like modifier-activating enzyme 5	-	-	-
1430	PB.40823.13|m.202859	type:confident-complete len:107 strand:+ pos:352-672	11331.7	0.509	2	5	-	1.16	1.388|1.111|0.966	0.214	4|3|5	0.040|0.847|0.898	MLQGGDFTLGDGRGGESIYGEKFADENFKLKHTGPVLMSMANAGRDTNGSQFFITTVTTSWLDGKHVVFGKVLSGMDVVYKVEAEGRQDGTPKTKVVIADSGELPL	94.34	2e-67	KCW85440.1	hypothetical protein EUGRSUZ_B02252 [Eucalyptus grandis]	86.79	7e-64	sp|Q9SP02|CP20A_ARATH	Peptidyl-prolyl cis-trans isomerase CYP20-1 OS=Arabidopsis thaliana GN=CYP20-1 PE=1 SV=1	At5g58710	192	1e-63	KOG0865	Cyclophilin type peptidyl-prolyl cis-trans isomerase	O	Posttranslational modification, protein turnover, chaperones	K01802|1|7e-68|206|csv:101213040|peptidylprolyl isomerase [EC:5.2.1.8]	GO:0006457//protein folding	GO:0003755//peptidyl-prolyl cis-trans isomerase activity	-
1473	PB.2628.15|m.76320	type:confident-5partial len:491 strand:+ pos:3-1475	56008.8	0.227	10	17	PB.2628.7|m.9126;PB.2628.1|m.762;PB.2628.18|m.95255;PB.2628.19|m.100619;PB.2628.24|m.222065	1.13	1.369|1.005|1.003	0.211	16|17|17	0.007|0.989|0.987	AAVSDTVAPSRAEMDTGGLSRAGFPRGFTFGTAASAYQVEGEARKGGRGPSIWDAFVGIPGNIANNATADRTVDEYHHYKEDVNIMKKMNFDAYRFSISWSRIFPKGDGKVNWEGVAYYNRLIDYMIKQGITPYANLYHYDLPQALEEKYTGLLSHKFVKDFADYAEFCFEQFGDRVKNWMTFNEPRVVAALGYDDGMFAPARCTNCTAGGNSATEPYIVAHNLILAHASAVKRYRDNYKVKQNGRIGILLDFVWYEPLSNSADDKAAAQRARDFHLGWFLHPIVYGEYPKSMQTIVKERLPKFTSTEVKMVKGSIDFVGINQYTAYYMYDPHTPKQLTPTRYSADWDVGFAYERNGVPIGPRANSYWLYIVPWGMYKAVTYVKEKYGNPVVILSENGM…	84.025	0	XP_020263929.1	beta-glucosidase 1-like [Asparagus officinalis]	78.39	0	sp|Q5QMT0|BGL01_ORYSJ	Beta-glucosidase 1 OS=Oryza sativa subsp. japonica GN=BGLU1 PE=2 SV=1	At3g18080	764	0	KOG0626	Beta-glucosidase, lactase phlorizinhydrolase, and related proteins	G	Carbohydrate transport and metabolism	K05350|1|0.0|862|aof:109839886|beta-glucosidase [EC:3.2.1.21]	GO:0005975//carbohydrate metabolic process	GO:0047701//beta-L-arabinosidase activity;GO:0080079//cellobiose glucosidase activity;GO:0004567//beta-mannosidase activity;GO:0004565//beta-galactosidase activity;GO:0033907//beta-D-fucosidase activity;GO:0004338//glucan exo-1,3-beta-glucosidase activity	-
1478	PB.47975.4|m.51259	type:confident-5partial len:329 strand:+ pos:3-989	36724.8	0.479	1	7	PB.47975.6|m.72838;PB.47975.5|m.57972	1.12	1.366|0.957|1.049	0.215	6|7|7	0.007|0.943|0.908	LKSAVELGIPDAVHKHGKPITLTELAKALSIPATRVPNLQRFMRLLVHSGFFTVTATETGEDVYALTTNSFPLLTKNKGLCMNPLIEAMLDETFLSVWPSLSSWFRTETPPTAFELVHGVPVWDVMATESEFADKMREAMESDSGIVGKVIIADSAHLLHGVNTLVEVVGGTGTMMLAIAEKFPSIKCVVFDLPHRIAAMEKSDKLEYVAGDMFEHIPQADAVIFKWVLMCWTDEQCVTMLKRCKEAIPTKEKGGKAIIIDKVIDADVVNHKVTETQLHFDMQMLVHTGGKQRNEAEWNKLFTEAGFNEYEILPAVLGTRSIIVIYHQ	60.976	4e-140	XP_020247521.1	trans-resveratrol di-O-methyltransferase-like isoform X2 [Asparagus officinalis]	45.12	4e-100	sp|B6VJS4|ROMT_VITVI	Trans-resveratrol di-O-methyltransferase OS=Vitis vinifera GN=ROMT PE=1 SV=2	At4g35160	180	2e-53	KOG3178	Hydroxyindole-O-methyltransferase and related SAM-dependent methyltransferases	R	General function prediction only	K16040|1|3e-110|328|egu:105044075|trans-resveratrol di-O-methyltransferase [EC:2.1.1.240]	-	-	-
1505	PB.39880.10|m.94054	type:confident-complete len:564 strand:+ pos:167-1858	63610.6	0.176	3	4	-	1.06	1.231|0.868|1.088	0.183	7|8|8	0.035|0.554|0.652	MSSSDPPTAEMASSLSSTGSDPSLERSTNRTFILSILSSGESLIGEKLVVGGWVKTGREQGKGTFAFLELNDGSCLSNLQVIVDAEVYPLSQLTATGTSVLLEGVLKKPPAEAKQKVEMRAARIIEVGTVDPAKYPIPKTKLTLENLRDVLYLRARTNTISAVARIRDELAYATHTFFRENGFRYVHTPIITTSDCEGAGEMFQVTALFSDAEKLEKEWKQNPPPSQSEIEAAELITEEKGETIKQLKASKASKEEISAAVSEQKKSKENLSKLKERFNLKPGLPQKDGKIDFSQDFFGRQAFLTVSGQLQVETYACALGNVYTFGPTFRAEHSHTSRHLAEFWMVEPEIAFANLEDDMNYAEKYVRFLSQWLLDHCLEDMELMVKLYDKTAIERLKLV…	81.593	0	XP_010921956.1	PREDICTED: asparagine--tRNA ligase, cytoplasmic 1 [Elaeis guineensis]	68.2	0	sp|Q9SW96|SYNC1_ARATH	Asparagine--tRNA ligase, cytoplasmic 1 OS=Arabidopsis thaliana GN=SYNC1 PE=1 SV=1	At5g56680	816	0	KOG0554	Asparaginyl-tRNA synthetase (mitochondrial)	J	Translation, ribosomal structure and biogenesis	K01893|1|0.0|970|egu:105045391|asparaginyl-tRNA synthetase [EC:6.1.1.22]	-	-	-
1519	PB.63855.1|m.176461	type:suspicious-NA len:95 strand:+ pos:74-358	10525.9	0.628	1	11	PB.63855.2|m.211973;PB.33157.5|m.207428;PB.33157.4|m.202384;PB.74078.1|m.184422;PB.75091.1|m.36334;PB.40702.1|m.35683;PB.74336.3|m.175363;PB.33157.3|m.175626;PB.74336.1|m.37943;PB.74179.1|m.32416;PB.74179.2|m.177153;PB.74338.3|m.177349;PB.74338.2|m.176571;PB.74412.2|m.36051	1.15	1.261|1.005|1.184	0.131	11|11|10	0.011|0.996|0.089	GLGKGGAKRHRKVLRDNIQGITKPAIRRLARRGGVKRISGLIYEETRGVLKIFLENVIRDAVTYTEHARRKTVTAMDVVYALKRQGRTLYGFGG	100	5e-61	ACG30677.1	histone H4 [Zea mays]	100	3e-62	sp|P62786|H42_WHEAT	Histone H4 variant TH091 OS=Triticum aestivum PE=3 SV=2	At5g59970	184	7e-62	KOG3467	Histone H4	B	Chromatin structure and dynamics	K11254|1|8e-61|184|egu:105039262|histone H4	GO:0006334//nucleosome assembly	GO:0042393//histone binding;GO:0046982//protein heterodimerization activity;GO:0003677//DNA binding	GO:0000788//nuclear nucleosome
1572	PB.58592.1|m.37305	type:suspicious-NA len:286 strand:+ pos:77-934	27517.2	0.182	2	4	-	1.29	2.121|0.896|0.866	0.716	3|3|4	0.007|0.834|0.948	MTFASKIGCLLKKVATSNPSILQSIRCMSSSKLFIGGLSYGTDDQSLRDAFTSYGEVVDARVIIDRESGRSRGFGFVTFTSTDEASAAVTAMDGKDLHGRMVRVNYANDRTGGFSGGGGGYGGGGYGGGGGGYGGGGNYGGGSYGSGGGSYGGGSFGSGGGYGGSSGNYGGSYGSGGGGYGGSSGNYGGGSYGSGRGGGYGGSSGGDGNYSVAGGGSSGSYVGGGADGDFAGTGGFGSSGGYGNSAGSDAYGNNNTVGSGVHGNKEDDLLDDFKDDDDDYANKRS	80.909	5e-60	XP_020104752.1	glycine-rich RNA-binding protein 10-like [Ananas comosus]	65	1e-52	sp|Q9FNR1|RBG3_ARATH	Glycine-rich RNA-binding protein 3, mitochondrial OS=Arabidopsis thaliana GN=RBG3 PE=1 SV=1	At5g61030	174	2e-52	KOG0118	FOG: RRM domain	R	General function prediction only	K12741|1|3e-59|194|mus:103979830|heterogeneous nuclear ribonucleoprotein A1/A3	-	-	-
1834	PB.9549.5|m.166077	type:confident-5partial len:997 strand:+ pos:1-2991	111327	0.207	5	10	PB.9549.7|m.172014;PB.9549.1|m.20185;PB.9549.4|m.165394	1.08	1.222|1.014|1.001	0.124	7|9|8	0.020|0.988|0.996	SSAAGMADAGGNVAAGGDLGSGKMVFAPILEEGVFRFDCSPVDREKAFPSLSFADPKARETLIMTYKVPEFVPEFECRSGRQIITIKLPSGSSFYGTGEASGQLERTGKRIFTWNTDAWGYGPETTSLYQSHPWVLALLPDGKALGVLADTTCRCEVDLREESTIKFTAAAVYPVVTFGPFDSPYGVLKSLSHAIGTVFMPPKWSLGYHQCRWSYDSDARVLKIARTFREKGIPCDVIWMDIDYMDGFRCFTFDKERFSDPKSMVNDLHSIGFKAIWMLDPGIKREDGYFVYDSGSENDVWVQKPDGKPYVGEVWPGACVFPDFTRAATRAWWSKLVKDFVSNGVDGIWNDMNEPAVFKTVTKTMPDSNIHRGDDELGGCQNHSHYHNVYGMLMARSTY…	80.244	0	XP_010920077.1	PREDICTED: uncharacterized protein LOC105044009 [Elaeis guineensis]	35.47	1e-103	sp|Q9FN05|PSL5_ARATH	Probable glucan 1,3-alpha-glucosidase OS=Arabidopsis thaliana GN=PSL5 PE=1 SV=1	At3g23640	623	0	KOG1066	Glucosidase II catalytic (alpha) subunit and related enzymes, glycosyl hydrolase family 31	GMO	Carbohydrate transport and metabolism;Cell wall/membrane/envelope biogenesis;Posttranslational modification, protein turnover, chaperones	K01187|1|0.0|1369|dosa:Os07t0421300-01|alpha-glucosidase [EC:3.2.1.20]!K05546|5|2e-112|370|olu:OSTLU_429|mannosyl-oligosaccharide alpha-1,3-glucosidase [EC:3.2.1.207]	GO:0005975//carbohydrate metabolic process	GO:0030246//carbohydrate binding;GO:0004553//hydrolase activity, hydrolyzing O-glycosyl compounds	-
1847	PB.47918.5|m.52947	type:confident-5partial len:310 strand:+ pos:3-932	33583.8	0.168	3	3	PB.47918.8|m.82569;PB.47918.2|m.15018;PB.47918.1|m.681	1.23	1.560|0.942|1.179	0.312	3|3|3	0.022|0.953|0.484	ALVPAAPHQPLEALPPPELLDHKIVVQAAEAERILRENQKLAATHVALKEELFAIQQERQRIQAHVGSIQTESDIQVRGLLEKIKKMEADIRAGEIVKKELQQAHLEAQALYIARQELSAEIQLATEELQKGSVDGKRLPELNMELEELKQELQKLRAAFEHEKGSNVEQVEQMHSMEKNLISLSREVEKLRAEVMNAERGMHAPNSYSGSGNYSIPDPSYPSAALGGAYAGGGYGYGSSEYPNSRYVQGGPASYPQPYGRSGGPTYSDGYGRPQPQMSGGAATHMESGYADGYGSHHAQMSGLGGGPL	57.003	3e-102	XP_008804227.1	PREDICTED: protein FLX-like 4 [Phoenix dactylifera]	43.32	2e-48	sp|Q84TD8|FLXL2_ARATH	Protein FLX-like 2 OS=Arabidopsis thaliana GN=FLXL2 PE=1 SV=1	-	-	-	-	-	-	-	K03257|1|2e-16|84.0|nta:107761684|translation initiation factor 4A!K13207|5|1e-14|78.6|smo:SELMODRAFT_414635|CUG-BP- and ETR3-like factor	-	-	-
1851	PB.43330.8|m.71202	type:confident-5partial len:366 strand:+ pos:1-1098	39169.4	0.375	3	5	-	1.11	1.300|1.087|0.943	0.18	5|4|5	0.032|0.920|0.764	VKEGIKSAFPNEKEIVVKSQILAGGRGLGTFKSGLKGGVHIVKAEEAEDLAGKMLGQILVTKQTGPQGRTVSKVYLCEKLSLVNEMYFAITLDRTSAGPIIIACKKGGTSIEDLAEKFPDMIIKVPIDVFKGITDEDAAKVVDGLAPKVADRTASIEQVKKLYKLFCACDCTMLEINPIAETSDNQLVAADAKLNFDDNASYRQKEIFALRDTSQEDPREVAAAKADLNYMGLDGEIGCMVNGAGLAMATMDIIKLHGGTPANFLDVGGNASESQVVEAFKILTSDDKVKAILVNIFGGIMKCDVIASGIVNAAKQVSLKVPVVVRLEGTNVDQGKRILKESGKTLITAEDLDDAAEKAVKASST	93.681	0	XP_020259842.1	succinate--CoA ligase [ADP-forming] subunit beta, mitochondrial [Asparagus officinalis]	89.53	0	sp|Q6K9N6|SUCB_ORYSJ	Succinate--CoA ligase [ADP-forming] subunit beta, mitochondrial OS=Oryza sativa subsp. japonica GN=Os02g0621700 PE=1 SV=1	At2g20420	651	0	KOG2799	Succinyl-CoA synthetase, beta subunit	C	Energy production and conversion	K01900|1|0.0|694|aof:109836367|succinyl-CoA synthetase beta subunit [EC:6.2.1.4 6.2.1.5]	GO:0006099//tricarboxylic acid cycle	GO:0004775//succinate-CoA ligase (ADP-forming) activity;GO:0000287//magnesium ion binding;GO:0005524//ATP binding	GO:0005739//mitochondrion
1881	PB.2712.2|m.45792	type:confident-5partial len:273 strand:+ pos:2-820	29964.1	0.07	1	4	PB.919.22|m.112881	1.26	1.821|0.802|1.142	0.519	4|4|3	0.039|0.623|0.626	AAGQAAILSGEGNEKVQDLLLLDVTPRSLGLETAGGVMTVLFPRNTTIPTKKEQVFSIYSDNQPGVLFQVYEGERTRTRDNNLLGKFELSGIPPAPRGVPQITVWFEIDANGILNVSAEDKTTRQKNKITITNDKGRLSKDEIEKMVQEAEKYKSEDEEHKQNVESMNALENYAYTMRITIKDDKIASKLPEADKKRLRIPLQEAIQWLVANQLAEADEFDDKMKELEGVCNPIIAKMYQGAGADMDGGMDEDGPAAPTGGSSAGPKIEEVD	87.868	1e-166	ABG22609.1	Heat shock cognate 70 kDa protein, putative, expressed [Oryza sativa Japonica Group]	80.59	7e-150	sp|P24629|HSP71_SOLLC	Heat shock cognate 70 kDa protein 1 OS=Solanum lycopersicum GN=HSC-I PE=2 SV=1	At5g02500	430	2e-148	KOG0101	Molecular chaperones HSP70/HSC70, HSP70 superfamily	O	Posttranslational modification, protein turnover, chaperones	K03283|1|5e-165|476|obr:102702507|heat shock 70kDa protein 1/2/6/8		GO:0005524//ATP binding	-
2039	PB.425.38|m.170127	type:suspicious-NA len:679 strand:+ pos:1239-3275	77340.4	0.181	1	2	-	1.57	2.484|1.217|1.000	0.802	2|2|2	0.049|0.815|1.000	MYPLLNFLCQHNYNGMEMMLNDRIESLVALQSTLRKAEKYLLNIPQDTPYSNFHHRFQEFGLEKGWGDTAQRVHENIHLLLDLLEAPDPCTLETFLSTIPMVFNVVILSPHGYLAQAKVLGYPDTGGQVVYILDQVRALESEMLLRIKHQGLDIIPKILIVTRLLPDAVGTTCGQRLEKVLGTEHTHILRVPFRTEKVILRKWISRFDVWPYLETYTEDVANELASELQATPDLIIGNYSDGNLVASLLAHKLGVTQCNIAHALEKTKYPNSDLYWKKFDDQYHFSSQFTADLFAMNHTDFIITSTFQEIAGSQDTVGQYESHTAFTLPGLYRVVHGIDVFDPKFNIVSPGADMTIYFPYTEKSRRLTSLHLEIEELLYSSDENTEHKGVLKDRTKPII…	88.715	0	XP_020270187.1	sucrose synthase 2 [Asparagus officinalis]	85.74	0	sp|Q41608|SUS1_TULGE	Sucrose synthase 1 OS=Tulipa gesneriana PE=2 SV=1	At3g43190	1036	0	KOG0853	Glycosyltransferase	M	Cell wall/membrane/envelope biogenesis	K00695|1|0.0|1194|aof:109845351|sucrose synthase [EC:2.4.1.13]	GO:0005985//sucrose metabolic process	GO:0016157//sucrose synthase activity	-
2098	PB.387.7|m.58675	type:confident-complete len:293 strand:+ pos:128-1006	30555.7	0.377	2	3	PB.387.27|m.189647;PB.387.9|m.60873;PB.7495.3|m.141952;PB.387.12|m.78763;PB.387.20|m.92745;PB.387.32|m.222030;PB.387.21|m.97380;PB.387.17|m.81331;PB.387.14|m.79665;PB.387.10|m.62656	1.23	1.838|0.983|0.877	0.527	3|3|3	0.039|0.995|0.849	MMEKVKEKLPGGHNEHGNAATEYGGTTAIGSHPPENKGMMEKVKEKLPGGHNGHGNATTGYGGTTAIGSHPPENKGMMEKVKEKLPGGHNEHGNTTTGYGGTTAIGSHPPENKGMMEKVKEKLPGARNDEHVHTTTEYGGTTAVGGHPHENKGMVETVKEKLPGGHKEHGNATTEYGGTTDIGVHPHENKGMIEKVKEKLPGGHNEHGHSTTGYEGATTGHEVTTVGADHPHENKGVMEDIKEKLPGGHKTDASTGYGGTTTGPTTTAAGAHPEELPEKKGLMEKIKDMLPG	41.642	3e-37	AGV21052.1	dehydrin 3 [Eriobotrya japonica]	31.71	2e-23	sp|P46525|CS120_WHEAT	Cold-shock protein CS120 OS=Triticum aestivum GN=CS120 PE=2 SV=2	-	-	-	-	-	-	-	-	GO:0006950//response to stress;GO:0009415//response to water	-	-
2196	PB.67025.2|m.56896	type:likely-NA len:241 strand:+ pos:54-776	27214	0.562	7	18	PB.67025.1|m.37272	1.21	1.447|1.191|0.987	0.23	16|17|17	0.007|0.043|0.958	MASVRVFGSPTSAEVARVLACLFEKEVEFQLIRVENFKGRQRRPEYLKLQPSGQALTYEEGSVTLVDSRAICRHISEKYADQGNRDLLGSGTLERASIEQWLQTEANSFDPPSSALVFHLAYSAAVDPEKEAVVEGSKQKLERVLDIYEQRLQETSYLAGDHFTLADLSHLPNAHRLVTSVVPGCASMFTSRKKVSNWWEKISNRASWKRVVEMQQELKKMPPVNVEEGPKEAPTKRISI	76.316	2e-125	ANH58195.1	glutathione S-transferase [Dracaena cambodiana]	44.61	5e-55	sp|P42761|GSTFA_ARATH	Glutathione S-transferase F10 OS=Arabidopsis thaliana GN=GSTF10 PE=1 SV=3	At2g30870	175	1e-54	KOG0867	Glutathione S-transferase	O	Posttranslational modification, protein turnover, chaperones	K00799|1|3e-122|350|aof:109821359|glutathione S-transferase [EC:2.5.1.18]	-	-	-
2251	PB.62685.1|m.5798	type:likely-NA len:144 strand:+ pos:50-481	16639.7	0.189	2	3	PB.53394.3|m.29626;PB.53394.8|m.60181;PB.53394.9|m.67137;PB.53394.13|m.215303	2.44	4.050|0.908|2.372	1.572	3|3|3	0.007|0.947|0.037	MADPSSDCLKLFGNWASSYTHRVQLALKLKGLQFEYLEEDLANKSPSLLLHNPIHKKVPVLLHGGRPVPESLVILQYIDDAFVSPDHPIVPLDPYEKSVALFWSHFIDDKFFFLFFFFFLGPHYILLGPCRRPHAWVLLTCFV	72.973	2e-49	ANH58203.1	glutathione S-transferase [Dracaena cambodiana]	51.33	3e-38	sp|Q9ZW24|GSTU7_ARATH	Glutathione S-transferase U7 OS=Arabidopsis thaliana GN=GSTU7 PE=2 SV=1	At2g29420	129	5e-38	KOG0406	Glutathione S-transferase	O	Posttranslational modification, protein turnover, chaperones	K00799|1|5e-50|164|egu:105034177|glutathione S-transferase [EC:2.5.1.18]	GO:0009407//toxin catabolic process;GO:0006749//glutathione metabolic process	GO:0016740//transferase activity;GO:0004364//glutathione transferase activity	GO:0005737//cytoplasm
2271	PB.43801.1|m.742	type:confident-complete len:309 strand:+ pos:173-1099	33156.2	0.497	7	45	-	1.04	1.212|0.880|1.026	0.166	45|44|43	0.007|0.175|0.867	MATSGKKIKIGLNVFGRIGRLVARVALQSSDVELVAVNDPFITTDYMTYMFKYDSVHGQWKHNEIKVKDSKTLLFGEKAVAVFSCRNPEEIPWGEAGADYVVESTGVFTDKDKAAAHLKGGAKKVIISAPSKDAPMFVVGVNEKSYTSDINILSNASCTTNCLAPLAKVINDRFGIVEGLMTTVHSITATQKTVDGPSAKDWRGGRAASFNIIPSSTGAAKAVGKVLPALNGKLTGMSFRVPTVDVSFVDLTVRLEKAATYEQIKAAIKEESEGNLKGIMGYVDEDLVSTDFIGDTRSSIFDAKAGLL	91.531	0	XP_020260223.1	glyceraldehyde-3-phosphate dehydrogenase 2, cytosolic [Asparagus officinalis]	89.7	0	sp|Q7FAH2|G3PC2_ORYSJ	Glyceraldehyde-3-phosphate dehydrogenase 2, cytosolic OS=Oryza sativa subsp. japonica GN=GAPC2 PE=1 SV=1	At3g04120	553	0	KOG0657	Glyceraldehyde 3-phosphate dehydrogenase	G	Carbohydrate transport and metabolism	K00134|1|0.0|582|aof:109836660|glyceraldehyde 3-phosphate dehydrogenase [EC:1.2.1.12]	GO:0006006//glucose metabolic process	GO:0051287//NAD binding;GO:0016620//oxidoreductase activity, acting on the aldehyde or oxo group of donors, NAD or NADP as acceptor;GO:0050661//NADP binding	-
2305	PB.10719.2|m.33441	type:confident-complete len:249 strand:+ pos:139-885	28883.6	0.226	4	6	PB.42191.4|m.205633;PB.42191.1|m.31660	1.28	1.766|0.915|1.150	0.439	4|6|5	0.007|0.660|0.595	MRPVFCGNFDYETRQSDLDRLFGRYGRVDRIDMKSGFAFVYFLEERDAEDAIRGLDDIPFGHSKRRLSVEWSRQGDRGPRHREGSKSIANSRPTRTLFVINFDPIRTRPRDIERHFEPYGKVLNVRIRKNFAFVQFETQEEATKALDGTNMTKILDRVVSVEYALRDDGEQGGDSPRRGGGYGRRGGSPYGRSVSPVPRRGRPSPDYGRQHSPVYDRYNAPSSYERARERSPEYRRYPSRSPPRRSRT	81.2	2e-135	XP_008790534.1	PREDICTED: serine/arginine-rich splicing factor RS31-like [Phoenix dactylifera]	64.66	2e-104	sp|P92964|SRS31_ARATH	Serine/arginine-rich splicing factor RS31 OS=Arabidopsis thaliana GN=RS31 PE=1 SV=2	At3g61860	301	4e-103	KOG0106	Alternative splicing factor SRp55/B52/SRp75 (RRM superfamily)	A	RNA processing and modification	K12893|1|3e-136|387|pda:103707715|splicing factor, arginine/serine-rich 4/5/6	GO:0000398//mRNA splicing, via spliceosome	GO:0003723//RNA binding	GO:0005681//spliceosomal complex
2315	PB.56910.7|m.189194	type:confident-5partial len:235 strand:+ pos:2-706	27561.3	0.098	1	2	PB.56910.5|m.52575;PB.56910.1|m.3743;PB.56910.2|m.8758;PB.56910.3|m.17462;PB.56910.4|m.35289	1.63	2.657|0.908|1.316	0.915	2|2|2	0.011|0.934|0.462	KYTGTGFQSKGTYLFGHFSMQMKLVPGDSAGTVTAFYLSSQNSEHDEIDFEFLGNTTGQPYILQTNVFTGGQGNREQRIYLWFDPTKGYHAYSVLWNMYQIVFLVDDVPIRVFKNCKDLGVRFPFNQPMKIYSSLWNADDWATRGGLVKTDWSKAPFVASYRGFHVDGCEASVEAKFCATQGMRWWDQKDFQDLDGLQYRRLSWVRQKYTIYNYCNDRSRYHTVPPECKRDRDI	91.88	2e-163	XP_006385866.1	hypothetical protein POPTR_0003s15800g [Populus trichocarpa]	85.04	8e-154	sp|Q9XIW1|XTH5_ARATH	Probable xyloglucan endotransglucosylase/hydrolase protein 5 OS=Arabidopsis thaliana GN=XTH5 PE=2 SV=1	-	-	-	-	-	-	-	K08235|1|2e-163|456|pop:7497570|xyloglucan:xyloglucosyl transferase [EC:2.4.1.207]	GO:0042546//cell wall biogenesis;GO:0071555//cell wall organization;GO:0010411//xyloglucan metabolic process	GO:0016762//xyloglucan:xyloglucosyl transferase activity;GO:0004553//hydrolase activity, hydrolyzing O-glycosyl compounds	GO:0005618//cell wall;GO:0048046//apoplast
2392	PB.59845.2|m.58787	type:confident-complete len:266 strand:+ pos:60-857	29936.3	0.389	2	4	PB.59845.4|m.204655	1.09	1.603|0.758|0.899	0.453	4|4|4	0.018|0.367|0.888	MARGLKKHLKRLNAPRHWMLNKLGGAFAPKPSSGPHKARECLPLILILRNKLKYALTYREVISILMQRHVMVDNKVRTDKTYPAGFMDVVSIPKTNENFRLLYDTKGRFRLHSIRDEEAKFKLCKVRNVQFGQKGIPYLNTYDGRTIRYPDPLIRANDTIKLDLETGKIVDFIKFDVGNVVMVTGGRNTGRVGVIKNREKHKGTFETIHVQDATGHEFATRLGNVFTVGKGTKPWVTLPKGKGIKLSIIEEARKRAAAAAVTAAA	90.875	0	KVI11396.1	KOW-like protein [Cynara cardunculus var. scolymus]	88.64	0	sp|P46300|RS4_SOLTU	40S ribosomal protein S4 OS=Solanum tuberosum GN=RPS4 PE=2 SV=1	At5g58420	496	5e-180	KOG0378	40S ribosomal protein S4	J	Translation, ribosomal structure and biogenesis	K02987|1|0.0|511|vra:106765335|small subunit ribosomal protein S4e	GO:0006412//translation	GO:0019843//rRNA binding;GO:0003735//structural constituent of ribosome;GO:0003723//RNA binding	GO:0022627//cytosolic small ribosomal subunit;GO:0005840//ribosome
2465	PB.68696.2|m.195218	type:confident-complete len:251 strand:+ pos:95-847	23282.1	0.412	5	11	PB.68696.1|m.29264	1.33	1.558|1.133|1.298	0.214	11|9|11	0.018|0.415|0.417	MTERVKGTVKWFNGTKGFGFITPDDGGEDLFVHQSSIKSDGYRSLAEGEHVEFSISQGDDGRTKAVDVTGPDGANVQGGPPGGGDGGGGRGGRGGVGGYGGGGGYGGGGGYGGGERGGGGYGGGERGGGGYGGGGSYGGGERGGGGYGGGGNYGGGERGGSRGGGGYGGGGYGGGGGGGACYTCGESGHMARDCNSGGGGGGGRSYGGGGGGGRYSGGGGGYSGGGGGGGSGCYNCGEMGHFARECPTQK	58.065	1e-42	BAJ95296.1	predicted protein [Hordeum vulgare subsp. vulgare]	43.72	2e-38	sp|O65639|CSP1_ARATH	Cold shock protein 1 OS=Arabidopsis thaliana GN=CSP1 PE=1 SV=1	At4g36020	136	3e-38	KOG3070	Predicted RNA-binding protein containing PIN domain and invovled in translation or RNA processing	J	Translation, ribosomal structure and biogenesis	K09250|1|2e-44|154|zju:107424382|cellular nucleic acid-binding protein	GO:0006355//regulation of transcription, DNA-templated	GO:0008270//zinc ion binding;GO:0003677//DNA binding	-
2618	PB.72182.1|m.188199	type:confident-complete len:208 strand:+ pos:37-660	23917.1	0.348	1	1	-	1.09	1.432|0.940|0.900	0.296	14|15|16	0.007|0.834|0.423	MVKHNDVIPNGHFKKHWQDYVKTWFDQPARKTRRRIARQKKAVKNFPRPTAGPLRPVVHCQTRKYNMKPRAGRGFTLEELKAAGIPQKLAPTIGIAVDHRRKNRSLEGLQANVQRLKTYKAKLVIFPRRAGKFKAGDSTQEELATATQIQGTYLPIEREKITVDLVKVTDEMKAFRAYAKLRVERMNQRQIGARLKKAAEAEKDEKK	85.99	2e-132	XP_010243468.1	PREDICTED: 60S ribosomal protein L13-1 [Nelumbo nucifera]	79.13	2e-120	sp|P41129|RL132_BRANA	60S ribosomal protein L13-2 OS=Brassica napus PE=2 SV=1	At3g49010	323	1e-113	KOG3295	60S Ribosomal protein L13	J	Translation, ribosomal structure and biogenesis	K02873|1|3e-133|375|nnu:104587521|large subunit ribosomal protein L13e	GO:0006412//translation	GO:0003735//structural constituent of ribosome;GO:0003723//RNA binding	GO:0022625//cytosolic large ribosomal subunit;GO:0005840//ribosome
2660	PB.71919.1|m.30618	type:confident-complete len:186 strand:+ pos:35-592	21412.6	0.103	2	3	PB.72657.1|m.25638;PB.71919.2|m.197828	1.2	1.580|0.966|1.067	0.329	3|3|3	0.022|0.969|0.960	MKEKETRIPKSLIWIVAMSALFSSVYALDDKCSACNAVAAELELGLSNEKPRNHLDMRHRLDSKGQREGKVIDYRVSDLRVVELLDGLCEKMQDYTLEKMDSGRQAWVKVKDWDKLQTDKQEARAYSKAMSSFCGRLLEETEDELSDWIKRGSVQTGGVSKALCQDLSKHCSMSRGYNEIDDKEL	76.243	5e-97	XP_020242591.1	protein canopy-1 [Asparagus officinalis]	-	-	-	-	7303809	52.4	2e-08	KOG3782	Predicted membrane protein, contains type II SA sequence	R	General function prediction only	K22816|1|2e-59|186|pda:103723517|protein canopy homolog 3/4			GO:0016021//integral component of membrane
2681	PB.23152.5|m.88437	type:suspicious-NA len:502 strand:+ pos:59-1564	55436.8	0.325	13	22	PB.23152.3|m.82077	1.07	1.202|0.975|1.019	0.12	22|22|21	0.020|0.943|0.883	MAASPFHQPTTFSPAATAMTKMPFSRDRRELGFYPCLSRTLELTRAAFSRSRPIPSRARLLGVRGSNEENKGVNAAVSVSDERNSGPLKSRNSAVRRHTISVFVGDESGMINRIAGVFARRGYNIESLAVGLNKDKALFTIVVSGTEKVLQQVVEQLHKLVNVMKVEDLSKVPQVERELMLIKLNVDPDRRQEVMGLVDIFRAKIVDVSEDSLTIEVTGDPGKMVAVQRNLSKFGVREIARTGKIALRREKMGATAPFWRFSAASYPDLEGTMSSTPLLVPTDRSVSGESELSSGGDVYPVEPYEGFSMNHILDAHWGVLRDNEDSSGLCSHTLSILVADCPGVLNIVTGIFSRRGYNIQSLAVGPAEKEGISRITTVVPGTDESISKLIQQICKLIDV…	77.938	0	XP_009406425.1	PREDICTED: acetolactate synthase small subunit 2, chloroplastic [Musa acuminata subsp. malaccensis]	76.1	0	sp|Q93YZ7|ILVH2_ARATH	Acetolactate synthase small subunit 2, chloroplastic OS=Arabidopsis thaliana GN=At2g31810 PE=1 SV=1	At5g16290	635	0	KOG2663	Acetolactate synthase, small subunit	E	Amino acid transport and metabolism	K01653|1|0.0|750|mus:103989338|acetolactate synthase I/III small subunit [EC:2.2.1.6]	GO:0009082//branched-chain amino acid biosynthetic process	GO:0003984//acetolactate synthase activity	-
2718	PB.32279.10|m.188902	type:confident-5partial len:199 strand:+ pos:2-598	22542.4	0.141	3	4	PB.32279.11|m.205667;PB.32279.1|m.40748;PB.18410.2|m.25838;PB.32279.4|m.84366;PB.32279.8|m.124632;PB.32279.6|m.105346;PB.41836.1|m.102924	1.16	1.410|0.984|1.077	0.224	4|4|4	0.035|0.985|0.760	SVSKLGYSGTAIISRIKPVSVRYGLGIPDHDTEGRLVTVEFDKFYLLCGYVPNSGDGLKRLTYRVKEWDPSLSNYMKELEKSKPVILTGDLNCAHQEIDIFDPAGNRRNAGFTDEERESFDMNFLSRGFVDTFRKQHPGVVGYTYWGYRHGGRKTNKGWRLDYFLVSESIADKVHDSYILPEVTGSDHCPVGLILKLA	88.325	3e-131	XP_009597837.1	PREDICTED: DNA-(apurinic or apyrimidinic site) lyase, chloroplastic [Nicotiana tomentosiformis]	81.22	3e-121	sp|P45951|ARP_ARATH	DNA-(apurinic or apyrimidinic site) lyase, chloroplastic OS=Arabidopsis thaliana GN=ARP PE=1 SV=2	At2g41460	353	7e-121	KOG1294	Apurinic/apyrimidinic endonuclease and related enzymes	L	Replication, recombination and repair	K01142|1|5e-132|384|nto:104093736|exodeoxyribonuclease III [EC:3.1.11.2]	GO:0006284//base-excision repair;GO:0006281//DNA repair	GO:0140078//class I DNA-(apurinic or apyrimidinic site) lyase activity;GO:0004519//endonuclease activity;GO:0008311//double-stranded DNA 3'-5' exodeoxyribonuclease activity;GO:0003906//DNA-(apurinic or apyrimidinic site) lyase activity;GO:0140080//class III/IV DNA-(apurinic or apyrimidinic site) lyase activity;GO:0003677//DNA binding;GO:0046872//metal ion binding	GO:0005634//nucleus;GO:0005622//intracellular
2741	PB.881.3|m.8018	type:suspicious-NA len:548 strand:+ pos:1-1644	60314	0.174	1	1	-	1.24	1.645|0.936|1.126	0.367	3|3|4	0.015|0.917|0.674	QDRVNNNEGKNQRRRQFNNENPGDGELVVYRILCPDGVIGGVIGKGGKVINALRQETHAWIKVVDPFPGADKRVITIYCFVKDKNPEDVDEDDERPVCPAQDALLRVHSSILTSLANNDDSDKRHREEANLLVPASQAANVIGKSGVTIKRLRSKTGANIKVSPKDPSDPTHSCAMSFDNFIQITGDSEAVKNALFAVSAIMYKFSPKEEISLETTVSELPHIVIPSDVPIYPAGSFYPGADSMIPPGNLPPVLGATMQVPPLHGFVDTDGSWPMYSSALPVVSGYGGSSRSEDLIVRVLCPSDKIGRVIGKGGSTIKNIRQASGARIDVDDKKHDVAECVITVTATESAEDMKSAAVEAVLLLQSQINDEDDERVNMRLLVPQKVVGRLIGKNGAIIN…	71.573	0	XP_008797386.1	PREDICTED: LOW QUALITY PROTEIN: KH domain-containing protein At4g18375-like [Phoenix dactylifera]	50.61	7e-152	sp|P58223|Y4837_ARATH	KH domain-containing protein At4g18375 OS=Arabidopsis thaliana GN=At4g18375 PE=2 SV=1	At5g46190	478	8e-163	KOG2190	PolyC-binding proteins alphaCP-1 and related KH domain proteins	AR	RNA processing and modification;General function prediction only	K21444|1|0.0|720|pda:103712597|poly(rC)-binding protein 3/4		GO:0003723//RNA binding	-
2751	PB.1448.15|m.187516	type:confident-5partial len:1205 strand:+ pos:1-3615	134949	0.11	10	14	PB.1448.2|m.26810;PB.3145.19|m.219704;PB.3145.17|m.187594;PB.1448.14|m.176656	1.11	1.230|1.046|1.058	0.103	12|14|13	0.015|0.884|0.565	KDYRYMATSDLLNELNKEGFKADVDLELKLTNTVVQQLEDASGDVSGLAVKCLPPIVKKVSEDRVLEMANKLCDKLFHGKDQHRDINSIALRMIVSEISMPSLAQRIQDSLGPQLIRGITNPGLRVEIKCENFDILCDMLNKFGNLMVKDHEKLLNGILSQLNSNQASIRKKSISCIASLASSLSDDLLAKATAEVVQLLKRKNVKPEITRTNIQMIGALSRSVGYRFGPHLGETVPLLISYCTSASEADDELREYSLQALESFLLRCPRDISAYCDDILNLCLEYLSYDPNFTDNMEEDTDDEGHEEEEDDESADEYTDDEDASWKVRRASAKCLAAIIVSRPEMLSKMYLEACPKLIDRFREREENVKMDVFSTFIELLRQTGNVTKGHIDTNESSP…	88.206	0	XP_020253052.1	cullin-associated NEDD8-dissociated protein 1 isoform X1 [Asparagus officinalis]	76.99	0	sp|Q8L5Y6|CAND1_ARATH	Cullin-associated NEDD8-dissociated protein 1 OS=Arabidopsis thaliana GN=CAND1 PE=1 SV=1	At2g02560	1859	0	KOG1824	TATA-binding protein-interacting protein	R	General function prediction only	K17263|1|0.0|2124|aof:109830249|cullin-associated NEDD8-dissociated protein 1	-	-	-
2757	PB.21233.1|m.171924	type:suspicious-NA len:328 strand:+ pos:160-1143	35116.5	0.373	1	2	PB.4275.27|m.76817	1.39	1.846|1.053|1.283	0.408	8|8|8	0.007|0.815|0.033	MLAIDTSSDAAWIPSSACVGCPPSSTNYSPTRSATYRPVPCGSPQCDQVPNPSCPAASPACSFNLIYGSSNVTATLAQDSLSLASDVIKGYTFGSIVRSTGASVPPQGLLGLGRGPLSFLSQTKSLYSSTFSYCLPGFRSLNFSGTLRLGPSGQPVRIKTTPLLTNPHRSSLYYVSLDRIRVGRRYVRIPASSLAADPATGAGTIFDSGTMFTRLVAPAYTAVRDEFRRRVKGTVTSLGGFDTCYNGPVTAPLITFEFTGMNFTLPAENVMIHSTSGTIRCLAMAAAPDNVNSVLNVIASMQQQNHRILFDVPNGRIGVSREPCTAA	74.312	3e-165	XP_008782021.1	PREDICTED: aspartyl protease AED3-like [Phoenix dactylifera]	52.27	7e-112	sp|O04496|AED3_ARATH	Aspartyl protease AED3 OS=Arabidopsis thaliana GN=AED3 PE=1 SV=1	At3g54400	443	1e-155	KOG1339	Aspartyl protease	O	Posttranslational modification, protein turnover, chaperones	K01381|1|1e-144|418|mdm:103438621|saccharopepsin [EC:3.4.23.25]!K01379|3|1e-141|410|cmos:111449626|cathepsin D [EC:3.4.23.5]		GO:0004190//aspartic-type endopeptidase activity	-
2775	PB.226.38|m.173128	type:likely-NA len:824 strand:+ pos:766-3237	89378.7	0.111	4	5	PB.226.45|m.175437;PB.226.36|m.170869;PB.226.7|m.28800;PB.226.40|m.169476;PB.226.9|m.36737;PB.226.8|m.36390;PB.226.54|m.216783;PB.226.2|m.20884;PB.226.29|m.160023	1.19	1.066|1.595|0.900	0.363	4|4|4	0.849|0.030|0.783	MVVIQGGIGPAGLSAEDLHVLDLTQQRPRWHRVIVQGPGPGPRYGHVMALVGQRFLLAIGGNDGKRPLADVWALDTAAKPYEWRKLEPEGEGPPPCMYATASARSDGLLLLCGGRDQSSVPLASAYGLAKHRDGRWEWAIAPGVSPSPRYQHAAVFVNARLHVSGGALGGGRMVEDSSSIAVLDTAAGVWCDTQSVVTSPRTGRYSADAAGGDASVELTRRCRHAAAAVGDLIFIYGGLRGGVLLDDLLVAEDLAAAETTIAASHAAAAAAVSDVQPGRSPGRYTFGDERTKQGIPEAVADGAVVLGSPVAPPINGDMHTDISSENAMLLGPRRLNKGVEYLVEASAAEAEAINATLAAAKARQVNGETEQLPDRDRGAEATPSGKQISPLIKVPEPSL…	92.467	0	XP_017615203.1	PREDICTED: serine/threonine-protein phosphatase BSL3 [Gossypium arboreum]	91.74	0	sp|Q9SHS7|BSL3_ARATH	Serine/threonine-protein phosphatase BSL3 OS=Arabidopsis thaliana GN=BSL3 PE=1 SV=2	At1g08420_1	786	0	KOG0379	Kelch repeat-containing proteins	R	General function prediction only	K01090|1|0.0|1035|soe:110803961|protein phosphatase [EC:3.1.3.16]	GO:0009742//brassinosteroid mediated signaling pathway	GO:0004721//phosphoprotein phosphatase activity	-
2802	PB.59243.1|m.32288	type:confident-complete len:273 strand:+ pos:43-861	28785.5	0.401	4	6	-	1.15	1.523|1.012|0.928	0.322	9|9|8	0.026|0.985|0.657	MESVSELPAIARKLEGKVAVITGGASGIGECTARLFCRHGAKVVIADVQEELGRSVSNDLGSAASFVHCDVTNEDDISKAVDYAVDKFGKLDIMFNNAGTSGPNSLSILDYQKSDLEHILAVNFVGPFLGTKHAARVMIPARRGCIISTSSVASVTAGITPHGYTCSKHAVVGLTKSAAFELGRYGIRVNCVSPHALSTPMTTGFFNMTGGQLEAMVSSVANLNGVILKAGDIANAVLYLASDDSRYVSGQNLVVDGAYSVANPSIDVFKEM	69.118	7e-133	XP_020083116.1	momilactone A synthase-like [Ananas comosus]	61.71	5e-103	sp|Q7FAE1|MOMAS_ORYSJ	Momilactone A synthase OS=Oryza sativa subsp. japonica GN=Os04g0179200 PE=2 SV=1	At2g47140	256	4e-85	KOG0725	Reductases with broad range of substrate specificities	R	General function prediction only	K13070|1|1e-101|301|osa:4335093|momilactone-A synthase [EC:1.1.1.295]!K09841|2|2e-96|288|oeu:111410241|xanthoxin dehydrogenase [EC:1.1.1.288]		GO:0016491//oxidoreductase activity	-
2841	PB.40309.3|m.18193	type:confident-complete len:490 strand:+ pos:121-1590	54228.9	0.297	10	13	PB.41106.1|m.99760;PB.40309.13|m.105450;PB.40309.1|m.7652	1.14	1.223|1.137|1.073	0.075	11|12|12	0.032|0.513|0.707	MSSLPSEAIYEKEKSGVTWPKQLNAPLDVVDPEIANIIELEKCRQWKGLELIPSENFTSLSVMQAVGSVMTNKYSEGYPGARYYGGNEYIDMAESLCQKRALEAFRLDPAKWGVNVQSLSGSPANFQVYTALLKPHERIMALDLPHGGHLSHGYQTDTKKISAVSIFFETMPYRLDESTGYIDYDQLEKSATLFRPKLIVAGASAYARLYDYARIRKVCDKQKAILLADMAHISGLVAGGVIPSPFEYADVVTTTTHKSLRGPRGAMIFYRKGVKEINKQGKEVLYDFEDRINAAVFPGLQGGPHNHTITGLAVALKQATTPEYKAYQEQVLSNCAKFAQRLTKQGYELVSGGTENHLVLVNLKNKGIDGSRVEKVLESVHIAANKNTVPGDVSAMVPG…	93.673	0	XP_020104608.1	serine hydroxymethyltransferase, mitochondrial-like [Ananas comosus]	90.82	0	sp|P50433|GLYM_SOLTU	Serine hydroxymethyltransferase, mitochondrial OS=Solanum tuberosum PE=2 SV=1	At4g37930	908	0	KOG2467	Glycine/serine hydroxymethyltransferase	E	Amino acid transport and metabolism	K00600|1|0.0|947|pda:103721738|glycine hydroxymethyltransferase [EC:2.1.2.1]	GO:0006545//glycine biosynthetic process;GO:0035999//tetrahydrofolate interconversion	GO:0008168//methyltransferase activity;GO:0004372//glycine hydroxymethyltransferase activity;GO:0030170//pyridoxal phosphate binding	-
2926	PB.46203.1|m.23659	type:confident-complete len:147 strand:+ pos:68-508	15461.9	0.11	1	5	PB.74207.1|m.24736;PB.74433.1|m.36966;PB.73487.1|m.23326;PB.73487.4|m.206142;PB.65711.1|m.23484;PB.61855.1|m.7594;PB.46203.2|m.23705;PB.65711.3|m.178896;PB.65711.5|m.184193;PB.72799.1|m.24790;PB.65711.4|m.181788;PB.46203.4|m.183192	1.27	1.812|1.187|0.807	0.507	4|5|3	0.007|0.913|0.403	MDAPKKKGVAGRRGGGPKKKSVTRSVKAGLQFPVGRIGRYLKKGRYAKRVGSGAPVYLAAVLEYLAAEVLELAGNAAKDNKKSRIVPRHVLLAVRNDEELGKLLAGVTIAHGGVLPNINPVLLPKKTKEPKEPKSPTKGAKSPKKA	87.413	6e-83	XP_020193428.1	histone H2A-like [Aegilops tauschii subsp. tauschii]	82.12	7e-79	sp|P02277|H2A3_WHEAT	Histone H2A.2.2 OS=Triticum aestivum PE=1 SV=1	At5g02560	218	1e-73	KOG1756	Histone 2A	B	Chromatin structure and dynamics	K11251|1|1e-83|246|ats:109779228|histone H2A		GO:0003677//DNA binding;GO:0046982//protein heterodimerization activity	GO:0005634//nucleus;GO:0000786//nucleosome
2945	PB.1644.27|m.90349	type:confident-complete len:444 strand:+ pos:5-1336	50442.7	0.124	5	8	PB.887.9|m.96678;PB.887.8|m.81578;PB.1644.29|m.99886;PB.1644.51|m.140567;PB.1644.52|m.137162;PB.887.10|m.95807;PB.1644.34|m.111307;PB.1644.36|m.112840;PB.1644.38|m.117559;PB.1644.4|m.10716;PB.1644.47|m.132310;PB.1644.17|m.32245;PB.1644.37|m.113299;PB.1644.48|m.135002;PB.1644.8|m.16166;PB.1644.15|m.26543;PB.1644.39|m.120493	1.11	1.474|0.856|0.990	0.325	8|7|8	0.011|0.238|0.961	MGLLLLQVFYFLDWVKYMLNDAKLFQSFLRITLTCTISVGILALGVGMATGFISPWTGRFYSLLDPTYAKDHIPIIASVSEHQPTAWSSFMFDFHILLFLFPAGLYFCFKRLSDATIFIIMYGLTSMYFAGVMVRLILVATPAVCLISAIAVSATIKNLTSLLRAKSKAPTAASSKATSSLKASTKAAQQYDQSLPYQRNAAILLLIGALYWCSRYVIHCTWVTSEAYSSPSIVLAARGARGDRVIFDDYREAYYWLRQNTPSDAKVMSWWDYGYQITAMGNRTVIVDNNTWNNTHIATVGRAMSSYEDEAYEIMRSLDVDYVLVVFGGVTGYSSDDINKFLWMVRIGGGVFPVIKEPDYLVNGEYRVDKGAAPKMLNCLMYKLCYYRFGELQTEYGKP…	91.837	0	XP_020273386.1	LOW QUALITY PROTEIN: dolichyl-diphosphooligosaccharide--protein glycosyltransferase subunit STT3B [Asparagus officinalis]	88.37	0	sp|Q7XQ88|STT3B_ORYSJ	Dolichyl-diphosphooligosaccharide--protein glycosyltransferase subunit STT3B OS=Oryza sativa subsp. japonica GN=STT3B PE=2 SV=2	At1g34130	757	0	KOG2292	Oligosaccharyltransferase, STT3 subunit	O	Posttranslational modification, protein turnover, chaperones	K07151|1|0.0|830|aof:109848348|dolichyl-diphosphooligosaccharide---protein glycosyltransferase [EC:2.4.99.18]	GO:0006486//protein glycosylation;GO:0043687//post-translational protein modification;GO:0018279//protein N-linked glycosylation via asparagine	GO:0004576//oligosaccharyl transferase activity;GO:0004579//dolichyl-diphosphooligosaccharide-protein glycotransferase activity	GO:0016021//integral component of membrane;GO:0008250//oligosaccharyltransferase complex
2950	PB.49072.16|m.202318	type:confident-complete len:271 strand:+ pos:29-841	30478.7	0.3	7	11	PB.56304.3|m.73445	1.15	1.402|1.059|0.975	0.226	11|11|11	0.011|0.844|0.941	MAGGGRMPRQPLRDEMQGVHDGPLRPFARGPGSLPPPFHAMEEEIALRHDEIRRRLADNRHMHEENVAMKRDLTTAKEELHALSQAIPKIRADKEAKARELIQMGLKLEAELRSLEPIKAEVLQLQAEARKLDALCHETSTRIQSMSQDLKHLQVENKKIPALKMEVGGLRQELVRARTAYEYEKKANAEQLGQREDIEKNLVSMAREIEKLRTERERMSLEKRPRAPGVGSYVADVGYRGSFGDGYGADKGLYGAGSWGSYESRGLPPH	64.469	3e-118	XP_008800766.1	PREDICTED: protein FLX-like 3 [Phoenix dactylifera]	38.55	2e-45	sp|Q9C717|FLXL3_ARATH	Protein FLX-like 3 OS=Arabidopsis thaliana GN=FLXL3 PE=1 SV=1	-	-	-	-	-	-	-	K03257|1|3e-33|130|nto:104095355|translation initiation factor 4A!K13207|5|2e-08|58.9|smo:SELMODRAFT_446372|CUG-BP- and ETR3-like factor	-	-	-
2981	PB.53020.1|m.54110	type:suspicious-NA len:274 strand:+ pos:398-1219	30093.9	0.223	4	10	-	1.53	1.385|1.414|1.784	0.222	9|10|10	0.028|0.258|0.089	MWGREEKENFQAPAPIDWRQKGAVTSVKNQGACGWCWAFGATGAIEGINAITTGRLISVSEQQIVDCSEGTRTADAYKWVISNGGIATDVDYPFIGKKGTCNKNKPKAATIDGYQEVYKFEISLLETVAKQPVVVLIDASSKDFQQYSGPGIFEGKSCTDDPNSVNHGVLIVGYGSNGANADYWIVKNSWGTQWGINGYIHIKRNTNRPNGVCGINYWGSYPTKKVSHFGQTLQNNGDIVGVATAQKKESQSRIKPSSKSTGDESWACIIMLK	58.772	3e-84	OAY83207.1	Cysteine proteinase RD21a [Ananas comosus]	50.43	2e-67	sp|P22895|P34_SOYBN	P34 probable thiol protease OS=Glycine max PE=1 SV=1	At1g09850_1	217	9e-69	KOG1543	Cysteine proteinase Cathepsin L	O	Posttranslational modification, protein turnover, chaperones	K16290|1|1e-76|240|nnu:104609764|xylem cysteine proteinase [EC:3.4.22.-]		GO:0008234//cysteine-type peptidase activity	-
3063	PB.66574.3|m.32813	type:confident-complete len:124 strand:+ pos:69-440	14203.4	0.252	3	5	PB.66574.4|m.174838;PB.74517.1|m.26069;PB.66574.2|m.32401;PB.66574.6|m.209526;PB.66574.1|m.24646;PB.66574.5|m.176387;PB.12044.3|m.163516	1.07	1.546|0.680|0.979	0.44	4|5|3	0.011|0.268|0.969	MARIKVHELRGKSKADLLNQLKDLKAELALLRVAKVTGGAPNKLSKIKVVRLGIAQVLTVISQKQKEALREVYKKKTFLPLDLRPKKTRAIRRKLTKHQASLKTEREKKREMYFPMRKYAIKA	96.748	7e-78	XP_020275242.1	60S ribosomal protein L35 [Asparagus officinalis]	90.98	4e-74	sp|Q9M5L0|RL35_EUPES	60S ribosomal protein L35 OS=Euphorbia esula GN=RPL35 PE=2 SV=1	At5g02610	208	8e-71	KOG3436	60S ribosomal protein L35	J	Translation, ribosomal structure and biogenesis	K02918|1|1e-78|231|aof:109849779|large subunit ribosomal protein L35e	GO:0006412//translation	GO:0003735//structural constituent of ribosome	GO:0005840//ribosome
3069	PB.2193.1|m.4910	type:likely-NA len:627 strand:+ pos:114-1994	67611.9	0.062	1	1	-	1.15	1.576|0.847|1.028	0.38	3|3|3	0.018|0.725|0.960	MESSIKRPIDPTSADSSAAKRRPPPPPEAGDTQFRLLCPSDKTGAVIGKGGSIVRQIREETLSKIRIDDPVPGSDDRVIIISAPSCFSSGRAEESASPAQQALVRVFERVLEEEKEATCRLLVASSQVGSVLGKGGKVVERIRVESGAQIRVLTGDHVPACAAAGDELIQITGSFTAVRKALLSVSSCLQDNTRTEPSNFSTTKLYGSSFHGSTLPAPLDLHAQRSYLPSLPDHHSRAYSLNPGVDNVASGHRKVQEEDIMFRMICSNERVGSIMGKGGVIIRALQSETGASIKVLDALSNLDERIIVISARENSEIKHSYAQDALLRVHTRLTEAVVDRGPLVSARLIVPAQQIGCLLGRGGCIIADMRRVTGANIRIFSKEQIPKCSLPNDEVVQVI…	55.188	0	XP_010927252.1	PREDICTED: KH domain-containing protein HEN4 [Elaeis guineensis]	29.43	4e-75	sp|Q8W4B1|RCF3_ARATH	RNA-binding KH domain-containing protein RCF3 OS=Arabidopsis thaliana GN=RCF3 PE=1 SV=1	At1g51580	316	4e-99	KOG2190	PolyC-binding proteins alphaCP-1 and related KH domain proteins	AR	RNA processing and modification;General function prediction only	K21444|1|0.0|689|egu:105049327|poly(rC)-binding protein 3/4		GO:0003723//RNA binding	-
3173	PB.43913.12|m.188532	type:suspicious-NA len:269 strand:+ pos:2-808	27833.2	0.142	2	2	PB.43913.4|m.44711;PB.44910.1|m.97833;PB.43913.11|m.84712;PB.44910.2|m.106770;PB.44910.1|m.97834	1.4	2.148|1.096|0.959	0.651	2|2|2	0.026|0.935|0.960	TTGDFSTETLTFRGGSRVPRVALGCGHDNEGLFVAAAGLLGLGRGPLSFPAQAGQRFGGQRFSYCLVDRTSASSANATKSSSVIFGAAAVPRSRLAVFTPMIRNPKMDTFYYVDLVGVSVGGTRVSGVIASDLKLDPATGKGGVIVDSGTSVTRLARPAYVALRDAFRSGASGLKLSAGGFSLFDTCYDLGGKSEVKVPTVVMHFGGGAEVSLPAGNYLIPVDAKGTFCFAFAGTDAGVSIIGNIQQQGFRVIFDGAGNRVGFLPRGC	79.182	2e-141	XP_009394177.1	PREDICTED: aspartyl protease family protein 2-like [Musa acuminata subsp. malaccensis]	70.52	7e-110	sp|Q9LNJ3|APF2_ARATH	Aspartyl protease family protein 2 OS=Arabidopsis thaliana GN=APF2 PE=2 SV=1	At1g01300	325	1e-109	KOG1339	Aspartyl protease	O	Posttranslational modification, protein turnover, chaperones	K22683|1|4e-142|412|mus:103979717|aspartyl protease family protein [EC:3.4.23.-]	GO:0006508//proteolysis;GO:0030163//protein catabolic process	GO:0004190//aspartic-type endopeptidase activity	-
3181	PB.3052.1|m.208391	type:suspicious-NA len:748 strand:+ pos:1927-4170	84581.1	0.309	5	7	PB.520.16|m.21136;PB.520.106|m.160945;PB.520.90|m.155488;PB.520.84|m.153216;PB.520.23|m.23997;PB.520.96|m.152273;PB.520.78|m.150873;PB.520.112|m.166053;PB.520.94|m.157723;PB.3751.2|m.218553	1.5	2.497|0.982|1.019	0.864	6|7|7	0.007|0.984|0.973	MRRPYQTKTFKVELSFASKIPMHALASALKGIDSEMSQEALRVLDIILRQNAAKQGCLLVRQSFFQNNPSNFTDLGGGVLGCRGFHSSFRTAQGGLSLNIDVSTTMIVRPGPVADFLVANQNVRDPFQVDWAKAKRTLKNLRVKVAPSNTEYKIVGLSELPCSQQMFTLKQRNRDDNGDSDVQTLEITVYDYFVKHRNIELKYSGDLPCINVGKPKRPTFFPLELCSLVSLQRYTKALTTLQRSSLVEKSRQKPQERMTTLTNALKCSNYDADPMLRACGVSISTQFTQVDGRVLQPPKLKVGNGEDFQPRNGRWNFNNKKLFEPTQVDKWAVVNFSARCDMKSLVRDLIKCGNLKGISIEEPFVVLDENSNMRRAPPPARVENMFEQIKSKLPGAPKF…	84.739	0	XP_020274159.1	protein argonaute 4B-like [Asparagus officinalis]	74.83	0	sp|Q9SDG8|AGO4A_ORYSJ	Protein argonaute 4A OS=Oryza sativa subsp. japonica GN=AGO4A PE=2 SV=1	At2g27040	1143	0	KOG1041	Translation initiation factor 2C (eIF-2C) and related proteins	J	Translation, ribosomal structure and biogenesis	K11593|1|0.0|1350|aof:109848861|eukaryotic translation initiation factor 2C	GO:0031047//gene silencing by RNA	GO:0003743//translation initiation factor activity	-
3236	PB.13969.4|m.195018	type:confident-5partial len:238 strand:+ pos:1-714	27377.2	0.262	3	6	PB.67810.2|m.189076;PB.13969.2|m.157243	1.26	1.783|1.065|0.931	0.458	9|8|9	0.020|0.799|0.835	VIARVQERMGSLKIFGLPASTDVSRVLTCLFEKDVEFQLIRTDTYKKDHKVPEFLRLQDPSGQVTMKDGLMTLVDSREICRHIAEKYPDKGNKALFGTGTLERASIEQWLQSEARNFDPPSKNLVFHLAFAEAMGIIPDEDQIERNVKKLSNILDVYNKRLEASRFLAVDVFTLADLSHLPNAHYLVERSERGRKLFLSRENVARWWQTISSRASWRQVVNMHSEHPGPLEKFTTID	78.166	1e-135	ANH58193.1	glutathione S-transferase [Dracaena cambodiana]	40.19	1e-46	sp|O80852|GSTF9_ARATH	Glutathione S-transferase F9 OS=Arabidopsis thaliana GN=GSTF9 PE=1 SV=1	At2g30860	154	2e-46	KOG0867	Glutathione S-transferase	O	Posttranslational modification, protein turnover, chaperones	K00799|1|3e-134|380|aof:109826045|glutathione S-transferase [EC:2.5.1.18]	GO:0006749//glutathione metabolic process	GO:0004364//glutathione transferase activity	GO:0005737//cytoplasm
3244	PB.425.28|m.142376	type:confident-5partial len:788 strand:+ pos:3-2366	90086.3	0.334	2	2	-	1.28	1.796|0.887|1.157	0.467	3|3|3	0.007|0.811|0.575	ALFSRLVKQGKGMLQPHQLFAEYEAVIPENERQKLKDGAFEDVLRAAQEAIIMPPWVALAIRPRPGVWEYVRVNVNELAVEELSIPEYLKFKEELVNGSAKENFVLELDFEPFNANVPRPSLSKSIGNGVQFLNRHLSAKLFHDRESMYPLLNFLRAHHYKGTTMMLNDRIESLGALQSTLRKAEKYLLSIPQDTPYSNFHHRFQELGLEKGWGDTAQRVHETIHLLLDLLEAPDPCTLETFLSTIPMVFNVVILSPHGYFAQANVLGYPDTGGQVVYILDQVRALESEMLLRIKHQGLDIIPKILIVTRLLPDAVGTTCGQRLEKVLGTEHTHILRVPFRTEKGILRKWISRFEVWPYLETYTEDVANELASELQATPDLIIGNYSDGNLVASLLAHK…	89.835	0	AMN16535.1	sucrose synthase [Ornithogalum longebracteatum]	86.11	0	sp|Q41607|SUS2_TULGE	Sucrose synthase 2 OS=Tulipa gesneriana PE=2 SV=1	At3g43190	1262	0	KOG0853	Glycosyltransferase	M	Cell wall/membrane/envelope biogenesis	K00695|1|0.0|1477|aof:109845351|sucrose synthase [EC:2.4.1.13]	GO:0005985//sucrose metabolic process	GO:0016157//sucrose synthase activity	-
3257	PB.54310.2|m.64900	type:suspicious-NA len:307 strand:+ pos:183-1103	33817.3	0.278	8	13	PB.54310.1|m.9355	1.13	1.354|0.965|1.062	0.202	10|11|13	0.007|0.873|0.765	MAAASKEEARVPQIVPPPPSPVSKFKIALCQLSVTADKQRNIAHARKAIEEAAGRGAQLVLLPEIWNSPYSNDSFPIYAEDIEAGGDSAPSYSMLSEAARTLQITIIGGSIPERSGDKLFNTCCVFGKDGNLKGKHRKIHLFDIDIPGKITFKESKTLTAGQHPTIVDTDVGRIGIGICYDIRFQELAMLYAARGAHLICYPGAFNMTTGPLHWELLQRARAADNQLFVATCSPARDAGSGYIAWGHSTLVGPFGEVIATTEHEETIIVEEIDYSQIELRRSNLPLEKQRRGDLYQLVDVQRASTH	88.235	0	XP_008797647.1	PREDICTED: omega-amidase, chloroplastic [Phoenix dactylifera]	80.74	0	sp|Q8RUF8|NILP3_ARATH	Omega-amidase, chloroplastic OS=Arabidopsis thaliana GN=NLP3 PE=1 SV=1	At5g12040	501	2e-180	KOG0806	Carbon-nitrogen hydrolase	E	Amino acid transport and metabolism	K13566|1|0.0|567|pda:103712796|omega-amidase [EC:3.5.1.3]	-	-	-
3295	PB.46142.1|m.17982	type:confident-complete len:346 strand:+ pos:138-1175	39127.8	0.171	5	7	-	1.2	1.353|1.209|1.049	0.152	6|6|7	0.007|0.433|0.740	MARPKSGLLLFAFFLSHVLYAIGGKSYYDVLEVPKGASDEQMKRAYRKLALKYHPDKNPGNEEANKRFAEINNAYEVLTDPEKRNIYDKYGEEGLKQHAGSGGRGGGMNMQDIFSTFFGGGGGGGEEEEKIPKGDDVVVELHATLEDLYMGGSLKVWREKNVIKTAPGKRRCNCRNEVHHRQIAPGMFQQMTEQVCEQCQNVKFEREGYFITVDIEKGMQDGQEVLFYEDGEPKIDGEAGDLKFRIQTAPHELFRREGNDLHTSVTISLLQALVGFEKTIKHLDEHLVEIGTKGVTKPKEVRKYKGEGMPLHLSMKKGDLYVTFEVLFPKSLTEDQKSKIRTILS	85.337	0	XP_009383732.1	PREDICTED: dnaJ protein ERDJ3B [Musa acuminata subsp. malaccensis]	81.93	0	sp|B9FHF3|DJB6_ORYSJ	DnaJ protein ERDJ3B OS=Oryza sativa subsp. japonica GN=ERDJ3B PE=1 SV=1	At3g62600	526	0	KOG0713	Molecular chaperone (DnaJ superfamily)	O	Posttranslational modification, protein turnover, chaperones	K09517|1|0.0|606|mus:103971438|DnaJ homolog subfamily B member 11	GO:0006457//protein folding	GO:0051082//unfolded protein binding	-
3337	PB.11749.11|m.43617	type:confident-5partial len:277 strand:+ pos:1-831	29907.4	0.366	2	3	PB.11749.15|m.52436;PB.11749.22|m.74521;PB.11749.23|m.75013;PB.11749.13|m.48622;PB.11749.1|m.2809;PB.11749.18|m.67284;PB.11749.16|m.53305;PB.11749.17|m.65427;PB.11749.8|m.11660	1.43	2.167|1.027|1.092	0.64	3|3|3	0.007|0.987|0.779	ASVSQNLSNLKPGSLYCLTFSASRTCAQDETLRVSVFPLSADLPLQTLYDSFGGDTYAVGFRPVNATATVIFRNTGVQEDPACGPLLDAVAIKELFPPFPTRDNLVKNGGFEEGPHVFKNSTSGILLPPKQQDAVSPLPGWIIESLKAVKFLDKAHFAVPYGQYAVELVAGRESAIAQVIRTVPNKSYNLTFAVGDAKNGCHGSMLVEVFVGNSTAKVPFTSKGKGGYTIGSLKFKAVGPRTRLTFFSSYYHTKAHDTVSLCGPILDQVRVYPVSS	76.087	4e-155	XP_009418805.1	PREDICTED: uncharacterized protein LOC103998920 [Musa acuminata subsp. malaccensis]	-	-	-	-	-	-	-	-	-	-	-	K03097|1|6e-16|78.6|aip:107632886|casein kinase II subunit alpha [EC:2.7.11.1]	-	-	-
3383	PB.31084.1|m.373	type:confident-5partial len:679 strand:+ pos:1-2037	75771.8	0.118	1	1	-	1.02	1.417|0.914|0.726	0.357	4|4|4	0.043|0.815|0.412	IPNPQTEKRMALSKSLFLPRLKTLNPFHPNLRLPPPSIRLLSFATPEEAAAERRRRKRRLRIEPPLSSLRHQQQQQRIPSKPNANNPNAPKLPEPLSSLSGNRLTLHNRILALIRSDDLDEASLLTRHSIYSNCRPTVFTCNAVLLALLRGSRYSDLLSLHRFITQASVAPTVVTHNLLLQAYCDCRKTDTALEHYRLIVKDDSPVSPSPTTYRILVKGLVDCSKIEQAVELKDDMLAKGLCRPDPTVYNLLMSGFIKKSEPDPERVLALYDELKENLGGGQVLDGIVYGNLMKGFFKKGAEEEAMKVFGEVLGEGAEVRFNAVSYNLVLDALGSNGKLDEAVKLFDRMCREHEPPRRISVNLGSFNVMVDAYCAEKKFDDAIRVFSGMGEKKCCPDTL…	66.619	0	XP_008799612.1	PREDICTED: pentatricopeptide repeat-containing protein At3g49240-like [Phoenix dactylifera]	51.18	0	sp|Q9M3A8|PP273_ARATH	Pentatricopeptide repeat-containing protein At3g49240, mitochondrial OS=Arabidopsis thaliana GN=EMB1796 PE=1 SV=1	At3g49240	577	0	KOG4197	FOG: PPR repeat	R	General function prediction only	K17710|1|2e-43|166|smo:SELMODRAFT_103638|pentatricopeptide repeat domain-containing protein 1	GO:0009451//RNA modification	GO:0004519//endonuclease activity;GO:0003723//RNA binding	GO:0043231//intracellular membrane-bounded organelle
3414	PB.71606.2|m.35546	type:confident-complete len:193 strand:+ pos:103-681	21449.6	0.125	2	6	PB.71606.1|m.28854	1.07	1.341|0.855|1.008	0.248	5|5|5	0.045|0.630|0.982	MASVKKASEVAALLDLKSHPEGGYYCETFRDSSIFLSKSQLPPQYKVNRPVSTSIYFLLPSGSVSHLHRIPCAETWHFYMGEPLTVFELHDDGHIELTDLGSDLGKGQRPQYTVPPNVWFGSFPTLDVASFSSDGSVLAKAESRDPELHYSLVGCTCAPAFQFEDFELATFSQIIPIAPKAEPFLKYLADSN	84.375	5e-117	XP_020269786.1	uncharacterized protein LOC109845015 [Asparagus officinalis]	-	-	-	-	-	-	-	-	-	-	-	K09705|1|9e-118|335|aof:109845015|uncharacterized protein	-	-	-
3428	PB.38871.20|m.198712	type:confident-5partial len:242 strand:+ pos:3-728	26808.9	0.353	7	12	PB.38871.5|m.30684;PB.38871.18|m.189052;PB.38871.4|m.24388;PB.38871.11|m.49496;PB.38871.16|m.90108;PB.38871.1|m.8302;PB.38871.3|m.16720;PB.38871.15|m.71651;PB.38871.13|m.66231	1.27	1.572|1.086|1.157	0.263	12|12|12	0.007|0.811|0.397	GDNKVVVEPHKHEGVFIAKGKEDALCTRNMVPGEAVYGEKRVSVQNEDGTKVEYRVWNPFRSKLAAAILGGVDNIHIKPGARVLYLGAASGTTVSHVSDLVGPTGMVYAVEFSHRSGRDLVNMAKKRTNVIPIIEDARHPAKYRMLVGMVDVIFSDVAQPDQARILALNASFYLRNEGYFVISIKANCIDSTVPAEHVFAQEVKKLQAEQFKPKEQVTLEPFERDHACVVGQYRVAKKQKA	92.469	5e-162	XP_011084445.1	mediator of RNA polymerase II transcription subunit 36a [Sesamum indicum]	88.33	3e-157	sp|Q9FEF8|MD36B_ARATH	Probable mediator of RNA polymerase II transcription subunit 36b OS=Arabidopsis thaliana GN=MED36B PE=1 SV=1	At5g52470	438	7e-157	KOG1596	Fibrillarin and related nucleolar RNA-binding proteins	A	RNA processing and modification	K14563|1|8e-163|456|sind:105166694|rRNA 2'-O-methyltransferase fibrillarin [EC:2.1.1.-]	GO:0008033//tRNA processing;GO:0006364//rRNA processing	GO:0008168//methyltransferase activity;GO:0003723//RNA binding	-
3476	PB.74431.2|m.182325	type:confident-complete len:120 strand:+ pos:77-436	12457.4	0.513	1	4	PB.74431.1|m.37074;PB.11566.1|m.31692	1.75	1.013|3.118|1.109	1.189	4|3|4	0.980|0.030|0.618	MARQVALFSLLVIIAAFFLISTPRVESAVTCGTVANAVSPCINYIRGAGPLTGACCGGVKGLNAAANTTPARQTACNCLKSLAGRISGLNAGLARGLPGRCGVNVPFVISTSTDCTKVR	74.444	4e-42	ADB12472.1	lipid transfer protein, partial [Crocus sativus]	50.41	9e-36	sp|Q43129|NLTP2_GOSHI	Non-specific lipid-transfer protein OS=Gossypium hirsutum PE=2 SV=1	-	-	-	-	-	-	-	-	-	-	-
3575	PB.74094.2|m.24464	type:likely-NA len:135 strand:+ pos:2-406	16046.6	0.366	5	30	PB.74094.1|m.25460	1.1	1.016|1.038|1.237	0.122	29|29|29	0.924|0.913|0.033	NPRKTNRKSEMASSSWLQSFLNPRKNFLARIHRNTVSRRLKNYGLRYDDLFDPMEDLDIKEALARLPREIVDARNQRLKRAMDLSMKHLYLPEELRAKQTPFRYYLQDMLKLVKKERAEREALGALPLYQRTLP	79.675	6e-66	XP_008802707.2	PREDICTED: LOW QUALITY PROTEIN: cytochrome b-c1 complex subunit 7-2-like [Phoenix dactylifera]	77.69	3e-64	sp|F4JWS8|QCR72_ARATH	Cytochrome b-c1 complex subunit 7-2 OS=Arabidopsis thaliana GN=QCR7-2 PE=1 SV=1	At5g25450	191	6e-64	KOG3440	Ubiquinol cytochrome c reductase, subunit QCR7	C	Energy production and conversion	K00417|1|1e-66|201|pda:103716478|ubiquinol-cytochrome c reductase subunit 7	GO:0006122//mitochondrial electron transport, ubiquinol to cytochrome c		GO:0005750//mitochondrial respiratory chain complex III
3720	PB.65315.2|m.40389	type:confident-complete len:225 strand:+ pos:39-713	24948.9	0.321	5	13	PB.65315.3|m.194943	1.29	1.814|0.965|1.102	0.456	13|13|13	0.007|0.938|0.739	MAEVKLIGATASPFVLRPRIALNLKGVEYEFLVETLGGKSELLLKSNPVYKKIPVLIHGDKPICESLIIVEYIDEAWEGHSILPSDAYDRANARFWAVYLDDKWFPTFRGLRNAPTDEARAEGMAQVAEGLRLLEGVFEKSSKGKAFFGGDSIGYLDIAFGSYLGWIRAMEKMSGAKILDEAKTPLLTSWAEHFCSDAAVKEVMPETDTLIEFAKLLAKFQSAK	70.089	6e-109	XP_008775859.1	PREDICTED: glutathione S-transferase U17-like [Phoenix dactylifera]	64.81	3e-95	sp|Q9FUS8|GSTUH_ARATH	Glutathione S-transferase U17 OS=Arabidopsis thaliana GN=GSTU17 PE=2 SV=1	At1g10360	268	3e-91	KOG0406	Glutathione S-transferase	O	Posttranslational modification, protein turnover, chaperones	K00799|1|1e-109|318|pda:103696108|glutathione S-transferase [EC:2.5.1.18]	GO:0009407//toxin catabolic process;GO:0006749//glutathione metabolic process	GO:0016740//transferase activity;GO:0004364//glutathione transferase activity	GO:0005737//cytoplasm
3767	PB.32171.1|m.10105	type:suspicious-NA len:477 strand:+ pos:3-1433	52976.5	0.179	4	5	PB.32171.7|m.93790	1.33	1.447|1.182|1.363	0.135	5|4|5	0.022|0.522|0.740	YQSSIPPSFFPQLIPMAASLDQGQVKNVLRQVEFYFSDSNLPRDNFLTKSVEESEDGLVSLALICSFTRMRGHLGLGSVKQEEVPEETVLAVAETLRKSTLLRVSEDGKRIGRSTELPKPEAVIVQVDSRTIAVSPLPHDVKIEDVESFFGQHAKVNSVRLPRLVGDKRCFCGTALIEFSEEEDAKKVLNESLTYADAVLEMKPKKDFDAERENQKEEFERTRPDKNTSSGSYPKGLILSFKLKSIPVEESTEQNVQDKANAEDVSETNGNELEGKGKNSEDAQKKNDQMTVEDQTTTGKKEEPSENVEKGSVEGAAEGHSDDVRKENSLEDAKNGEKAAGDDNNAVTREDIRELLQKFGIVKYIDFRMGEESGYVRFEDSDAAAKACAAAVLTDVGGL…	61.392	2e-177	XP_020261107.1	la protein 1-like [Asparagus officinalis]	47.49	5e-119	sp|Q93ZV7|LA1_ARATH	La protein 1 OS=Arabidopsis thaliana GN=LA1 PE=1 SV=1	At4g32720	321	1e-104	KOG0118	FOG: RRM domain	R	General function prediction only	K11090|1|3e-178|511|aof:109837326|lupus La protein	-	-	-
3773	PB.63829.2|m.30410	type:confident-5partial len:250 strand:+ pos:3-752	27906.4	0.165	1	4	-	1.16	1.611|0.779|1.076	0.422	4|4|4	0.007|0.202|0.760	LLPPFPRVLGFLPFPSMAPTSKPRVSSRNPDLVRGIGKFSRSKMYHKRGIWAIKAKNGGKFPKHEPKPSSDKPAEKAPKFYPADDVKKPIANRRKPKPTKLRASITPGTVLILLAGRFMGKRVVFLKQLPSGLLLVTGPFKVNGVPLRRVSQSYVIGTSTKLDITGVNVEKFDDKYFSKETEKKKKKTEGEFFETEKEEKKTLPQDKKDDQKAVDGQLLKAIEAVPELKAYLGARFTLRSGMKPHELVF	85.408	6e-138	XP_020261456.1	LOW QUALITY PROTEIN: 60S ribosomal protein L6-2-like [Asparagus officinalis]	79.91	2e-127	sp|P34091|RL6_MESCR	60S ribosomal protein L6 OS=Mesembryanthemum crystallinum GN=RPL6 PE=2 SV=1	At1g74050	330	4e-115	KOG1694	60s ribosomal protein L6	J	Translation, ribosomal structure and biogenesis	K02934|1|1e-138|392|aof:109837539|large subunit ribosomal protein L6e	GO:0006412//translation	GO:0003735//structural constituent of ribosome	GO:0005840//ribosome
3787	PB.36509.3|m.13842	type:suspicious-NA len:393 strand:+ pos:1-1179	41566.5	0.286	4	5	-	1.34	1.357|1.271|1.386	0.06	5|5|4	0.260|0.519|0.050	LCEESRARIKILDGPQGAHERAVMVSAKEEQDASISPAMDGLLKLHRRIVDGLDKEPGQAPAADSVAVTRLLVAATQAGSLIGKQGAKIKSIQEASNCVVRILDDLPPVALQDDRVVEVQGEPTGVHKALELISTHLRKFLVDRSVLPLFEMHIQMPHPHMEQHMPPPQPWGPPQRLPPNAGGNPGYGSNPGYGGNPGYGGNPGYGGNPVYGNPQFMPPRPHDNFYPPPELPPFEKPPHHGISTYGRDAPPMGGPPSANHQPPTMASQVTQHLQIPLSYADAVIGNAGASISYIRRASGATVTIQETRGVPGEMTVEITGSATQVQTAQQLVQNFMAEAGAPAQSNMGSVDQGYNSYQAHGPTYSAPQTNAGLPSYPGSGYGAAAYGTNYGY	67.513	6e-180	XP_010905450.1	PREDICTED: flowering locus K homology domain [Elaeis guineensis]	59	2e-137	sp|Q9SR13|FLK_ARATH	Flowering locus K homology domain OS=Arabidopsis thaliana GN=FLK PE=1 SV=1	At3g04610	404	4e-137	KOG2190	PolyC-binding proteins alphaCP-1 and related KH domain proteins	AR	RNA processing and modification;General function prediction only	K21444|1|1e-180|513|egu:105032648|poly(rC)-binding protein 3/4		GO:0003723//RNA binding	-
3835	PB.52772.1|m.9506	type:confident-complete len:370 strand:+ pos:1-1110	40562.4	0.249	2	9	-	1.1	1.210|0.973|1.105	0.119	9|9|9	0.032|0.977|0.749	MAMAFRVSLRNLVPSRYLLRRRGSASAIQSISTNLSPPSRGVVYEQHGSPDQVTRVIDLAPVEIKENDVCVRMLASPINPSDINRIEGVYPVRPPVPAIGGYEGVGEVHAIGSAVSSLAVGDWVIPSPPSSGIWQTYVVKEENVWHKISKDVPIEYAATITVNPLTALLMLEDFVKLNSGDSIVQNGATSIVGQCIIQLAKVQGTNSINLIRDRVGSEEVKEKLKKLGAHEVFTESQLDVKNVKSLLDGLPEPVLGFNCIGGNAASLVLKFLRQGGTMVTYGGMSKKPITVSTSSFIFKDLALRGFWLQKWMGTERAKECRPRIDYLLSLVRSDKLKYETELVPFHDFGLGLDKALGKVGSHPKQVIRF	77.568	0	XP_010922492.1	PREDICTED: probable trans-2-enoyl-CoA reductase, mitochondrial [Elaeis guineensis]	75.5	0	sp|Q8LCU7|MECR_ARATH	Enoyl-[acyl-carrier-protein] reductase, mitochondrial OS=Arabidopsis thaliana GN=At3g45770 PE=1 SV=1	At3g45770	544	0	KOG0025	Zn2+-binding dehydrogenase (nuclear receptor binding factor-1)	KC	Transcription;Energy production and conversion	K07512|1|0.0|598|egu:105045788|mitochondrial trans-2-enoyl-CoA reductase [EC:1.3.1.38]		GO:0016491//oxidoreductase activity	-
3836	PB.6704.10|m.204033	type:confident-complete len:293 strand:+ pos:82-960	31544.6	0.103	2	2	PB.6704.9|m.198197	1.48	2.305|0.775|1.356	0.772	2|2|2	0.018|0.795|0.417	MSTKEEPRIFVGGLSWETSERHLEDAFGRFGKVVEAQIMQERDTGRPRGFGFVTFSDRRAVEDAIREMHNQELDGRTISVNKAQPKMASDDRGYGYGGGGGGGYSGGARGGSRDGPPPGRTDCFKCGRPGHWARECPSSGGGGGKFSSRSRFGDGGGGRGDRYGSGDRYVDDRYDGGRYGDRDRVDSRDSSRYGSSGRDRYASDRYGGGDRSAGGSDRYGGPPDRYPQNGYSKEKSYDRDVGPRGVGSGGSDRYGGGGGGPARYEGGGYRERAGPYDRPSRGGRPSSYDDRY	66.562	7e-108	XP_009398392.1	PREDICTED: glycine-rich RNA-binding protein RZ1C [Musa acuminata subsp. malaccensis]	53.77	2e-72	sp|Q8RWN5|RZ1C_ARATH	Glycine-rich RNA-binding protein RZ1C OS=Arabidopsis thaliana GN=RZ1C PE=1 SV=1	At5g04280	225	3e-72	KOG0118	FOG: RRM domain	R	General function prediction only	K12885|1|1e-108|321|mus:103982997|heterogeneous nuclear ribonucleoprotein G		GO:0003723//RNA binding;GO:0008270//zinc ion binding	-
3896	PB.74572.2|m.186558	type:confident-5partial len:119 strand:+ pos:1-357	12964.2	0.28	3	9	PB.74991.1|m.173295;PB.74991.2|m.206252	1.2	1.146|1.271|1.174	0.066	9|8|8	0.396|0.030|0.241	NRETVDPRVSSNSSIPFRSPLLHGGNTTPAMSSSAKSGNLPQAQSEELQSTADMTQFVQTLLNQMQTRFQGMSENIVSKIDEMGSRIDELEQSINDLKMEMGADTPNKSKLEESKPTE	72.414	2e-31	XP_020274897.1	heat shock factor-binding protein 1-like [Asparagus officinalis]	-	-	-	-	Hs4557647	61.2	2e-13	KOG4117	Heat shock factor binding protein	KO	Transcription;Posttranslational modification, protein turnover, chaperones	K19765|1|3e-32|112|aof:109849468|heat shock factor-binding protein 1	GO:0048316//seed development;GO:0070370//cellular heat acclimation	GO:0003714//transcription corepressor activity	GO:0005794//Golgi apparatus;GO:0005634//nucleus;GO:0005829//cytosol
3903	PB.61082.3|m.209938	type:confident-5partial len:174 strand:+ pos:3-524	19606	0.254	2	9	PB.61082.2|m.183929	1.01	0.768|1.173|1.085	0.213	9|6|8	0.028|0.274|0.483	ITEKKTKSLEMDFRVMGLDAPMLSALHQLMEDVSGSDSSLEKEKATGPTRSYVRDATAMAYTPLDIKELPESYVFLVDMPGVKSGEIRVQVEDDNLLVITGERKREDDRDQHHKYLRMERRMGKFMRKFSLPENVDTENGISAICQDGVLTVAVQKKPPPEPKKPKTIEVKIA	66.258	3e-65	XP_015935030.1	17.9 kDa class II heat shock protein [Arachis duranensis]	63.19	9e-61	sp|P05477|HSP21_SOYBN	17.9 kDa class II heat shock protein OS=Glycine max GN=HSP17.9-D PE=3 SV=1	At5g12020	155	1e-48	KOG0710	Molecular chaperone (small heat-shock protein Hsp26/Hsp42)	O	Posttranslational modification, protein turnover, chaperones	K13993|1|6e-66|202|aip:107606291|HSP20 family protein	-	-	-
3998	PB.51404.2|m.7288	type:confident-complete len:355 strand:+ pos:101-1165	38903.6	0.48	2	6	PB.51404.1|m.9400;PB.51404.4|m.19836;PB.44155.4|m.75582	1.14	1.315|1.124|0.971	0.172	5|6|6	0.030|0.829|0.960	MSLLSDLLNLNISDSSGKIIAEYIWIGGSGMDIRSKARTLTGPITDPSQLPKWNYDGSSTGQAPGEDSEVILYPQAIFKDPFRRGNNILVICDCYTPAGVPIPTNKRANAAKIFSDPKVVAEVPWYGIEQEYTLLQKDVQWPLGWPIGGYPGPQGPYYCGAGADKAFGRDIVDAHYKACLYAGINISGINGEVMPGQWEFQVGPAVGISAGDELWAARYILERITEIAGVVLSFDPKPIKGDWNGAGAHANYSTKSMREDGGYEIIKKAIEKLSLRHKEHISAYGEGNERRLTGHHETADINTFKWGVANRGASIRVGRDTEKAGKGYFEDRRPASNMDPYVVTSMIAETTILL	91.501	0	AIK03054.1	glutamine synthetase [Eichhornia crassipes]	90.37	0	sp|P32289|GLNA_VIGAC	Glutamine synthetase nodule isozyme OS=Vigna aconitifolia PE=2 SV=1	At5g37600	666	0	KOG0683	Glutamine synthetase	E	Amino acid transport and metabolism	K01915|1|0.0|679|pxb:103959902|glutamine synthetase [EC:6.3.1.2]	GO:0006542//glutamine biosynthetic process	GO:0004356//glutamate-ammonia ligase activity;GO:0005524//ATP binding	-
4024	PB.45412.7|m.94825	type:confident-complete len:404 strand:+ pos:92-1303	45681.2	0.122	4	6	PB.45412.2|m.14569;PB.45412.1|m.3601	1.2	1.317|1.137|1.148	0.101	5|6|6	0.039|0.909|0.516	MAGLSLRCGDCGAQLKSVEEAQEHAELTSHTNFSESTEAVLNLVCSTCGKPCRSKTETDLHTKRTGHTEFADKTLEAATPIDLEAPKPMDVESGGGEMVVPDVDKSLLEQLEAMGFAPARATRALHYSGNSSIEAAINWVAEHEDDPEIDEMPMMSANAKMAANKPSLAPEEVKMKAQELRERARKKKEEEEKRMEREREKERIRVGKELLEAKRIEEDNERKRIMALRKAEKEEEKRAREKIRQRLEEDKAERRRKLGLPPGEPSATKAVAPPVEEKKSFLPIRPATKAERMRDCLRSLKQTHKDEDAKVKRAFQTLLTYVGNVARNPDEEKFRKIRLSNQTFQERIGSLQGGIGFLEACGFQKLEGDEFLFLPRDKVDMAVLNSAGSELNSAIANPF…	76.998	0	XP_002273725.1	PREDICTED: UBX domain-containing protein 4 [Vitis vinifera]	40.68	2e-06	sp|Q9ZU93|PUX2_ARATH	Plant UBX domain-containing protein 2 OS=Arabidopsis thaliana GN=PUX2 PE=1 SV=2	At1g04850	533	0	KOG2699	Predicted ubiquitin regulatory protein	O	Posttranslational modification, protein turnover, chaperones	K11844|1|2e-11|70.9|sind:105171897|ubiquitin carboxyl-terminal hydrolase 16/45 [EC:3.4.19.12]		GO:0003676//nucleic acid binding	-
4197	PB.15323.3|m.7184	type:confident-5partial len:599 strand:+ pos:1-1797	65877.4	0.438	1	1	-	1.18	1.392|1.017|1.122	0.193	5|5|5	0.022|0.989|0.462	KGFAPISSLVESSNRSFRARGNTRHRRQKEREKETSFLYTTMHAPVLVLKDSLKRESGSKVQHANIAASKAVADIIRTTLGPRSMLKMLLDASGGIVVTNDGNAILRELDIAHPAAKSMIELSRTQDEEVGDGTTSVIILAGEMLHVAEAFIDRNFHPTVICRAYNKALEDAIAVLDKIAMPVDVNDRPTILGLVKSCIGTKFTGQFGDLIADLAIEATSTVGVDLGQGLREVDIKKYIKVEKVPGGQLEDSKVLKGVMFNKDVVAPGKMKRKIVNPRIILLDCPLEYKKGENQTNAELVKEEDWEVLLKMEEEYIENLCMQILKFRPDLVITEKGLSDLACHYLSKAGVSAIRRLRKTDNNRIAKATGAVIVNRPDEMQESDVGTGAGLFEVKKIGDE…	93.357	0	XP_010924226.1	PREDICTED: T-complex protein 1 subunit gamma [Elaeis guineensis]	89.23	0	sp|Q84WV1|TCPG_ARATH	T-complex protein 1 subunit gamma OS=Arabidopsis thaliana GN=CCT3 PE=1 SV=1	At5g26360	1018	0	KOG0364	Chaperonin complex component, TCP-1 gamma subunit (CCT3)	O	Posttranslational modification, protein turnover, chaperones	K09495|1|0.0|1077|egu:105047114|T-complex protein 1 subunit gamma	GO:0006457//protein folding	GO:0051082//unfolded protein binding;GO:0005524//ATP binding	GO:0005737//cytoplasm
4268	PB.71200.4|m.190784	type:confident-complete len:173 strand:+ pos:135-653	19851.3	0.384	5	23	PB.70917.3|m.39989;PB.70917.2|m.33395;PB.72575.1|m.33795;PB.70917.1|m.23307;PB.70917.4|m.181673;PB.71200.1|m.25979;PB.70917.5|m.201099;PB.73890.1|m.175562;PB.66848.1|m.25419;PB.66848.6|m.213874;PB.71200.2|m.30116	1.06	1.285|0.953|0.955	0.191	23|22|20	0.007|0.653|0.760	MREMKGQKLVLNISVGESGDRLTRAAKVLEQLSGQTPVFSKARYTVRSFGIRRNEKIACYVTVRGDKAMQLLESGLKVKEYELLRRNFSDTGCFGFGIQEHIDLGIKYDPSTGIYGMDFYVVLERPGYRVGRRCRCKSRVGIQHRVTKDDAMKWFQVKYEGVILNKSQNITG	97.093	1e-120	XP_009351472.1	PREDICTED: 60S ribosomal protein L11 [Pyrus x bretschneideri]	95.35	4e-121	sp|P42795|RL111_ARATH	60S ribosomal protein L11-1 OS=Arabidopsis thaliana GN=RPL11A PE=2 SV=2	At4g18730	339	5e-121	KOG0397	60S ribosomal protein L11	J	Translation, ribosomal structure and biogenesis	K02868|1|2e-121|343|pxb:103943011|large subunit ribosomal protein L11e	GO:0006412//translation	GO:0003735//structural constituent of ribosome	GO:0005840//ribosome
4330	PB.6907.7|m.178610	type:likely-NA len:412 strand:- pos:329-1564	45777.4	0.161	5	5	-	1.19	1.326|1.085|1.151	0.125	5|5|6	0.028|0.792|0.321	MAYGFHNLERRTVVLADGAIRSYFALPPDYPMEPQLGLGPPPGLGQLGPVRRFSPDGFREAPLPPPGRDYGRAAERDYWSSLGLDGPSSSSSLKRKFPHDDSDELALHRQHVLQYGKTSPPPSMKDSRALRLTKPERGGTKDSPASAEVDAQALKRAFLRFSKAINENPTQKKYYLEDGKIAPLQCIVCGRASKEFTDVHNLLLHVYNAKNADLRVDHLGLHKALCVLMGWSYTKEPHNLKAYQSLSVEEASANKEDLIVWPPVVIIHNTNTGRIREGRMEGLGNKDMDLKLKELGFGGGKSKSMYGKEGHLGFTVVKFADSRAGLKDAERLAEYFEKDNHGRKGWARAEASKSSVDDEKNPALVKVDEKSGEKKRIFYAYLATASDIEKLDADMAKKS…	59.101	2e-177	XP_010932757.1	PREDICTED: uncharacterized protein LOC105053352 [Elaeis guineensis]	29.73	2e-12	sp|A5YVF1|SGS3_SOLLC	Protein SUPPRESSOR OF GENE SILENCING 3 OS=Solanum lycopersicum GN=SGS3 PE=1 SV=1	-	-	-	-	-	-	-	-	GO:0031047//gene silencing by RNA	-	-
4338	PB.15031.3|m.152839	type:confident-5partial len:527 strand:+ pos:1-1581	59851.4	0.158	5	8	PB.15031.2|m.92974	1.11	1.444|0.902|0.982	0.293	7|8|7	0.007|0.325|0.949	RNNAIFRVFPFPSLCVFSEFLEAEAMEIPFSFAIVLALLFLSPSSSADEPFDVRRHLSTVTRYAAGKDANLAFYQPTSVPDGCSPIHLDLVARHGTRSPTKKRIKELDRFATRLDGLLNSVKQEARDSSSLQKIPSWLFGWQSPWKGKKKGGELDIKGEEELFNLAIRVREKFPELFDQDYHPDIYTIRATQIPRASASAVAFGIGLFSGKGSLGPGRHRAFSVTSESRASDTCLRFHENCATYKEYRRSQEPAVDTLKEPILDEVSSGLISRYQLNFTRQDVALLWFLCKQEASLLEITDQACGLFSASEVSLLEWSDDLEVFLLKGYGKSINYRMGVALLKDVLESIEQAIMAKEENLPPGTYEKARLRFAHAETVIPFTCLLGLFLEGSEFEQIQN…	72.371	0	XP_008792168.1	PREDICTED: multiple inositol polyphosphate phosphatase 1 isoform X1 [Phoenix dactylifera]	-	-	-	-	At1g09870	622	0	KOG1382	Multiple inositol polyphosphate phosphatase	R	General function prediction only	K03103|1|0.0|739|pda:103708852|multiple inositol-polyphosphate phosphatase / 2,3-bisphosphoglycerate 3-phosphatase [EC:3.1.3.62 3.1.3.80]	-	-	-
4347	PB.39810.9|m.111898	type:confident-complete len:569 strand:+ pos:53-1759	62400.1	0.148	7	8	PB.39810.7|m.103956;PB.39810.3|m.23393;PB.39810.8|m.105216	1.12	1.235|1.057|1.074	0.098	8|6|7	0.028|0.845|0.716	MKTREKDIDDLPKNPANYTALTPLWFLERAALVQPNRLSVVHGDVKYTWSDTYRRCRRLASALSSRSIGPGCTVAVIAPNIPAIYEAHFGVPMSGAVVNTVNIRLNASTVAFLLGHSSAEVVMVDQEFFSLADEALKIMAGKKKGPFKSPLLIVIGDRSCDPGALKNALERGAIEYEDFLETGNPEFAWSPPKDEWQSIALGYTSGTTSSPKGVVLHHRGAYLMSLSGALIWGMNEGAIYLWTLPMFHCNGWCYTWSLAALCGTSICLRQVTAKAIYSAIANHGVTHFCAAPVVLNSIVNAPPNEAILPLPRTVNVNTAGAAPPASVIAAMSNLGFRVTHTYGLSETYGPSTVCTWKPEWDALPPETRARLNARQGVRYIGLEGLDVVDPKTMVPVPSD…	84.48	0	AIY34665.1	4-coumarate:CoA ligase-like protein [Ornithogalum longebracteatum]	73.67	0	sp|Q8VZF1|AEE7_ARATH	Acetate/butyrate--CoA ligase AAE7, peroxisomal OS=Arabidopsis thaliana GN=AAE7 PE=1 SV=1	At3g16910	904	0	KOG1176	Acyl-CoA synthetase	I	Lipid transport and metabolism	K01913|1|0.0|1008|egu:105057401|acetate---CoA ligase [EC:6.2.1.1]	GO:0008152//metabolic process	GO:0003824//catalytic activity	-
4492	PB.1045.1|m.211069	type:confident-complete len:748 strand:+ pos:3033-5276	84540.1	0.28	2	3	PB.520.97|m.155190;PB.520.15|m.18301;PB.553.34|m.190372;PB.520.107|m.162147;PB.520.69|m.145944;PB.520.108|m.163881	1.59	2.933|0.859|0.989	1.162	4|4|4	0.007|0.602|0.976	MRRPDQTKTFKVELSFASKIPMHALASALKGIDSEMSQEALRVLDIILRQNAAKQGCLLVRQSFFQNNPSNFTDLGGGVLGCRGFHSSFRTAQGGLSLNIDVSTTMIVRPGPVADFLVANQNVRDPFQVDWAKAKRTLKNLRVKVTPSNTEYKIVGLSELPCSQQMFTLKQRNRDGNGNSDVQTLEITVYDYFVNHRNIQLKYSGDLPCINVGKPKRPTFFPVELCSLVSLQRYTKALTTLQRSSLVEKSRQKPQERMTTLTNALKCSNYDADPMLRACGVSISTQFTQVDGRVLQPPKLKVGNGEDFQPRNGRWNFNNKKLFEPTQVDKWAVVNFSARCDMRSLVRDLIKCGNLKGISIEEPFVLLDENSNMRRAPPPARVEDMFEQIKSKLPGAPKF…	84.337	0	XP_020274159.1	protein argonaute 4B-like [Asparagus officinalis]	75.77	0	sp|Q0JF58|AGO4B_ORYSJ	Protein argonaute 4B OS=Oryza sativa subsp. japonica GN=AGO4B PE=2 SV=1	At2g27040	1140	0	KOG1041	Translation initiation factor 2C (eIF-2C) and related proteins	J	Translation, ribosomal structure and biogenesis	K11593|1|0.0|1341|aof:109848861|eukaryotic translation initiation factor 2C	GO:0031047//gene silencing by RNA	GO:0003676//nucleic acid binding;GO:0003743//translation initiation factor activity	-
4516	PB.63587.5|m.205279	type:suspicious-NA len:69 strand:+ pos:481-687	7098.9	0.132	1	2	PB.69285.1|m.30228	1.2	1.026|2.125|0.454	0.849	2|2|2	0.984|0.422|0.037	TTLEIHKQIATQQAVVGGSGPSASNVKVSKKKKSSDLKYDVLGWVILAVAVVAWVGMAKSHAPPSPPR	72.308	3e-26	XP_020598319.1	mitochondrial import receptor subunit TOM20-like isoform X1 [Phalaenopsis equestris]	53.03	1e-16	sp|A2WYG9|TOM20_ORYSI	Probable mitochondrial import receptor subunit TOM20 OS=Oryza sativa subsp. indica GN=TOM20 PE=2 SV=2	-	-	-	-	-	-	-	-	GO:0045040//protein import into mitochondrial outer membrane		GO:0005742//mitochondrial outer membrane translocase complex;GO:0016021//integral component of membrane
4525	PB.43150.4|m.87342	type:likely-NA len:412 strand:+ pos:328-1563	44403.7	0.304	4	8	PB.43150.1|m.4795	1.2	1.422|1.087|1.102	0.189	8|8|8	0.022|0.849|0.314	MNALAATSRNFKRAAGLLGLDAKLERSLLIPFREIKVECTIPKDDGSLASFVGFRIQHDNARGPMKGGIRYHPEVDPDEVNALAQLMTWKTAVANIPYGGAKGGIGCSPGDLSISELERLTRVFTQKIHDLIGIHTDVPAPDMGTNPQTMAWILDEYSKFHGYSPAIVTGKPVDLGGSLGRDAATGRGALFATEALLAEYGKSISGQRFVIQGFGNVGSWAAHLISEAGGKVIAVSDVTGAIKNSQGLDIQKLLKHSVDNRGIKGFGGGDEIDANSLLTEDCDILISAALGGVINRENANDIKAKFIIEAANHPTDPEADEILSKKGVLILPDILANSGGVTVSYFEWVQNIQGFMWDEEKVNRELRTYMTNGFKAVKEMCGTHNCDLRMGAFTLGVNR…	91.241	0	XP_020256063.1	glutamate dehydrogenase 1, mitochondrial [Asparagus officinalis]	90.02	0	sp|Q852M0|DHE1_ORYSJ	Glutamate dehydrogenase 1, mitochondrial OS=Oryza sativa subsp. japonica GN=GDH1 PE=2 SV=1	At5g18170	741	0	KOG2250	Glutamate/leucine/phenylalanine/valine dehydrogenases	E	Amino acid transport and metabolism	K00261|1|0.0|784|aof:109832968|glutamate dehydrogenase (NAD(P)+) [EC:1.4.1.3]	GO:1901698//response to nitrogen compound;GO:0006520//cellular amino acid metabolic process;GO:0006995//cellular response to nitrogen starvation	GO:0004353//glutamate dehydrogenase [NAD(P)+] activity	GO:0005739//mitochondrion
4649	PB.69612.4|m.197523	type:confident-5partial len:184 strand:+ pos:2-553	18931.6	0.24	1	4	-	1.13	1.191|0.928|1.284	0.185	7|10|6	0.037|0.844|0.037	PSLAFTLFPSLSFSPLGLGFITFSVMADQVSAGNGGDSKEISFSALKPQLVVPSQKAEAAVAFYKAAFGAEEVKRSVFTKRKADQEQPLLHCAELKIGGSSLLVCDQNDDSSPVIAGAGGIVLCLETDDVVGAVSKAVGAGAAPIEEAAAAEGEGEGEVKVKDPFGVVWLIGKQCCAAADVEA	56.805	2e-43	XP_019434028.1	PREDICTED: uncharacterized protein At5g48480 [Lupinus angustifolius]	40.26	2e-24	sp|Q9LV66|Y5848_ARATH	Uncharacterized protein At5g48480 OS=Arabidopsis thaliana GN=At5g48480 PE=1 SV=1	-	-	-	-	-	-	-	-	-	-	-
4736	PB.40111.5|m.182816	type:confident-5partial len:55 strand:+ pos:1-165	6205.06	0.389	1	6	PB.43090.11|m.87439;PB.43090.20|m.187327;PB.43090.23|m.189110;PB.73312.1|m.182911;PB.43090.31|m.195854;PB.43090.15|m.184386;PB.43090.12|m.174746;PB.65295.1|m.208437;PB.43090.13|m.177750;PB.43090.6|m.37560;PB.43090.50|m.207259;PB.43090.38|m.200893;PB.60010.4|m.186897;PB.72550.1|m.196760;PB.43090.32|m.197475;PB.43090.16|m.180277;PB.71541.1|m.189008;PB.43090.26|m.191099;PB.43090.47|m.204450;PB.52136…	1.11	1.636|0.754|0.953	0.463	5|6|6	0.022|0.793|0.924	IKHKIEEEIAAAAAVGSGGYAFHEKHERKESREEEEGEYWRKEASLFLVSSYKD	67.391	8e-12	AHJ09608.1	abscisic stress-ripening protein ASR [Camellia sinensis]	76.92	5e-07	sp|P37219|ASR2_SOLLC	Abscisic stress-ripening protein 2 OS=Solanum lycopersicum GN=ASR2 PE=4 SV=1	-	-	-	-	-	-	-	-	-	-	-
4838	PB.42723.2|m.17343	type:confident-5partial len:420 strand:+ pos:1-1260	46335.5	0.2	3	3	PB.42723.1|m.2794	1.14	1.623|0.926|0.861	0.422	3|3|3	0.015|0.951|0.600	SGIDGAGALSGIKRSAEALYNQTILGSHNSIGQSEGLFSTNSMFKFPRLESGSNLLIYPQHPGEKDCAHYMLTRTCKFGESCKFDHPIWVPAGGIPDWKEVPLAATTEPLPERPGEPDCPYFMKTQNCKFGFRCKFNHPKDKLNEGLEFADPSLLPERPSEPICSFYAKTGNCKFGATCKFHHPKDLQIPLSGQDTGSIEQREIAFQNNGLAGDSMAAKAFVPFTPALLHNSKGLPIRPGETDCPFYLKTGSCKYGATCRYNHPDMIVSGGTVVPSASSFPTGLFNQVSNYIPSLDPLFAQASLGITQTVYPQRPGELECDFYMKNGHCKFGERCRFHHPLDRTAPTALVAKQAQPGVKLTPAGLPRREGLVACPFYMKTGTCKYGVTCRFDHPPPGEA…	72.917	0	XP_020265075.1	zinc finger CCCH domain-containing protein 8 [Asparagus officinalis]	56.38	2e-173	sp|Q941Q3|C3H37_ARATH	Zinc finger CCCH domain-containing protein 37 OS=Arabidopsis thaliana GN=HUA1 PE=1 SV=1	At3g12680	373	4e-128	KOG1677	CCCH-type Zn-finger protein	R	General function prediction only	K13832|1|2e-28|122|boe:106335320|3-dehydroquinate dehydratase / shikimate dehydrogenase [EC:4.2.1.10 1.1.1.25]		GO:0046872//metal ion binding	-
4874	PB.7658.5|m.128490	type:suspicious-NA len:545 strand:+ pos:135-1769	58437.9	0.3	1	1	-	1.11	1.327|0.970|1.041	0.189	15|18|13	0.007|0.935|0.462	MAGDRSNYGKRSHSQGDYSDNGGSKRRNPGDDKDTYTPGPEDTVYRYLCPGRKIGSIIGRGGDIVKQLRADTQAKIRIGETVPGCEERVISIFSTGDETNSLDDYGEVCPAQDALFKVHERLISDEPMDEDTDEGAPQVTVRLLVPSDQIGCIIGKGGQIVQGIRSDTGAQIRILKNEHLPACAISSDELLQITGEAPVVKKALFKVSSQLHDNPSRSQHLLISSVPNTYPPSGGYGSRSSGAPVVGMGPLMGSYGGYKSEAAGDWPSFYPPSRNEASAKDFSLRLICSSLNIGGVIGRGGGIIKQIRQESGAYIKADSSSGEDDCIITISAKEYFEDPVSPTIDAAVRLQPRCSEKTERESGEASFTTRLLVPTSRIGCLIGKGGTIIAEMRRSTRAN…	81.204	0	XP_010922375.1	PREDICTED: KH domain-containing protein At4g18375 [Elaeis guineensis]	29.97	5e-61	sp|P58223|Y4837_ARATH	KH domain-containing protein At4g18375 OS=Arabidopsis thaliana GN=At4g18375 PE=2 SV=1	At5g15270	578	0	KOG2190	PolyC-binding proteins alphaCP-1 and related KH domain proteins	AR	RNA processing and modification;General function prediction only	K21444|1|0.0|867|egu:105045705|poly(rC)-binding protein 3/4	-	-	-
4896	PB.6040.1|m.181396	type:confident-complete len:323 strand:+ pos:86-1054	35727.7	0.252	6	9	PB.27953.16|m.34108;PB.27953.8|m.11871;PB.27953.25|m.58614;PB.27953.12|m.19124;PB.27953.9|m.17018;PB.27953.36|m.95039;PB.27953.24|m.53412;PB.34330.11|m.82527;PB.34330.13|m.101838;PB.27953.5|m.8608;PB.34330.14|m.112945;PB.34330.12|m.101646;PB.34330.16|m.116681;PB.34330.2|m.16139	1.07	1.394|0.884|0.928	0.283	9|9|9	0.007|0.755|0.653	MLVLFETPAGFALFKVLDEGKLSKVEDLFEEFSTTESARKLVKLKAFSKFDNTSEALSSATLLIDGKPSKGLRKFLREHCDGETLAVGDSKLGNAINEKLKIDCLHTNAVMELMRGLRSQLTELISGLAVQDLAPMSLGLSHSLSRYKLKFSPDKVDTMIIQAIGLLDDLDKELNTYAMRVREWYGWHFPELAKIVQDNIQYAKAVKIMGDRVNAVDLDFSEVLSQEVEAELKEAAVISMGTEVSELDLINIKELCDQVLALSEYRAQLYDYLKSRMNTIAPNLTALVGELVGARLIAHGGSLLNLAKQPSSTVQILGAEKV	90.683	0	XP_008796213.1	PREDICTED: probable nucleolar protein 5-2 isoform X2 [Phoenix dactylifera]	81.93	0	sp|O04658|NOP5A_ARATH	Probable nucleolar protein 5-1 OS=Arabidopsis thaliana GN=NOP5-1 PE=1 SV=2	At5g27120	546	0	KOG2572	Ribosome biogenesis protein - Nop58p/Nop5p	AJ	RNA processing and modification;Translation, ribosomal structure and biogenesis	K14565|1|0.0|609|pda:103711731|nucleolar protein 58	-	-	-
4930	PB.48245.3|m.53775	type:confident-5partial len:330 strand:+ pos:1-990	37004.4	0.334	9	12	PB.48245.2|m.8978	1.09	1.262|0.978|1.037	0.15	12|11|12	0.025|0.977|0.785	ELLAPPTKGGGGGAGDGFDVTKSGDSRVGLVGFPSVGKSTLLNKLTGTFSEVASYEFTTLTCIPGVITYRGAKIQLLDLPGIIEGAKDGKGRGRQVISTARTCNCILIVLDAIKPITHKRLIEKELEGFGIRLNKEPPNLTFRRKDKGGINFTSTVTNTNLDLETVKAICGEYRIHNADVSLRYDATADDLIDIIEGSRVYIPCIYVVNKIDQITLEELEILDKLPHYCPVSAHLEWNLDGLLDKIWEYLDLTRIYTKPKGMNPDYEDPVILSSKKRTVEDFCSRIHKDMLKQFKYALVWGSSVKHKPQRVGKEHELEDEDVVQIIKKV	95.745	0	XP_002279867.1	PREDICTED: developmentally-regulated G-protein 3 isoform X2 [Vitis vinifera]	93.31	0	sp|Q9SVA6|DRG3_ARATH	Developmentally-regulated G-protein 3 OS=Arabidopsis thaliana GN=DRG3 PE=1 SV=1	At4g39520	622	0	KOG1487	GTP-binding protein DRG1 (ODN superfamily)	T	Signal transduction mechanisms	K06944|1|0.0|625|aly:ARALYDRAFT_912415|uncharacterized protein		GO:0005525//GTP binding	-
5070	PB.71181.4|m.196745	type:confident-5partial len:193 strand:+ pos:2-580	19431	0.344	1	6	-	1.73	1.381|1.871|1.924	0.299	6|6|6	0.025|0.672|0.341	WVLSIESGFSSPLLSLPRFFSRYFLFLPPMADAEYRCFVGGIAWAIDDQSLEKSFSTFSKIIESKNINERETGRSCGFGFVIFSNEQSMRDAIEGMNGQNLDGRNITVNEAQSRGSGGGGGSRGGGGGGYGGGGGGYGGGGGGGRREGGYGGGGGGGYGGGGRDRGYGGGSEGGGGYGGGSRYSRGGGESGW	81.707	1e-40	XP_003631658.1	PREDICTED: glycine-rich RNA-binding protein GRP2A [Vitis vinifera]	75	1e-39	sp|Q03878|GRP1_DAUCA	Glycine-rich RNA-binding protein OS=Daucus carota PE=2 SV=1	At2g21660	125	3e-36	KOG0118	FOG: RRM domain	R	General function prediction only	K13195|1|3e-38|132|gmx:100305467|cold-inducible RNA-binding protein		GO:0003723//RNA binding	-
5093	PB.68309.2|m.190191	type:confident-complete len:184 strand:+ pos:292-843	19818.9	0.202	3	5	PB.68309.1|m.37735	1.27	1.583|1.115|1.124	0.268	5|5|4	0.022|0.762|0.574	MDSDDYDDEQQQQHNSHSRHNPTTTTTPPLRRAFFSSAKVVAEAAQSTFRHDAKGYDKAKAADAAADLLSAASRYGKLEESGYGNYIEKAENYLHHFNHADSTTSAHSKPPTNSEEEEGGGYMGHSTGNSHSHGKEDGGDGMGDYMKMAQGFMAHSKTGHGEEEGGGGYGEYVKMAEGFLKKH	44.937	3e-29	XP_010936368.1	PREDICTED: nodulin-related protein 1 [Elaeis guineensis]	44	3e-22	sp|Q9ZQ80|NDRP1_ARATH	Nodulin-related protein 1 OS=Arabidopsis thaliana GN=NRP1 PE=1 SV=1	-	-	-	-	-	-	-	-	-	-	-
5098	PB.229.41|m.137985	type:suspicious-NA len:450 strand:+ pos:3-1352	51000.7	0.403	1	1	-	1.8	2.920|1.015|1.468	0.995	18|17|18	0.007|0.989|0.273	AHTNELVALFSRLVKQGKGMLQPHQLFAEYEAAIPENERQKLKDGAFEDVLRAAQEAIIMPPWVALAIRPRPGVWEYVRVNVNELAVEELSVPEYLKFKEELVNGSANENFVLELDFEPFNAHVPRPSLSKSIGNGVQFLNRHLSAKLFHDKESMYPLLNFLREHHYKGTTMMLNDRLRSLSALQSALRKAEKYLLTIPQDTPYSDFNHRFQEIGLEKGWGDTAQRVHETIHLLLDLLEAPDPCTLETFLSTIPMVFNVVILSPHGYFAQANVLGYPDTGGQVVYILDQVRALESEMLLRIKHQGLDITPKILIVTRLLPDAVGTTCGQRLEKVLGTEHTSILRVPFRTENGILRKWISRFEVWPYLETYTEDVANELAAELQATPDLIIGNYSDGNLV…	89.376	0	AMN16535.1	sucrose synthase [Ornithogalum longebracteatum]	86.14	0	sp|Q41607|SUS2_TULGE	Sucrose synthase 2 OS=Tulipa gesneriana PE=2 SV=1	At3g43190	677	0	KOG0853	Glycosyltransferase	M	Cell wall/membrane/envelope biogenesis	K00695|1|0.0|806|aof:109845351|sucrose synthase [EC:2.4.1.13]	GO:0005985//sucrose metabolic process	GO:0016157//sucrose synthase activity	-
5115	PB.65157.2|m.42697	type:suspicious-NA len:206 strand:+ pos:59-676	22368.2	0.195	2	3	PB.65157.4|m.59786	1.31	1.639|1.185|1.106	0.288	3|3|3	0.018|0.732|0.915	MATTGVDVEAVDFEMDDDDLMDEEGASADADASIAPAPKLRSAITGGDASAAAGRLPKKTKGRGFREEAASADRTSRLAAKDFDSLDSGGGPGPQRSIEGWIVLVTGVHEEAQEDDLHNAFREYGQLKNLHLNLDRRTGFVKGYALIEYESYSEAHAAISALNGTELLTQIIYVDWAFSNGPFKRRNARRSPRALRSRSPPRRRY	73	5e-98	XP_010269705.1	PREDICTED: RNA-binding protein 8A-B [Nelumbo nucifera]	59.38	3e-75	sp|F4I9J7|Y14_ARATH	RNA-binding protein Y14 OS=Arabidopsis thaliana GN=Y14 PE=1 SV=1	At1g51510	225	3e-75	KOG0130	RNA-binding protein RBM8/Tsunagi (RRM superfamily)	R	General function prediction only	K12876|1|8e-99|288|nnu:104606290|RNA-binding protein 8A	GO:0006396//RNA processing	GO:0003729//mRNA binding	GO:0005737//cytoplasm;GO:0005634//nucleus
5158	PB.74530.1|m.15978	type:confident-5partial len:51 strand:+ pos:3-155	5297.73	0.54	2	3	PB.74530.3|m.176472;PB.18226.1|m.115730;PB.18226.3|m.144536;PB.74530.2|m.23492	2.46	3.653|1.330|2.390	1.163	3|3|3	0.015|0.577|0.087	PDRRTTCTCLKQAAAGVSGQNVALASGLPGKCGVKIPYKISPSTDCAKVK	76	3e-20	OVA00038.1	Plant lipid transfer protein/Par allergen [Macleaya cordata]	70	1e-19	sp|Q43129|NLTP2_GOSHI	Non-specific lipid-transfer protein OS=Gossypium hirsutum PE=2 SV=1	-	-	-	-	-	-	-	-	GO:0010143//cutin biosynthetic process;GO:0090379//secondary cell wall biogenesis involved in seed trichome differentiation;GO:0006869//lipid transport	GO:0008289//lipid binding	-
5281	PB.30452.8|m.43572	type:confident-5partial len:326 strand:+ pos:2-979	35287.2	0.471	3	6	PB.30452.11|m.83684;PB.30452.1|m.3114;PB.30452.9|m.58000;PB.30452.10|m.61970;PB.30452.12|m.89365	1.22	1.557|1.033|1.067	0.293	4|4|6	0.015|0.959|0.941	GRANIGAAKLGLEKRGFALPSYSDSSKVAYVLQGSGTCGIVLPEATKEKVLAIKTGDTLALPFGVLTWWFNPEDTELVVLFLGDTSKGHKPGEFTNFQITGTNGIFTGFSTEFVGRAWDLSEDQAKQLVTTQTGCCIVKVKDGLKMPEPSPKAREGMVLNCLEAPLDVDIKGGGRVVVLNTKNLPLVGEVGLGADLVRIDGFSMCSPGFSCDSAFQVTYIVRGSGRVQVVGIDGKRVLETHIKAGNLFIVPRFFVVSKIADADGMEWFSIITTPNPIFSHLAGKTSVWKALSPEVLVASFDTTPDLEQSFRSKRTSDEIFFAPPK	83.025	0	XP_020274571.1	legumin B-like [Asparagus officinalis]	27.56	5e-39	sp|Q6K508|GLUD1_ORYSJ	Glutelin type-D 1 OS=Oryza sativa subsp. japonica GN=GLUD1 PE=2 SV=1	-	-	-	-	-	-	-	K01569|1|7e-48|168|smo:SELMODRAFT_83729|oxalate decarboxylase [EC:4.1.1.2]		GO:0045735//nutrient reservoir activity	-
5294	PB.74195.3|m.179624	type:confident-5partial len:138 strand:+ pos:2-415	15719.5	0.299	4	8	PB.74195.2|m.179572;PB.74683.1|m.178888;PB.74195.1|m.177031	1.06	1.270|0.924|0.991	0.184	8|8|7	0.028|0.942|0.976	GFSREKEGIWATAATMVEKRSSKGRKEEVVTREYTINLHRRLHGCTFKKMAPTAIKEIRKFAKKAMGTTDVRVDVKLNKHIWSRGIRSVPRRVRVRIARKRNEEEDAKEELYSLVTVAEIPAEGLRGLGTKVIDEAD	90.164	2e-73	XP_006850140.1	60S ribosomal protein L31 [Amborella trichopoda]	87.07	5e-71	sp|Q9M573|RL31_PERFR	60S ribosomal protein L31 OS=Perilla frutescens GN=RPL31 PE=2 SV=1	At5g56710	199	7e-67	KOG0893	60S ribosomal protein L31	J	Translation, ribosomal structure and biogenesis	K02910|1|3e-74|220|atr:18439922|large subunit ribosomal protein L31e	GO:0006412//translation	GO:0003735//structural constituent of ribosome	GO:0005840//ribosome
5371	PB.42410.2|m.2216	type:confident-complete len:506 strand:+ pos:88-1605	55589.6	0.115	2	5	-	1.11	1.319|1.045|0.961	0.187	7|9|9	0.026|0.953|0.935	MGKPKKIKGKAKFGEGAKSAAAKPAAAALKVSTSNSTPSSIKKKIKKKENMIKMKNEIPETEIDVAKEANAPSEAPAKAEKSSGFIFMCNSRTKPECYRHQVFGVPRGKAELVERIKPGARLFLYDIDLKLLYGIYRAVAAGGINLVPEAFGGAFPAQVKFKIDKDCIPLPERSFKQAILENYDAKNRFQQNLGSKQVHKLVLLFQPASKAPPPQAAPLQYTENRHPSARLPPPAEPYRSLPPLLMRPPEDPYRSRGHLASAHMPPPEHQYKSAGQVAASHLPLPEDPYRPAGHIVHPRPPAEDPYRSVGDVVASYLHPAVAYRSGRYLMQQHQLPPEDPYRHAYLPRVPIDSRYLSPFAPPPANDPHAPQHLLAVPTAPPPTDPYYPAPASDPYGQLE…	43.633	7e-97	XP_020245244.1	uncharacterized protein LOC109823380 [Asparagus officinalis]	37.69	3e-17	sp|P37707|B2_DAUCA	B2 protein OS=Daucus carota PE=2 SV=1	-	-	-	-	-	-	-	K20100|1|2e-38|153|sind:105170420|YTH domain-containing protein 1!K03006|2|2e-38|153|sot:102597223|DNA-directed RNA polymerase II subunit RPB1 [EC:2.7.7.6]!K22030|4|1e-35|143|han:110922856|leiomodin!K10443|5|2e-17|90.5|thj:104816526|kelch-like protein 2/3	-	-	-
5386	PB.44899.8|m.88961	type:suspicious-NA len:189 strand:+ pos:261-827	21578.9	0.176	1	2	-	1.27	1.392|1.532|0.889	0.338	4|6|5	0.040|0.430|0.760	MCTRARHTRCRPQLREADNPHRACGRTSIPPIRVPHFQRFMRLLVHSGFFTVTTNEANGEDVYALTTNSVPLISERGHCIIPFIDLMLDESLMFPWQSLSTWFKSEEPSTAFELAHKKFIWEATGTMPDFGRKIREGLGSDSAAIAKVITRTAGLIPRCQDSGGGGRRNRDHRVSNRGRLPRTEVHRV	62.308	1e-49	XP_020247520.1	trans-resveratrol di-O-methyltransferase-like isoform X1 [Asparagus officinalis]	35.82	1e-18	sp|Q93WU2|EOMT1_OCIBA	Eugenol O-methyltransferase OS=Ocimum basilicum GN=EOMT1 PE=1 SV=1	-	-	-	-	-	-	-	K16040|1|5e-24|100|egu:105044075|trans-resveratrol di-O-methyltransferase [EC:2.1.1.240]!K22588|5|1e-19|89.0|fve:101308058|acetylserotonin O-methyltransferase, plant [EC:2.1.1.4]	-	-	-
5454	PB.65143.1|m.44717	type:confident-complete len:285 strand:+ pos:62-916	31633.4	0.211	5	8	-	1.35	1.888|0.960|1.194	0.483	7|7|8	0.007|0.935|0.254	MERVSASVGPRLYEDFVPPSDWIRDEGYDMLIMELPGFKKQNLKVQLDNIGNLRIVGECHIDGNRWRRFRKEFPLPDKCNTSEIRAKFESDMLTVTLPKLITKAEPASKTPTSLAEPAKTPTLPTRAEPAKTPTLPTRDEPAKTPTLPTRAEPVTPTPARAEPPKPLPTQSEPFQTALTSPTRVPETQTTTEKADSGKQANGKDNNKEYGASGKVEEDKMEGKREEKAKYGLGGRAFRMKTKRNQLVVNVAVAVILLLAVGYYVSYKFGKVAEAETNEGLNFEL	70.652	2e-41	XP_020255102.1	inactive protein RESTRICTED TEV MOVEMENT 2-like [Asparagus officinalis]	35.23	1e-12	sp|Q9M670|RTM2_ARATH	Protein RESTRICTED TEV MOVEMENT 2 OS=Arabidopsis thaliana GN=RTM2 PE=1 SV=1	At2g27140	99.4	2e-24	KOG0710	Molecular chaperone (small heat-shock protein Hsp26/Hsp42)	O	Posttranslational modification, protein turnover, chaperones	K13993|1|9e-16|79.0|crb:17881713|HSP20 family protein	-	-	-
5490	PB.56711.2|m.61828	type:confident-complete len:348 strand:+ pos:3-1046	38980.8	0.354	10	20	-	1.1	1.025|1.219|1.043	0.107	19|16|19	0.850|0.030|0.656	MASLQLSLLVVPLLMVSSLLHQSSSQYISFRGVEAEGENFLNSPQVSSCPVPDPALYYRPVIGILSHPGDGASGRLKNGSGVTNIPSSYVKFVESAGARVIPLIHTEPWENIQEKLSLVNGVLFTGGWAKEGLYFETAEKIFQIVLDKNDAGEQFPLFAICLGFEILSMIVSKDRDICEKFSAENHASTLKFTNIADIQGSLFQRFPPELLRKLSTECLAMQNHQFGLSPKRLQENDLLSSFFKILTTTVDENNQVYVSTAKAHKYPVTGFQWHPEKNAFEWGSKEIPHSEDAIQVTQYVANYFISEARKSSNRPAERKVLDNLIYNYSPTYCGKAGKGYDEVYIFA	76.238	2e-178	XP_020105946.1	gamma-glutamyl hydrolase 2-like [Ananas comosus]	68.56	4e-158	sp|O65355|GGH2_ARATH	Gamma-glutamyl hydrolase 2 OS=Arabidopsis thaliana GN=GGH2 PE=1 SV=2	At1g78680	446	8e-158	KOG1559	Gamma-glutamyl hydrolase	H	Coenzyme transport and metabolism	K01307|1|3e-178|503|pda:103708964|gamma-glutamyl hydrolase [EC:3.4.19.9]	-	-	-
5548	PB.36411.3|m.106641	type:confident-complete len:594 strand:+ pos:63-1844	62776.2	0.337	4	10	PB.39545.1|m.11972;PB.39545.2|m.110587	1.05	1.221|0.879|1.061	0.171	10|10|10	0.007|0.233|0.725	MSASTATTNLLSSRSLQNPNNGRLLLRRAVCLPIHRNRRLSVSAVQNSAAKPTILVAEKLGEAGLDLLKSFANVDCSYDLTQEELCTKISLCDALIVRSGTKVGREVFESSAGRLKVVGRAGVGIDNVDLSAATEHGCLVVNAPTANTVAAAEHAIALMAAMARNVAQADASLKAGKWQRSKYVGVSLVGKTLAVMGFGKVGSEVARRAKGLGMHVIAHDPYAAADRARAIGVELVGFEVAITTADFISLHMPLTPSTSKILNDESFAKMKKGVRIINVARGGVIDEEALVRALDSGIVAQAALDVFTKEPPSPDSALVLHENVTVTPHLGASTMEAQEGVAIEIAEAVVGALKGELASTAVNAPMVPPEVLLELAPFVVLAEKLGRLAVQLVAGGSGV…	85.93	0	XP_010927510.1	PREDICTED: D-3-phosphoglycerate dehydrogenase 3, chloroplastic-like [Elaeis guineensis]	80.82	0	sp|O49485|SERA1_ARATH	D-3-phosphoglycerate dehydrogenase 1, chloroplastic OS=Arabidopsis thaliana GN=PGDH1 PE=1 SV=1	At4g34200	949	0	KOG0068	D-3-phosphoglycerate dehydrogenase, D-isomer-specific 2-hydroxy acid dehydrogenase superfamily	E	Amino acid transport and metabolism	K00058|1|0.0|1019|egu:105049537|D-3-phosphoglycerate dehydrogenase / 2-oxoglutarate reductase [EC:1.1.1.95 1.1.1.399]	GO:0006564//L-serine biosynthetic process	GO:0051287//NAD binding;GO:0004617//phosphoglycerate dehydrogenase activity	-
Note：# Identified unique peptide number of protein ，*Identified unique spectrum number of protein，★Spectrum number of flower/non-flower,▲ Statistical test Qvalue of flower/non-flower

## Sheet: flower-VS-nonflower_down
Table S4. List of DAPs detailed annotation in present work.
No.	Protein ID	Description	Mass	Protein Coverage	Uniq Pep Num#	Uniq Spec Num*	Sameset	Mean Ratio flower-VS-non-flower	Ratio flower-VS-non-flower	SD flower-VS-non-flower	Quant Num flower-VS-non-flower★	Qvalue flower-VS-non-flower▲	Protein Sequence	NCBInr Identity	NCBInr E-value	NCBInr Accession	NCBInr Description	Swissprot Identity	Swissprot E-value	Swissprot Accession	Swissprot Description	Protein or Domain	KOG Score	KOG E-value	KOG ID	KOG Function-Description	KOG Code	KOG Function-Categories	KEGG(ko id|rank|evalue|score|subject id|ko definition)	GO Biological Process	GO Molecular Function	GO Cellular Component
34	PB.39155.5|m.9557	type:confident-complete len:511 strand:+ pos:41-1573	57000	0.38	3	9	-	0.91	0.824|0.882|1.023	0.102	42|42|43	0.007|0.124|0.888	MAISSNSRVRFWICSIFVTLLVFSSSPYPVRADDGDAKEESVLTLDASNFDEAIKKHPFIVVEFYAPWCGHCKKLAPEYEKAAVVLSKNDPPITLAKVDASEDANKELASRFDVKGFPTIKIVRNEGKNIQEFKGPRDAEGIIEYLKKQVGPASVEIKSSEQAESLIGDKKIFIVGLFPEFSGEEFENFTELAEKLRSDYDFGHTSDAKFLPRGDAAAKGPVVRLFKPFDELVVDSQEFYPDALETFVDVASVPLVTIFNKDPLNHPFVTKFFDAPNAKAMLFLNFSSEYFDALKSKYYEVASEYKGKISFLIGDVDASQGAFQYFGLKEDQVPLIVLQESDGTKFLKPNLVSAQVATWFKEYTDGNLKPFRKSEPIPEVNSEPVKVVVADNLHDVVYK…	73.031	0	XP_020253105.1	protein disulfide-isomerase-like [Asparagus officinalis]	64.63	0	sp|Q43116|PDI_RICCO	Protein disulfide-isomerase OS=Ricinus communis PE=2 SV=1	At1g77510	611	0	KOG0190	Protein disulfide isomerase (prolyl 4-hydroxylase beta subunit)	O	Posttranslational modification, protein turnover, chaperones	K09580|1|0.0|764|aof:109830293|protein disulfide-isomerase A1 [EC:5.3.4.1]	GO:0045454//cell redox homeostasis;GO:0034976//response to endoplasmic reticulum stress;GO:0006457//protein folding	GO:0003756//protein disulfide isomerase activity	GO:0005783//endoplasmic reticulum
215	PB.16241.1|m.154806	type:suspicious-NA len:191 strand:+ pos:801-1373	22108.9	0.063	1	4	PB.8560.1|m.164666;PB.34932.2|m.63654;PB.34932.6|m.120257;PB.34932.1|m.17976;PB.34932.4|m.116383;PB.34932.3|m.110700;PB.34932.5|m.118296	0.57	0.290|0.528|0.887	0.301	4|3|4	0.040|0.288|0.530	RKRTLTGAEVFDITFVEESQNYLSELPECCSDSKFRNNETDLQTGNKKTILGSRVRLKIRDSGEYETEFANGKRLHKPTRRFIEEISGYPGQKSRCSSERLENTVSSSKAKSLCVRKSRVSLQKKNLPCQNYLQKNLVFSEQSPKEEPNLSELSCSIHYYPGAASSACSERSSQQKCPPPTNSDYETHWR	-	-	-	-	-	-	-	-	-	-	-	-	-	-	-	-	-	-	-
240	PB.8416.3|m.20381	type:confident-5partial len:606 strand:+ pos:2-1819	63950.9	0.469	2	7	-	0.87	0.804|0.803|0.994	0.11	7|7|6	0.018|0.546|0.976	TFPSDFRSPLHREEINPNSSAKMAAANAISTASILCSTRQGSSSRRVMGPGRASFRRMTVRAAAKDVAFDQKSRAALQAGADKLADAVGVTLGPRGRNVVLDEFGNPKVVNDGVTIARAIELSDPMENAGAALIREVASKTNDSAGDGTTTASVLAREIIKLGLLNVTSGANPVSIKKGIDKTVQGLVAELERKARPVKGRGDIRAVATISAGNDEFIGDMIADAIDKVGPDGVLSIESSSSFETTVDVEEGMEIDRGYVSPQFVTNPEKLLVEFENAKVLVTDQKISTIKEIIPLLEKTTQLRAPLLIVAEDVTGEALATLVVNKLRGILNVAAIKAPGFGERRKALLQDIAIMTGAEFQAKDLGLLIENTTVEQLGTARKVTISQSSTTIIADAATK…	87.755	0	XP_009384573.1	PREDICTED: ruBisCO large subunit-binding protein subunit alpha [Musa acuminata subsp. malaccensis]	84.56	0	sp|P08926|RUBA_PEA	RuBisCO large subunit-binding protein subunit alpha, chloroplastic OS=Pisum sativum PE=1 SV=2	At2g28000	917	0	KOG0356	Mitochondrial chaperonin, Cpn60/Hsp60p	O	Posttranslational modification, protein turnover, chaperones	K04077|1|0.0|588|ccp:CHC_T00010148001|chaperonin GroEL	GO:0006458//'de novo' protein folding;GO:0009658//chloroplast organization;GO:0009793//embryo development ending in seed dormancy;GO:0042026//protein refolding;GO:0007005//mitochondrion organization;GO:0061077//chaperone-mediated protein folding	GO:0044183//protein binding involved in protein folding;GO:0051082//unfolded protein binding;GO:0005524//ATP binding	GO:0005737//cytoplasm;GO:0009579//thylakoid;GO:0048046//apoplast;GO:0016020//membrane;GO:0022626//cytosolic ribosome;GO:0009941//chloroplast envelope;GO:0009570//chloroplast stroma;GO:0005829//cytosol;GO:0005739//mitochondrion;GO:0009507//chloroplast
260	PB.59531.1|m.15756	type:confident-5partial len:320 strand:+ pos:2-961	34425	0.232	3	3	PB.59531.3|m.57568	0.77	0.653|0.700|0.944	0.156	3|3|3	0.028|0.179|0.891	DAITPSMATLPLIHVTFLSTTLHSKSFSFPTPSNFTNKPSFFSHFPPEFARKLQRKSGALSATAMADGPISTVLVTGAGGRTGQIVYRKLKEKADQFVARGLVRTVESKEKIGGEDDLFVGNISDAESIVPAVQGIDALIILTSAVPKMKPGFDPSKGERPEFYFEDGAFPEQVDWIGQKNQIDAAKAVGVKQIVLVGSMGGTDLSNPLNSLGNGNILVWKRKAEQYLADSGIPYTIIRAGGLQDKDGGIRELLVGKDDELLQTQTRTIARADVAEVCIQALQIEEAKFKAFDLASKPEGEGTPTTDFKALFSKITARF	78.041	2e-168	XP_009404595.1	PREDICTED: uncharacterized protein At5g02240 [Musa acuminata subsp. malaccensis]	79.2	3e-159	sp|O80934|Y2766_ARATH	Uncharacterized protein At2g37660, chloroplastic OS=Arabidopsis thaliana GN=At2g37660 PE=1 SV=2	At2g37660	439	2e-155	KOG1203	Predicted dehydrogenase	G	Carbohydrate transport and metabolism	K08956|1|2e-142|440|gra:105797721|AFG3 family protein [EC:3.4.24.-]!K01256|2|9e-08|58.2|smo:SELMODRAFT_407075|aminopeptidase N [EC:3.4.11.2]	-	-	-
334	PB.52582.1|m.9752	type:confident-5partial len:365 strand:+ pos:3-1097	40144.7	0.352	6	8	-	0.89	0.817|0.884|0.977	0.08	11|11|11	0.018|0.717|0.840	SLTSSFLRTTEREREREREREAMGVDYYKILQVENSAKDDDLKKAYRKLAMKWHPDKNPENKKEAEAKFKQISEAYEVLSDPQKRAIYDQYGEEGLKGQVPPPAAGGGGTSFFSGGGEGPTVFRFNPRDADDIFAEFFGGGGGMRGGRGGFSGGIFGDDIFGGSAFGGGREGMMGNGMGMGRQQKETAIEKRLPCTLEELYKGTTKKMKISREIADVSGKTLPVEEILTIEIKPGWKKGTKITFPEKGNERPNVTPADIVFVIDEKPHPVFTRDGNDLIATQKISLVEALTGYTVHLTTLDGRKLTIPINSVINPQYEEVVPREGMPIPKDPSRKGNLKIKFSIKFPTRLTSEQKAGIKKLLGS	79.037	0	XP_009392429.1	PREDICTED: dnaJ homolog subfamily B member 4-like isoform X1 [Musa acuminata subsp. malaccensis]	34.77	2e-47	sp|Q9LZK5|DNJ19_ARATH	DnaJ protein ERDJ3B OS=Arabidopsis thaliana GN=ERDJ3B PE=1 SV=1	At2g20560	495	7e-177	KOG0714	Molecular chaperone (DnaJ superfamily)	O	Posttranslational modification, protein turnover, chaperones	K09510|1|0.0|546|mus:103978378|DnaJ homolog subfamily B member 4	GO:0006457//protein folding	GO:0051082//unfolded protein binding	-
380	PB.1878.6|m.104960	type:confident-5partial len:615 strand:+ pos:2-1846	67450.2	0.378	18	40	PB.1878.1|m.2191	0.88	0.817|0.890|0.932	0.058	40|40|35	0.007|0.185|0.037	PSSSSSTSAMASSVSELGAFSPRWPQFLPHNKLKLLSSRRTSHFPVKASSAPSAATQFKINSIRTKPVEGQKTGTSGLRKKVKVFQEENYLANWIQALFNSLPPEDFKNGVLVLGGDGRYFNKEASQIIIKIAAGNGVGKILVGRDGIMSTPAVSAVIRKRKANGGFIMSASHNPGGPEYDWGIKFNYNSGQPAPESITDKIYGNTLSIKEIKAADIPDIDLSCLGVTNYGNFSVEVVDPVSDYLELMEEVFDFQLIKDLLSRSDFRFTFDAMHAVTGAYAKPIFADRLGANLDCIKNGVPLEDFGHGHPDPNLTYAKDLVDIMYAKDAPDLGAASDGDGDRNMILGRQFFITPSDSVAIIAANAQTAIPYFQNGPKGLARSMPTSGALDRVAEKLNLP…	87.77	0	XP_011030017.1	PREDICTED: phosphoglucomutase, chloroplastic-like [Populus euphratica]	85.79	0	sp|Q9SCY0|PGMP_ARATH	Phosphoglucomutase, chloroplastic OS=Arabidopsis thaliana GN=PGMP PE=1 SV=2	At5g51820	1006	0	KOG0625	Phosphoglucomutase	G	Carbohydrate transport and metabolism	K01835|1|0.0|1042|pop:7482159|phosphoglucomutase [EC:5.4.2.2]	GO:0005975//carbohydrate metabolic process	GO:0000287//magnesium ion binding;GO:0016868//intramolecular transferase activity, phosphotransferases	-
486	PB.61420.2|m.38375	type:confident-5partial len:287 strand:+ pos:3-863	31164.7	0.367	1	1	-	0.85	0.818|0.914|0.805	0.06	9|10|9	0.047|0.889|0.033	ELYLMNDGISEEAAKALAELIPSTEMIKILHFHNNMTGDEGAIAIAEILKQSPLLEDFRCSSTRVASDGGIALAGALESCSCLKKLDLRDNIFGLEAGIRLSTSLEKLSGITELYLSYLNLEDEGTIAISDALEKFLPDLEVLEMAGNEITVEAASSLASCVASKQSLRKLVLSENELKDEGTILIAKALEEGHNKLEEVDFSNNMIRRVGARSLARAVASNKPDFVMLNINGNEISDEGIDEVKDILKEGVLGPLDENDVEGQGEEDYAEDEEDGLEASLQNLKV	79.693	9e-139	XP_020271418.1	RAN GTPase-activating protein 1 [Asparagus officinalis]	67.43	1e-115	sp|Q9LE82|RAGP1_ARATH	RAN GTPase-activating protein 1 OS=Arabidopsis thaliana GN=RANGAP1 PE=1 SV=1	At3g63130_2	341	2e-116	KOG1909	Ran GTPase-activating protein	AYT	RNA processing and modification;Nuclear structure;Signal transduction mechanisms	K14319|1|1e-139|407|aof:109846581|Ran GTPase-activating protein 1	-	-	-
531	PB.51999.2|m.12801	type:suspicious-NA len:383 strand:+ pos:3-1151	41571.6	0.594	8	34	PB.51999.4|m.96370	0.92	0.757|1.015|1.000	0.145	34|32|34	0.007|0.978|0.999	PYSSPWITLFPLSSSLLLLLQEKKMSAYLGKYKDELIANAAYIGTPGKGILAADESTGTIGKRLSSINVENIEANRRALRELLFCTPGALQCLSGVILFEETLYQKTASGKPFVDVLKEGGVLPGIKVDKGTVDLSGTNGETTTQGHDDLGKRCAKYYEAGARFAKWRAVLKIGPTEPSQLAINENANGLARYAIICQENGLVPIVEPEILIDGPHDIKKCAEVTERVLAACYKALNDHHVLLEGTLLKPNMVTPGSESEKVAPEVVAEYTVTALLRTVPAAVPAIVFLSGGQSEEEATLNLNAMNQLKGKKPWNLSFSFGRALQQSTLKTWGGKEDNVEKARAAFLARCKANSEATLGEYKGDAGKGEGVSESLHVKDYKY	93.296	0	XP_010912239.1	PREDICTED: fructose-bisphosphate aldolase 1, cytoplasmic [Elaeis guineensis]	86.31	0	sp|P17784|ALFC1_ORYSJ	Fructose-bisphosphate aldolase 1, cytoplasmic OS=Oryza sativa subsp. japonica GN=FBA1 PE=1 SV=2	At2g36460	631	0	KOG1557	Fructose-biphosphate aldolase	G	Carbohydrate transport and metabolism	K01623|1|0.0|693|egu:105038211|fructose-bisphosphate aldolase, class I [EC:4.1.2.13]	GO:0006096//glycolytic process	GO:0004332//fructose-bisphosphate aldolase activity	-
574	PB.58660.2|m.66725	type:confident-5partial len:353 strand:+ pos:3-1061	38828.9	0.48	5	24	-	0.93	0.830|0.956|1.006	0.091	24|24|24	0.007|0.890|0.971	AAVSITPQKTLHFLRKKMSSPVTKLFSFSLLALLAPLNFADTGTHGSEYRLYPKFYDHSCPRAQDIVRSIVAKTVAKEARMAASLLRLHFHDCFVKGCDGSVLLDSTGTFLSEKRSNPNRNSARGFEVIDEIKSALEKACPRIVSCADVLALAARDGTVLSGGPSWEVPLGRRDSLGATLSGSNNNIPAPNNTLPTIITKFKLKGLGLVDLVALSGSHTIGQSRCTSFRQRLYDQTGTGLRDSSLDYSYAAQLQKNCPRSGGDQNLSPLDYVSPAKFDNYYFKNIIAGKGLLSSDEILFTGSAATMKLVQSYADDNELFVRQFADSMIKMGNITPLTGKEGEVRKNCRFINH	78.963	0	XP_010924103.1	PREDICTED: peroxidase 72 [Elaeis guineensis]	66.06	2e-161	sp|Q9FJZ9|PER72_ARATH	Peroxidase 72 OS=Arabidopsis thaliana GN=PER72 PE=1 SV=1	-	-	-	-	-	-	-	K00430|1|0.0|528|egu:105047025|peroxidase [EC:1.11.1.7]	GO:0006979//response to oxidative stress;GO:0042744//hydrogen peroxide catabolic process	GO:0020037//heme binding;GO:0046872//metal ion binding;GO:0004601//peroxidase activity	GO:0005576//extracellular region
648	PB.64414.2|m.50859	type:suspicious-NA len:327 strand:+ pos:3-983	35808.6	0.383	1	3	-	0.74	0.540|0.787|0.886	0.178	3|3|3	0.007|0.811|0.674	TRKLKMEITALAILILASIPATFAQQCGSEANDALCPSSLCCSKWGFCGSTDDYCGEGCQSQCGGGGGGGGGGVEALLSSSQFDQMLLHRNDAVCPARGFYTYEAFVTAANLFSGFATTGDSATKKREIAAFLAQTSQETTGGWQAAPDGPYAWGYCFKAEQGNPSGYCVQSVQWPCVPGKSYYGRGPIQLSYNYNYGQAGEALGYDLLNNPDLVETDVTVSFETALWFWMTPQSPKPSCHDVITGNWIPSPADVEAGRLPGYGVITNIINGGVECGHGPDDKVANRIGFYKRYCDIFGISYGENLDCYNQTPFGRNGLETNTYIE	74.277	3e-172	XP_010941404.1	PREDICTED: chitinase 1 [Elaeis guineensis]	64.38	4e-155	sp|Q9FRV1|CHIA_SECCE	Basic endochitinase A OS=Secale cereale GN=rsca PE=1 SV=1	At3g12500	402	9e-141	KOG4742	Predicted chitinase	R	General function prediction only	K20547|1|5e-173|486|egu:105059691|basic endochitinase B [EC:3.2.1.14]	GO:0006032//chitin catabolic process;GO:0005975//carbohydrate metabolic process;GO:0016998//cell wall macromolecule catabolic process	GO:0004568//chitinase activity;GO:0008061//chitin binding	-
660	PB.67424.1|m.210491	type:confident-5partial len:281 strand:+ pos:1-843	30231.6	0.3	7	10	-	0.93	0.751|1.021|1.023	0.156	9|10|10	0.020|0.985|0.913	TEIKCVVKREDSVVVVIIMEDITNSLGRRWSLRGKTALVTGGTKGIGHAIVEELAGLGAIVHTCSRNEAELNRCLRDWETKKLTVTGSTCDVSSRSDREKLMEKVSSLFEGKLNILVNNAGAALYKPAVDFTTEDFTFLMSTNLESAFHLSQLAHPLLKASGMGSVILISSVAGKVAINGLSIYGATKGAMDQLTRNLACEWAKDNIRTNSIAPGYIKTPLAQPALDDKDFAAGQTSRIPLGYIGESSDVAPIVAFLCMPAASYINGQVIYVDGGRSVNG	68.482	5e-133	XP_010931228.1	PREDICTED: tropinone reductase homolog At5g06060-like [Elaeis guineensis]	65.48	5e-123	sp|A7DY56|TRN1_COCOF	Tropinone reductase OS=Cochlearia officinalis GN=TR PE=1 SV=1	At5g06060	349	9e-122	KOG0725	Reductases with broad range of substrate specificities	R	General function prediction only	K08081|1|9e-134|383|egu:105052187|tropinone reductase I [EC:1.1.1.206]		GO:0016491//oxidoreductase activity	-
755	PB.40533.1|m.113026	type:confident-complete len:99 strand:+ pos:964-1260	11196.8	0.449	3	4	PB.13717.4|m.184615;PB.13717.3|m.180977;PB.47030.3|m.183535;PB.64908.2|m.204830;PB.60784.4|m.195116;PB.64908.1|m.54052;PB.50533.3|m.183668;PB.60784.2|m.38033;PB.60784.3|m.56943;PB.60784.1|m.34159;PB.50533.1|m.47339;PB.47030.1|m.51405	0.75	0.580|0.644|1.026	0.241	4|3|3	0.026|0.078|0.964	MEDRVIELEAIQKVLLEGIEAYDKMEADLVSAKQRLMKILQSKDKKATLLEMVEHNELNRSVLALLDENIASAQANDQREAAEFMENIRATMLKYITV	81.633	2e-48	XP_008784643.1	PREDICTED: uncharacterized protein LOC103703539 [Phoenix dactylifera]	-	-	-	-	-	-	-	-	-	-	-	-	-	-	-
786	PB.41.13|m.144453	type:suspicious-NA len:998 strand:+ pos:117-3110	113478	0.536	21	149	PB.41.18|m.166038	0.85	0.698|0.912|0.928	0.128	146|147|142	0.007|0.043|0.037	MASTPLPTTSSQFCSITRLADLRSRRIGVWNRLSISTRSFPRKSRLLFVKSVISDQEAKDPISDNGLQTALLDAHDSSTIASSIKFHAEFTPSFSVDHFQLPKAYFATAESVRDQLIKNWNATYEQYDKLNMKQAYYLSMEFLQGRALLNAIGNLELTGKYAEALTKLGHNLESVARQEPDAALGNGGLGRLASCFLDSLATLNYPAWGYGLRYKYGLFQQNITKDGQEEVAESWLEMGNPWEIVRHDVSYPVKFYGKVVLGSDGRNHWIGGENIKAVAYDVPIPGYKTKTTINLRLWSTKSPSKDFDLQAFNSGEHTKAYEAHLNAEKICYILYPGDDSMEGKILRLKQQYTLCSASLQDIIARFEKRSGNLINWEDFPSKVAVQMNDTHPTLCIPEL…	78.252	0	XP_020249613.1	alpha-1,4 glucan phosphorylase L isozyme, chloroplastic/amyloplastic isoform X2 [Asparagus officinalis]	73.87	0	sp|P27598|PHSL_IPOBA	Alpha-1,4 glucan phosphorylase L isozyme, chloroplastic/amyloplastic OS=Ipomoea batatas PE=2 SV=1	At3g29320	730	0	KOG2099	Glycogen phosphorylase	G	Carbohydrate transport and metabolism	K00688|1|0.0|1618|aof:109827058|glycogen phosphorylase [EC:2.4.1.1]	GO:0005975//carbohydrate metabolic process	GO:0102250//linear malto-oligosaccharide phosphorylase activity;GO:0008184//glycogen phosphorylase activity;GO:0030170//pyridoxal phosphate binding;GO:0102499//SHG alpha-glucan phosphorylase activity	-
833	PB.56066.4|m.58465	type:confident-5partial len:368 strand:+ pos:2-1105	41561.9	0.371	1	1	-	0.97	0.833|1.023|1.067	0.124	17|18|18	0.020|0.979|0.606	LVSSASILSPVVAIVIVGKRSYFSPVTVKFKESAELSMDSKGLNRNLYSPIEPYESGFLKVSDIHTLYWEQSGNPSGHPVVFLHGGPGAGTSASNRQFFDPEFYRIILFDQRGAGKSTPHACLDENTTWDLVNDIEKLREHLKIPEWQVFGGSWGSTLALAYSQSHPDKVTGIVLRGIFLLRKKELDWFYEGGAAAIFPDAWEPFRDFIPENERGCFIDAYSKRLKSNDTNIQVMAARNWTTWELMTAHLIQNEENVKRGDDDKFSLAFARIENHYFLNKGFLQSDSYLLDNIDKIRHIKTVIVQGRYDVCCPMMSAWDLHKAWPEAEFKVVPDAGHSANEAGIAAELVAANEKFKNILKTGEALHE	84.195	0	XP_010924590.1	PREDICTED: proline iminopeptidase [Elaeis guineensis]	81.96	0	sp|P93732|PIP_ARATH	Proline iminopeptidase OS=Arabidopsis thaliana GN=PIP PE=2 SV=3	-	-	-	-	-	-	-	K01259|1|0.0|625|egu:105047374|proline iminopeptidase [EC:3.4.11.5]	-	-	-
882	PB.9724.1|m.173755	type:confident-complete len:340 strand:+ pos:2499-3518	36411.2	0.732	3	51	-	0.87	0.646|0.846|1.115	0.235	91|90|90	0.007|0.030|0.033	MILINDNSQVFLRRSRPHVLPAVELGYDESVKIITYVQRTASPLATIRIGGDQRRTPVSPRVPAFSGRGPAPEEVGILKPDIIGPGVNIVVASPFLVGPPSTYPNPTESTTTFTTTSGTSISTPQLAGIAAMLIASHSNPVWSPAMVKSAIMTSASTLNQNNEKIRDEKGNVEADVFAIGAGHVNPLAVNSPGLVYRTTPDDYVNYLCALFANDRTRVELATNRIGVACDPKANIPPKDLNYPAIALYVKRHGTVKVTRKVMNVGAARSQYTLKVDPMRGFAVTSSTTSIVFDQANQEKSYTLQFTATTASPDTLVEGQVKLTAGNLVVRIPIAIIVKL	42.566	3e-74	XP_019175965.1	PREDICTED: subtilisin-like protease SBT1.7 [Ipomoea nil]	40.24	6e-57	sp|O64495|SBT12_ARATH	Subtilisin-like protease SBT1.2 OS=Arabidopsis thaliana GN=SBT1.2 PE=2 SV=1	-	-	-	-	-	-	-	K15333|1|3e-26|114|nsy:104224633|tRNA guanosine-2'-O-methyltransferase [EC:2.1.1.34]!K12619|2|4e-19|93.2|ghi:107940264|5'-3' exoribonuclease 2 [EC:3.1.13.-]!K13199|3|7e-14|77.0|mtr:MTR_7g081660|plasminogen activator inhibitor 1 RNA-binding protein!K14568|4|3e-07|56.6|dct:110101229|rRNA small subunit pseudouridine methyltransferase Nep1 [EC:2.1.1.260]		GO:0004252//serine-type endopeptidase activity	-
916	PB.46322.1|m.9183	type:confident-5partial len:440 strand:+ pos:2-1321	48138.2	0.064	1	3	-	0.91	0.681|1.048|1.002	0.2	4|3|4	0.018|0.951|0.992	PAKSRSSVPPPVNIPFDRCLPHKASSSFSTRPRIRKTESMALASSAVALPPSASGNRDRPPPSIRTYSRPNLLYSNYPHFLPKTLILPPQNLTLTPLLRLRFSPAPSFSATESALSSEKGTKFQEWDFITAKFAAAANAPFLLLQLPQIVLNAQNLLAGNKAALFAIPWLGMLTGLLGNLSLLSYFAKKKETEAVVVQTLGVISTYVVIAQLAMAESMPLPHFAATSAVVGLGLILNLFNYFGWLGEGVWRAWEDFITIGGLSVLPQVMWSTFVPFVPNSILPGAIAGTLSVLAVVMARVGKLSEQGTKLVRSTSGWTATLLFMWMPVAQMWTNYLNPDNIKGLSAFSMLLSMLGNGLMIPRALFIRDLMWFTGSAWASFLHGWGNLLCMYCFNSISKG…	87.385	0	XP_020263428.1	maltose excess protein 1-like, chloroplastic, partial [Asparagus officinalis]	74.41	8e-166	sp|Q7XTQ5|MEX1_ORYSJ	Maltose excess protein 1-like, chloroplastic OS=Oryza sativa subsp. japonica GN=Os04g0602400 PE=2 SV=2	-	-	-	-	-	-	-	-			GO:0016021//integral component of membrane
977	PB.58772.2|m.185008	type:confident-5partial len:268 strand:+ pos:2-805	29299.9	0.479	1	9	-	0.89	0.729|0.920|1.029	0.152	9|9|9	0.049|0.929|0.943	ALISSKNCAPIMLRLAWHDAGTYDVNTKTGGPNGSIRFEEEYSHAANAGLKIAIDLLEPIKEKHPKITYADLYQLAGVVAVEITGGPTIDFVPGREDSSVCPREGRLPDASKGPQHLRDVFYRMGLSDKDIVALSGGHTLGRAHPERSGFEGAWTKEPLKFDNSYFVEVLKEESEGLLKLPTDKALVEDPVFRCYVELYAEDEDAFFRDYAESHKKLSELGFTPPRSGSSSKCDVKSGAVLAQSAIGVAVAAAVVAVSFLYEISKRK	86.842	7e-168	XP_020273545.1	probable L-ascorbate peroxidase 4 [Asparagus officinalis]	84.27	5e-157	sp|Q6ZJJ1|APX4_ORYSJ	Probable L-ascorbate peroxidase 4, peroxisomal OS=Oryza sativa subsp. japonica GN=APX4 PE=2 SV=1	-	-	-	-	-	-	-	K00434|1|1e-168|471|aof:109848456|L-ascorbate peroxidase [EC:1.11.1.11]	GO:0042744//hydrogen peroxide catabolic process;GO:0006979//response to oxidative stress;GO:0034599//cellular response to oxidative stress;GO:0000302//response to reactive oxygen species	GO:0020037//heme binding;GO:0004130//cytochrome-c peroxidase activity;GO:0004601//peroxidase activity	GO:0016021//integral component of membrane;GO:0009507//chloroplast
1093	PB.31260.11|m.200592	type:suspicious-NA len:229 strand:+ pos:1-687	25316.9	0.171	1	4	-	0.82	0.455|0.836|1.174	0.36	4|3|4	0.015|0.621|0.396	TSNPSISRSIAKLAKYGKVPSPLLSPPRPPPGCSARLPSRQQRPPHRRRPPHDNQLSFESAAFVMQGGCNWVLYNEAGGFQSNTHGRGVGCTLRLNNFGQLEIPTANSNTPVWVSPRNVIPVRGDYAAVLDPDQHVTIDGPAIWFTPAPNRHERGATVSNIPRVRNVLISSQVMSYNAQLAKREYSLVKRDDCNLALTKGSQTNIVWESGTTGRVQHCFMRLGHTGLI	90.341	3e-112	Q9FVA1.1	RecName: Full=Mannose-specific lectin 1; AltName: Full=Agglutinin; Short=CVA; AltName: Full=Mannose-binding lectin; Contains: RecName: Full=Mannose-specific lectin 1 chain 1; AltName: Full=CVA-DOM1; Contains: RecName: Full=Mannose-specific lectin 1 chain 2; AltName: Full=CVA-DOM2; Flags: Precursor	90.34	2e-114	sp|Q9FVA1|LEC1_CROVR	Mannose-specific lectin 1 OS=Crocus vernus GN=LECCVA1 PE=1 SV=1	-	-	-	-	-	-	-	-	-	-	-
1459	PB.75224.1|m.177365	type:confident-5partial len:103 strand:+ pos:1-309	11332.7	0.167	1	7	-	0.97	0.799|1.042|1.055	0.144	6|6|7	0.025|0.947|0.853	PGTIDIAPAVESDLRRAAARVMDKARELCTKNQVADVAYETVEGDPRNVLCEEVEKYQADVLAVGNHGYGAIKRAVLGSVSDYCSHHAHCTVMIVKKPKLKH	79.412	1e-54	ONK61601.1	uncharacterized protein A4U43_C08F31660 [Asparagus officinalis]	42.59	4e-13	sp|Q8LGG8|USPAL_ARATH	Universal stress protein A-like protein OS=Arabidopsis thaliana GN=At3g01520 PE=1 SV=2	-	-	-	-	-	-	-	-	GO:0006950//response to stress	-	-
1545	PB.65320.1|m.29008	type:confident-5partial len:209 strand:+ pos:1-627	23415	0.505	1	3	-	0.89	0.810|0.832|1.019	0.115	10|10|9	0.026|0.288|0.950	ASAGSNPVTGVVFEPFKELQTELNLVPTSPDLSLARHKFVDDCETAINVQINVEYNASYVYHAMFAYFDRDNVALNGLAKFFKESSEEERGHAEKLMVYQNKRGGRVKLQSILLPLTEFDHPEKRDALYAMELALSLEKLVNEKLLILHDIADRNNDPQLADFVVSDFLEEQVGAIKKISEYVAQLRRIGKGHAVWHFNQALLGGNAA	79.227	4e-117	ABJ99593.1	ferritin [Lycoris aurea]	79.19	9e-115	sp|Q948P6|FRI3_SOYBN	Ferritin-3, chloroplastic OS=Glycine max PE=2 SV=1	At2g40300	318	8e-111	KOG2332	Ferritin	P	Inorganic ion transport and metabolism	K00522|1|7e-115|331|cit:102615169|ferritin heavy chain [EC:1.16.3.2]	-	-	-
1585	PB.43374.1|m.15799	type:confident-complete len:432 strand:+ pos:68-1363	42915.3	0.079	2	2	PB.22366.1|m.1209	0.93	1.385|0.970|0.439	0.474	2|2|2	0.396|0.987|0.050	MSGSYGGGSGGGYVRGGGGGGYSSNRGGGGYGRDGGGGYGGDRGGGRGGGGGGGGGRGGGRGGSSGRDGDWPCPNPSCGNSNFARRTECNKCGTPAPASAGGGGGGGSGGYNRGGGDYNSGGGGGGGRSGGYNDTGGGGRSYDNDRSGRSDNYRGGRDDSGGYGSQGREDSGYAQIPPPSYGSGPAGNYPHAPKSYGGGNGYGADAVPPPASYGGPSSLPPTYGAPPPNPYEVPARGPPQGGYGGGSRGGPPPQNYGGGGGGGGYPSSEPSAKVKQCDADCGDTCDNARIYISNLPPDVTTDELQELFGGIGMVGKIKQKRGYKDQWPWNIKIYTDEAGKNKGDACLAYEDPSAAHSAGGFYNNYDMRGYKINVSMAEKSAPRAPPAYGQGGGGRGGGY…	57.619	1e-117	XP_010937932.1	PREDICTED: transcription initiation factor TFIID subunit 15b-like isoform X1 [Elaeis guineensis]	52.13	2e-73	sp|Q94KD0|TA15B_ARATH	Transcription initiation factor TFIID subunit 15b OS=Arabidopsis thaliana GN=TAF15B PE=1 SV=1	At5g58470	219	1e-65	KOG1995	Conserved Zn-finger protein	R	General function prediction only	K13098|1|2e-118|357|egu:105057147|RNA-binding protein FUS	-	-	-
1616	PB.22009.9|m.57422	type:confident-5partial len:355 strand:+ pos:2-1066	39361.8	0.302	1	2	-	0.91	0.803|0.856|1.057	0.134	9|9|9	0.022|0.370|0.736	GRKREGEAMAKNVSNKKVILKHYISGFPKESDMEIVTAEQEESSLKVPEGSNGVFLKNLYLSCDPYMRSRMSKHDEASYVPDFVPGSVISGFGVGKVLDSKHPDFKVGDFVWGMTGWEEYSLITSPNLFKIKYTDVPLSYYTGLLGMPGFTAYVGFYEIGSPKKGEYVFISAASGAVGQLVGQFAKLMGCYVVGSAGSDEKVSLLKNKFGFDEAFNYKNEADLSATLKRYFPEGIDIYFENVGGAMLDAVLLNMRLHGRISACGMISQYNLENPEGVCNLMQVVAKRIRIQGFIVFDHYHLYDQFLEKTVPYIKEGKITYVEDVAEGLESAPSALIGLFSGRNVGKQLVVVARE	81.525	0	ONK77369.1	uncharacterized protein A4U43_C02F5810 [Asparagus officinalis]	72.05	0	sp|Q9SLN8|DBR_TOBAC	2-alkenal reductase (NADP(+)-dependent) OS=Nicotiana tabacum GN=DBR PE=1 SV=1	At3g03080	488	3e-174	KOG1196	Predicted NAD-dependent oxidoreductase	R	General function prediction only	K19825|1|0.0|521|ini:109156911|2-alkenal reductase (NADP+) [EC:1.3.1.102]!K07119|2|0.0|518|vvi:100250942|uncharacterized protein	-	-	-
1618	PB.2342.6|m.94711	type:suspicious-NA len:178 strand:+ pos:48-581	19478.3	0.073	1	2	PB.2342.1|m.7528;PB.15451.2|m.151009;PB.2342.11|m.122735;PB.2342.14|m.135805;PB.24314.1|m.138603;PB.17111.1|m.173621;PB.2342.10|m.114477;PB.15451.1|m.131606;PB.2342.15|m.144301;PB.26510.1|m.148219;PB.2342.7|m.97484;PB.2342.13|m.132035;PB.2342.3|m.29441;PB.2342.12|m.132018;PB.2342.2|m.20739;PB.2342.9|m.103208	0.83	0.649|1.397|0.441	0.503	2|2|2	0.216|0.499|0.037	MDQVDVSGGGDRAAGFHPNEAIAAVQDEDQFYGDEEDYEDLYNDVNVGEGFHQSVQRTEHEHRNEPAPPSHPPPPRQQIPSATAAELSEKIQIQEPKSETPADRLNIGFLEPPQALPTVPAPPPPRPQPPVQVRPDLGQPPNTNFQNEGFSRQGGNFAAGNANGGGRWWRYDDTICR	41.566	7e-20	XP_010928099.2	PREDICTED: LOW QUALITY PROTEIN: RNA-binding protein cabeza-like [Elaeis guineensis]	-	-	-	-	-	-	-	-	-	-	-	K14398|1|1e-20|92.4|egu:105049966|cleavage and polyadenylation specificity factor subunit 6/7	-	-	-
1677	PB.67903.1|m.31199	type:confident-5partial len:289 strand:+ pos:3-869	32850.8	0.438	1	2	-	0.71	0.467|0.449|1.202	0.43	2|2|2	0.026|0.074|0.695	PSSAVGKEKMARHFLEQTFFFATIMVVASANFLTDIDITWGDGRGKMLDDGDLLQLSLDKASGSGFQSKQEYLFGWVDMQIKLVPGNSAGTVTAYYLSSQGPTHDEIDYEFLGNISGEPYILHTNIFTQGKGDREQQFYLWFDPRLDFHTYSILWNHQQILFYVDGTPIRVFKNSQGTGVPYPKDQAMRLYSSLWDADDWATRGGLVKTDWAQAPFVASYRKFATDACVWEGGKSSCSASSGSWWDQSLDDDGSKKLEWVREKYMIYDYCRDYARFPQGLPAECSLSP	89.643	0	ADM18305.1	xyloglucantransglusylase/hydrolase 1 [Gladiolus grandiflorus]	67.16	4e-136	sp|Q38910|XTH23_ARATH	Probable xyloglucan endotransglucosylase/hydrolase protein 23 OS=Arabidopsis thaliana GN=XTH23 PE=2 SV=1	-	-	-	-	-	-	-	K14504|1|4e-163|457|egu:105052932|xyloglucan:xyloglucosyl transferase TCH4 [EC:2.4.1.207]	GO:0042546//cell wall biogenesis;GO:0071555//cell wall organization;GO:0010411//xyloglucan metabolic process	GO:0016762//xyloglucan:xyloglucosyl transferase activity;GO:0004553//hydrolase activity, hydrolyzing O-glycosyl compounds	GO:0005618//cell wall;GO:0048046//apoplast
1735	PB.62837.1|m.45691	type:confident-5partial len:185 strand:+ pos:2-556	20723.9	0.168	2	5	-	0.82	0.616|0.746|1.103	0.252	3|4|4	0.015|0.128|0.647	SPAKKRKKRKIVWKSKIGIRIGMDFRVMGLDAPMLSALHHLMEDVTGSPEKEKATAPTRSYVRDATAMAATPLDIKELPDSYVFVVDMPGVKSGEIKVQVEDDGLLVIMGERKREDGDKEDQHHKYLRMERRMGKFMRKFSLPENVDTENGISAVCQDGVLTVTVQKKPPPEPKKPKTIEVKVA	69.753	1e-67	XP_015935030.1	17.9 kDa class II heat shock protein [Arachis duranensis]	66.87	4e-64	sp|P05477|HSP21_SOYBN	17.9 kDa class II heat shock protein OS=Glycine max GN=HSP17.9-D PE=3 SV=1	At5g12020	159	6e-50	KOG0710	Molecular chaperone (small heat-shock protein Hsp26/Hsp42)	O	Posttranslational modification, protein turnover, chaperones	K13993|1|2e-68|209|aip:107606291|HSP20 family protein	-	-	-
1764	PB.35497.2|m.67313	type:suspicious-NA len:358 strand:+ pos:3-1076	39643	0.317	11	16	PB.35497.1|m.60795;PB.51359.1|m.15657;PB.51359.2|m.65969	0.92	0.771|0.947|1.056	0.144	16|14|13	0.011|0.817|0.537	SSHSSSGWNSWNHFQCSIDEKLIKETADAMVSTGLSSLGYHYINLDDCWGEQNRDSQGNLVAKASTFPSGIKALADYVHAKGLKLGIYSDAGSQTCSKTMPGSLGHEEQDAKTFAAWELDYLKYDNCNNPGSSPQDRYAPMGKALQNSGRNIFFSLCEWGQDNPATWAGSVGNSWRTTGDIEDNWDSMTSCADQNDQWASYAKPGGWNDPDMLEVGNGGMTTEEYRSHFSIWALAKAPLLIGCDIRSIDSETLNILNNSEVISVNQDILGIQGKKVKSDGNLEVWAGPLSRRRVALVLWKRGSYEASITANWSDMGLKSSTLARARDLWEHKTTSVRGEITANVGSHACKMYILTPK	77.869	0	XP_020263689.1	alpha-galactosidase-like [Asparagus officinalis]	75	0	sp|Q8RX86|AGAL2_ARATH	Alpha-galactosidase 2 OS=Arabidopsis thaliana GN=AGAL2 PE=1 SV=1	At5g08370	508	0	KOG2366	Alpha-D-galactosidase (melibiase)	G	Carbohydrate transport and metabolism	K07407|1|0.0|602|aof:109839609|alpha-galactosidase [EC:3.2.1.22]	GO:0005975//carbohydrate metabolic process	GO:0052692//raffinose alpha-galactosidase activity	-
1828	PB.20589.3|m.128686	type:confident-5partial len:714 strand:+ pos:1-2142	79178.4	0.243	13	14	PB.20589.4|m.127162;PB.20589.2|m.24539;PB.20589.1|m.16811;PB.20589.5|m.160927	0.9	0.787|0.925|0.986	0.102	14|14|14	0.007|0.512|0.968	SGQRLSVKAMAAPTEEVKRQVPLKDYRNIGIMAHIDAGKTTTTERILYYTGRNYKIGEVHEGTATMDWMEQEQERGITITSAATTTFWDNHRINIIDTPGHVDFTLEVERALRVLDGAICLFDSVAGVEPQSETVWRQADKYGVPRICFVNKMDRLGANFFRTRDMIITNLGAKPLVLQLPIGAEDTFKGVVDLLKMKAIVWSGEELGAQFTYQDIPDDLQDLAQDYRTQMVETVIDLDDEAMESYLEGIEPDEQTLKRLIRKGTISASFVPVLCGSAFKNKGVQPLLDAVVDFLPSPLEVPPMKGTDADNPEIFIERRPSDDEPFAGLAFKIMSDSFVGSLTFVRVYSGKLTAGSYVLNSNKGKRERIGRLLEMHANSREDVKSALTGDIVALAGLKD…	92.068	0	XP_020263463.1	elongation factor G-1, chloroplastic, partial [Asparagus officinalis]	90.52	0	sp|Q9SI75|EFGC_ARATH	Elongation factor G, chloroplastic OS=Arabidopsis thaliana GN=CPEFG PE=1 SV=1	At1g62750	1303	0	KOG0465	Mitochondrial elongation factor	J	Translation, ribosomal structure and biogenesis	K02355|1|0.0|1338|aof:109839451|elongation factor G		GO:0003746//translation elongation factor activity;GO:0003924//GTPase activity;GO:0005525//GTP binding	GO:0009507//chloroplast
1874	PB.1922.14|m.131171	type:confident-complete len:772 strand:+ pos:36-2351	83036.6	0.514	5	51	-	0.89	0.581|0.914|1.176	0.298	49|47|49	0.007|0.186|0.033	MDNSSFIFLLFMISLPITILSELIIPPKNVSESFNILNQPEFYIVHVRPPNNVGQFLRDEDRESWHKSFLPTTLLDSGEPRLVYSYKDVISGFAARLTPEEVKAMESKDGFMGAYVSEEYVPDTTYTPQFLHLAEAEGLWKSKNYGAGIIVGVLDSGIAPNHVSFKPDGVPNLPPGKQKSRPCVFGPSFTACNNKIIGGVGFFQGNRIPANDETGHGTHCASAVAGNFVANANVLGNAVGTASGTAPHAHLMVYKICQGVCTGMDILAGIDQALEDGVDVLSISKSLRTKDGKPPPFDRDSYAKGTFRAIDRGIFVSMAASNGGPSPSTVMNVFPWALTVGASFVDRTLLGMVVLPSPYGTLQGESANEKDELLNLQLVYPGLGGDPKAKTCNRGSFAP…	46.248	0	XP_008802434.2	PREDICTED: subtilisin-like protease SBT1.7 [Phoenix dactylifera]	39	5e-143	sp|O64495|SBT12_ARATH	Subtilisin-like protease SBT1.2 OS=Arabidopsis thaliana GN=SBT1.2 PE=2 SV=1	-	-	-	-	-	-	-	K15333|1|6e-62|231|nsy:104224633|tRNA guanosine-2'-O-methyltransferase [EC:2.1.1.34]!K12619|2|1e-30|134|ghi:107940264|5'-3' exoribonuclease 2 [EC:3.1.13.-]!K13199|3|4e-13|77.4|mtr:MTR_7g081660|plasminogen activator inhibitor 1 RNA-binding protein!K13124|4|4e-09|61.2|lsv:111889439|mitogen-activated protein kinase organizer 1!K14568|5|2e-07|59.3|dct:110101229|rRNA small subunit pseudouridine methyl…		GO:0004252//serine-type endopeptidase activity	-
1985	PB.55408.7|m.203605	type:confident-5partial len:297 strand:+ pos:2-892	32493.4	0.507	12	153	PB.55408.8|m.206880;PB.55408.1|m.39102;PB.55408.6|m.199968;PB.55408.9|m.207330;PB.55408.2|m.46914	0.95	0.796|1.066|0.979	0.138	149|143|144	0.007|0.030|0.577	SKAKPIHGFFDSSLPPSPPHSHLFVEYIGSQFTGVKFTDVPINPRITNFQFVLSFAIDYTPSSPHTPTNGKFNVFWDSATLGPAQISALKSSHPNVRVAVSLGGATVGTKTTVQFHPSSVDSWVNNAVSSLTRIVHRYGLDGIDIDYESFQNADASTFAECIGRLVTTLKRNGVIRFASIAPFPGVEEYYLALWNRYKNVIDHINFQFYAYDASTTVSQFLGYYDNAVSKYKGGNLLISFSTEVNGGGLGADRGFFDAAKKLKAEGKLHGIAVWTADTSKRNGFRYDEEAQSLLVS	63.082	7e-123	XP_020092390.1	chitinase 2-like [Ananas comosus]	57.55	2e-106	sp|Q7M443|CHIT2_TULBA	Chitinase 2 OS=Tulipa bakeri PE=1 SV=1	-	-	-	-	-	-	-	-	GO:0005975//carbohydrate metabolic process	GO:0004553//hydrolase activity, hydrolyzing O-glycosyl compounds	-
1993	PB.26665.2|m.23600	type:likely-NA len:689 strand:+ pos:228-2294	74292.7	0.362	14	21	-	0.88	0.760|0.852|1.015	0.129	20|20|21	0.007|0.030|0.941	MASSAAQIHPHHLCSFSSHFFGGRSRPYKSIHYSSRTKRNDRFRPLRVSNEKVVGIDLGTTNSAVAAMEGGRPTIVTNAEGQRTTPSVVAYTKNGDRLVGQIAKRQAVVNPESTFFSVKRFVGRKMAEVDEEAKQVSYKVVRDDNGNVKLVCPAIGKQFAPEEISAQVLRKLVDDASKFLNEKVTKAVITVPAYFNNSQRTATKDAGRIAGLEVLRIINEPTAASLAYGFEKKNNETILVFDLGGGTFDVSVLEVGDGVFEVLSTSGDTHLGGDDFDKRIVDWLATNFKIDEGIDLLKDKQALQRLTETAERAKIELSSLTQTNISLPFITATADGPKHIETTLTRVKFEELCSDLLDRLKAPVETALKDANLSYKDLDEVILVGGSTRIPAVQELVKK…	84.091	0	XP_009406395.1	PREDICTED: stromal 70 kDa heat shock-related protein, chloroplastic-like [Musa acuminata subsp. malaccensis]	81.95	0	sp|Q02028|HSP7S_PEA	Stromal 70 kDa heat shock-related protein, chloroplastic OS=Pisum sativum GN=HSP70 PE=2 SV=1	At5g49910	1125	0	KOG0102	Molecular chaperones mortalin/PBP74/GRP75, HSP70 superfamily	O	Posttranslational modification, protein turnover, chaperones	K03283|1|0.0|1179|mus:103989312|heat shock 70kDa protein 1/2/6/8	GO:0006457//protein folding	GO:0051082//unfolded protein binding;GO:0005524//ATP binding	-
2118	PB.74947.2|m.32440	type:confident-5partial len:126 strand:+ pos:2-379	14128.9	0.368	1	6	-	0.97	1.078|0.460|1.385	0.471	5|5|6	0.665|0.030|0.314	GQKPHNQASVSHSSDPVISDPMAEEKHHLFHHEHKEETHLEQEKHHKNKEHFGEAETAAAGAFALYEKHEAKKDPEHAHKHKIEEEIAAAAAVAGGGYAFHEKHEKKEQKIEAESTGEKKHHHLF	76	8e-27	ACZ60124.1	abscisic stress ripening [Musa ABB Group]	69.35	3e-14	sp|P37219|ASR2_SOLLC	Abscisic stress-ripening protein 2 OS=Solanum lycopersicum GN=ASR2 PE=4 SV=1	-	-	-	-	-	-	-	-	GO:0006950//response to stress	-	-
2132	PB.45911.2|m.79805	type:confident-complete len:360 strand:+ pos:325-1404	41392.6	0.109	3	3	PB.45911.3|m.96154	0.9	0.639|1.000|1.067	0.23	3|3|3	0.022|1.000|0.867	MVFTLDAAEELKIPVLLFHTISACGFLGYLNYPELHQKGYTPLKDESYLANGYLDTPIDWIPGMNNIRLRDLPSFIRTTDPNDVMLNVMIKRKGYASRAKSLILNTFEELDQDVLTGIRSSLPNNNLYTIGPLSPICRQISSNEHSSIGSNLLKEDSRCLDWLDKQADRSVIYVNFGSITVVTAQQLEEFAWGLANSDHPFLWVVRPDLVSGEEAKLQEEFIKETEGRGISMLAPWCNQEAVLAHRSVGGFLTHCGWNSTLESIYEGVPMICWPFFAEQPTNCRFVCTHWGIGMDMDGEVRRERVEELVREMMEREKGKEMRKKAMEWKEKARRAIEPGGSSYANLERLVEDLANMKRM	65.254	1e-168	OVA18812.1	UDP-glucuronosyl/UDP-glucosyltransferase [Macleaya cordata]	58.19	3e-149	sp|F8WKW1|UGT2_GARJA	7-deoxyloganetin glucosyltransferase OS=Gardenia jasminoides GN=UGT85A24 PE=1 SV=1	At1g22360	409	4e-141	KOG1192	UDP-glucuronosyl and UDP-glucosyl transferase	GC	Carbohydrate transport and metabolism;Energy production and conversion	K21374|1|2e-160|461|tcc:18608265|7-deoxyloganetin glucosyltransferase [EC:2.4.1.324]	GO:0008152//metabolic process	GO:0016758//transferase activity, transferring hexosyl groups	-
2252	PB.31260.14|m.207337	type:suspicious-NA len:214 strand:+ pos:47-688	23214.8	0.277	1	2	-	0.93	0.383|0.919|1.476	0.547	2|2|2	0.011|0.947|0.256	MAKSLVLSSLLLALLLAAPLASLADNNVLLTGDVLHTDNQLSFESAAFVMQGGCNWVLYNEAGGFQSNTHGRGVGCTLRLNNFGQLEIPTANSNTPVWVSPRNVIPVRGDYAAVLDPDQHVTIDGPAIWFTPAPNRHERGATVSNIPRVRNVLISSQVMTDNAQLATRDYSLVLRDDCNLALTKGSKTNIVWESGTTGRVQHCFMRLGHTGLI	92.593	7e-126	Q9FVA1.1	RecName: Full=Mannose-specific lectin 1; AltName: Full=Agglutinin; Short=CVA; AltName: Full=Mannose-binding lectin; Contains: RecName: Full=Mannose-specific lectin 1 chain 1; AltName: Full=CVA-DOM1; Contains: RecName: Full=Mannose-specific lectin 1 chain 2; AltName: Full=CVA-DOM2; Flags: Precursor	92.59	5e-128	sp|Q9FVA1|LEC1_CROVR	Mannose-specific lectin 1 OS=Crocus vernus GN=LECCVA1 PE=1 SV=1	-	-	-	-	-	-	-	-	-	-	-
2355	PB.60429.4|m.45336	type:confident-complete len:215 strand:+ pos:182-826	22654.1	0.444	6	25	PB.60429.6|m.58966;PB.60429.2|m.36145;PB.60429.1|m.24689;PB.60429.7|m.214556;PB.60429.3|m.45831	0.91	0.780|0.945|1.018	0.122	25|25|24	0.007|0.814|0.924	MQNDCNLVLYNGHGGFVSGTNGNGFTNCTLTLDDHGQLAIYGSGLSSPVWTTPLTSPTKKGNYAAVLGPDGQVNVYGPAVWSTPPRNAGASHDDGDGAEKANIPMVRNVLFSSQALYNNAQLATRDYTFVMGADCNLVLNKASGGVVLWQSGTSGKGKNCFARLGHGGQLAVVDDRYRTLWSSKPVGKSVGDYVLVLQINGQAVVYGPAVWSTA	62.791	3e-83	XP_010931185.1	PREDICTED: mannose-specific lectin 3-like [Elaeis guineensis]	58.88	4e-85	sp|P86626|LEC3_CROVR	Mannose-specific lectin 3 OS=Crocus vernus PE=1 SV=3	-	-	-	-	-	-	-	K13950|1|5e-07|53.9|pda:103713144|para-aminobenzoate synthetase [EC:2.6.1.85]	-	-	-
2472	PB.53269.1|m.13421	type:confident-5partial len:361 strand:+ pos:2-1084	39922.4	0.219	3	6	-	0.8	0.740|0.913|0.751	0.097	6|6|5	0.234|0.917|0.037	SHTQITMAKSALLALAVAFALVTAARSIPFGEKDLSSEDDLWSLYERWRSHHTVSRDLDEKKERFNVFKENVKFIHEFNQKKDVTYKLSLNKFGDLTNEEFRNTYAGTKKRASAKGTHGAFMHEHVLSLPFSVDWRANGAVAPVKDQGQCGSCWSFSTIAAVEGINEIKTNELIVLSEQELIDCDTDMNSGCNGGLMDYAFDYITNNGGITTEFAYPYSAEQGTCASQENSPAVTIDGYQDVPANNEAALLKAVANQVVSVAIEASGTSFQFYSEGVFSGPCGTELDHGVAVVGYGATRDGTKYWIVRNSWGPNWGESGYIRMKRDISSRHGLCGIAMQASYPIKTSPNPIEKVSPKDEL	74.581	0	AAR92155.1	putative cysteine protease 2 [Iris x hollandica]	70.8	0	sp|P43156|CYSP_HEMSP	Thiol protease SEN102 OS=Hemerocallis sp. GN=SEN102 PE=2 SV=1	At5g50260	465	1e-164	KOG1543	Cysteine proteinase Cathepsin L	O	Posttranslational modification, protein turnover, chaperones	K16292|1|0.0|518|egu:105052979|KDEL-tailed cysteine endopeptidase [EC:3.4.22.-]		GO:0008234//cysteine-type peptidase activity	-
2650	PB.46128.2|m.3911	type:confident-5partial len:339 strand:+ pos:2-1018	37318.4	0.293	9	10	PB.46128.3|m.7729;PB.46128.7|m.17476	0.92	1.001|0.766|0.990	0.133	9|9|8	0.996|0.043|0.964	SSVSGIVATVFGATGFLGRYVVQQLAKMGSQVLVPFRGSEDSQRHLKLMGDLGQIVPMKYNPRDEDSIKAVMAKSNVVLNLIGREYETRNFSFEEVNHGMAEQLAVIAKEHGGIMRFIQISCLGASLSSPSRMLRAKAAAEESILREFPEATIMRPATLIGTEDRVLNRWAQFVKKWTFLPLFGDGSTKIQPVYVVDVAAAIIASLKDDGTSMGKLYELGGPDVFSTHELAELMFETIREWPRYVKVPFPIARVVASPREFLLKKVPCPLPNPDIFNLDQINALTTDTVVSENALKFSDLGIAPHKLKGYPTEYLISYRKGGPSFGSTVSERVTGSDL	92.308	0	XP_020274754.1	NADH dehydrogenase [ubiquinone] 1 alpha subcomplex subunit 9, mitochondrial [Asparagus officinalis]	80.18	0	sp|Q9SK66|NDUA9_ARATH	NADH dehydrogenase [ubiquinone] 1 alpha subcomplex subunit 9, mitochondrial OS=Arabidopsis thaliana GN=At2g20360 PE=1 SV=2	At2g20360	538	0	KOG2865	NADH:ubiquinone oxidoreductase, NDUFA9/39kDa subunit	C	Energy production and conversion	K03953|1|0.0|653|aof:109849345|NADH dehydrogenase (ubiquinone) 1 alpha subcomplex subunit 9	-	-	-
2668	PB.59529.3|m.53931	type:confident-5partial len:267 strand:+ pos:3-803	29332	0.286	7	10	PB.59529.4|m.187877;PB.59529.1|m.5797	0.96	0.803|1.003|1.065	0.137	9|10|9	0.007|0.995|0.462	QNSEAAVFRQPNTVGILGSVSATSTANFIEKLVKWSSRDGQHDSLPFIAYNDPVLNRELSSFQKNYVTSRNSSSACGFNRSVIVDNLKQKRVFLEKSGARCIVMPCHISHVWFDEVSEGCSLPFCHLGGAVAEELKEAKLKPIEAGSNLRVGVLASQAILSAGSYREQLQNQGFEVVLPDKAMMDHVVNPAIEAFERKDMEGASNLLRIALQALLVRAVNTVIIASEEMLGLLPQGDPLLSKCTNPIDALVRSTIQWAVKAEDGKD	66.406	1e-117	XP_010921243.1	PREDICTED: uncharacterized protein LOC105044857 [Elaeis guineensis]	-	-	-	-	-	-	-	-	-	-	-	-	GO:0006520//cellular amino acid metabolic process	GO:0036361//racemase activity, acting on amino acids and derivatives	-
2692	PB.67503.1|m.49012	type:confident-5partial len:287 strand:+ pos:3-863	30892.7	0.304	5	14	-	0.93	0.752|0.938|1.104	0.176	15|15|14	0.015|0.913|0.462	GSKCPDSSSGDYDNGGNNKTDISKSASQIILLSSSFSPSPPKLFTTSFLAPHPLLRMECFRTRGSIEKNKALVEQLRHYGVFKSEKVAEVMETIDRGLFVTEGNPPYLDSPMSIGYNATISAPHMHASCLELLEEHLQPGMRALDVGSGSGYLTACFAMMVGPHGRAVGVEHIPELVVASIENIKRSAASELLKNGSLSIHVADGRLGWPDLAPYDAIHVGAASPEIPEPLIEQLKAGGRMVIPVGSFFQDLKVVDKKLDGSTTVRTVTSVRYVPLTSRAAQLQGD	84.188	3e-144	XP_020246782.1	protein-L-isoaspartate O-methyltransferase-like [Asparagus officinalis]	76.75	8e-131	sp|Q43209|PIMT_WHEAT	Protein-L-isoaspartate O-methyltransferase OS=Triticum aestivum GN=PCM PE=1 SV=1	Hs4885539	209	6e-67	KOG1661	Protein-L-isoaspartate(D-aspartate) O-methyltransferase	O	Posttranslational modification, protein turnover, chaperones	K00573|1|6e-145|412|aof:109824565|protein-L-isoaspartate(D-aspartate) O-methyltransferase [EC:2.1.1.77]		GO:0004719//protein-L-isoaspartate (D-aspartate) O-methyltransferase activity	-
2696	PB.42401.2|m.18578	type:likely-NA len:495 strand:+ pos:90-1574	56490.3	0.366	14	22	PB.42401.4|m.105870	0.89	0.932|0.816|0.919	0.064	20|22|17	0.226|0.043|0.068	MSQDLEMKDAQPPPPTTTTTAADAAPPSVTILQNLKEIALLIETGAYGKEVRRIVRAVRLTILLRRKLTAPIVAAFLTYALAQSCPEAHSRLASYLVKEDENDMDVEMVTSAGQVPVSAKHAVPELEIYCYLLGLIFLIDQKRYNEAKACSSYGIARLKNMNRRTVDVLASRLYFYYSYSYELTNSLAEIRGNLLSLHRMATLRRDELGQETLLNLLLRNYLHYNLYDQAEKLRSKAPRFEAHSNQQFCRYLFYLGKIRTIQLEYTDAKDSLLQAARKAPIAARGFRIQCNKWAVIVRLLLGEIPERTVFMQKGMKKALTPYFELTNAVRIGNLVEFTEVTKKFSAIFHSDGTHNMIVRLRHNVIRTGLRNISISYSRISLSDIARKLSLDSVADAESI…	81.087	0	XP_010920092.1	PREDICTED: probable 26S proteasome non-ATPase regulatory subunit 3 [Elaeis guineensis]	78.27	0	sp|Q06364|PSMD3_DAUCA	Probable 26S proteasome non-ATPase regulatory subunit 3 OS=Daucus carota GN=21D7 PE=1 SV=2	At1g20200	723	0	KOG2581	26S proteasome regulatory complex, subunit RPN3/PSMD3	O	Posttranslational modification, protein turnover, chaperones	K03033|1|0.0|787|egu:105044019|26S proteasome regulatory subunit N3	GO:0042176//regulation of protein catabolic process	GO:0030234//enzyme regulator activity	GO:0000502//proteasome complex
2800	PB.25615.2|m.150889	type:suspicious-NA len:469 strand:+ pos:175-1581	53592.7	0.013	1	1	-	0.96	0.100|2.524|0.256	1.357	1|1|1	0.020|0.366|0.201	MDSDDKVFTKAFGSNASSSAISTPVENGGINENAKSQSLHEFIKSYPKKELRASLDKERKQYSSSKLKTTEEAAKTTLRGCKNLELRKHSSNYSSSINNQAPRKQPRKGENPVRLPSAEDITDLRCASTWICKNSACKAVLSLEDNFCKRCSCCICHRFDDNKDPSLWLVCTSESGGGDWCGLSCHIECALEQQKAGVADCGQFIKLDGNYCCPSCGKVSGILGSWKKQLTTAKDARRVDVLCYRVSLSYRLLDGTSRFKELHDVVVDLKAKLEAEVGSVDGVSAKMARGIVSRLSVASDVNRLCSLAIEKADEWLKSAYNSDIQRDSLPAACRFQFEEITSSSLVIVLKESYSSTSDSIKGYKLWYYRTREEPCKKEAVIISRTERRILISNLQPCTE…	74.888	0	XP_010933821.1	PREDICTED: VIN3-like protein 1 isoform X2 [Elaeis guineensis]	56.41	5e-118	sp|Q9LHF5|VIL1_ARATH	VIN3-like protein 1 OS=Arabidopsis thaliana GN=VIL1 PE=1 SV=1	-	-	-	-	-	-	-	-	-	-	-
2806	PB.58772.3|m.205851	type:confident-5partial len:295 strand:+ pos:2-886	32461.5	0.429	2	6	-	0.77	0.607|0.707|1.007	0.208	6|6|5	0.022|0.119|0.976	GEEREMAAPVVDAEYLKEIEKVRRDLRALISSKNCAPIMLRLAWHDAGTYDVNTKTGGPNGSIRFEEEYSHAANAGLKIAIDLLEPIKENHPKITYADLYQLAGVVAVEITGGPTIDFVPGRRDSSVCATEGRLPDASKGPQHLRDVFYRMGLSDKDIVALSGGHTLGRAHPERSGFEGAWTKEPLKFDNSYFVEVLKEESEGLLKLPTDKALVEDPVFRCYVELYAKDEDAFFRDYAESHKKLSELGFTPPRSGSSSKCDVKSGAVLAQSAFGVAVAAAVVALSFLYEISKRK	88.194	0	XP_020273545.1	probable L-ascorbate peroxidase 4 [Asparagus officinalis]	82.01	3e-168	sp|Q6ZJJ1|APX4_ORYSJ	Probable L-ascorbate peroxidase 4, peroxisomal OS=Oryza sativa subsp. japonica GN=APX4 PE=2 SV=1	-	-	-	-	-	-	-	K00434|1|0.0|513|aof:109848456|L-ascorbate peroxidase [EC:1.11.1.11]	GO:0042744//hydrogen peroxide catabolic process;GO:0006979//response to oxidative stress;GO:0034599//cellular response to oxidative stress;GO:0000302//response to reactive oxygen species	GO:0020037//heme binding;GO:0004130//cytochrome-c peroxidase activity;GO:0004601//peroxidase activity	GO:0016021//integral component of membrane;GO:0009507//chloroplast
2827	PB.19452.14|m.61143	type:suspicious-NA len:180 strand:+ pos:71-610	19496	0.453	1	1	-	0.92	0.987|0.800|0.983	0.107	24|25|25	0.928|0.043|0.922	MATSGKKIKIGINGFGRIGRLVARVALQSPDVELVAVNDPFITTDYMTYMFKYDSVHGKWKHHEITVKDSKTLLFGEKAVTVFGFRNPEEIPWGETGADYVVESTGVFTDKDKAAAHLKGGAKKVIISAPSKDAPMFVVGVNEKSYTSDIDVLSNASCTTNCLAPLAKVINDHFGIVEG	93.296	7e-121	AIX10973.1	glyceraldehyde-3-phosphate dehydrogenase [Ornithogalum longebracteatum]	90.86	5e-116	sp|P26518|G3PC_MAGLI	Glyceraldehyde-3-phosphate dehydrogenase, cytosolic OS=Magnolia liliiflora GN=GAPC PE=2 SV=1	At1g13440	324	2e-112	KOG0657	Glyceraldehyde 3-phosphate dehydrogenase	G	Carbohydrate transport and metabolism	K00134|1|1e-117|340|aof:109836660|glyceraldehyde 3-phosphate dehydrogenase [EC:1.2.1.12]	GO:0006006//glucose metabolic process	GO:0051287//NAD binding;GO:0016620//oxidoreductase activity, acting on the aldehyde or oxo group of donors, NAD or NADP as acceptor;GO:0050661//NADP binding	-
2853	PB.56187.1|m.75410	type:suspicious-NA len:230 strand:+ pos:374-1063	25043	0.131	1	2	-	0.81	0.398|0.654|1.366	0.502	2|2|2	0.040|0.302|0.398	MPTLIGPLPPQLTKLKKLKYLSVTDTKISGPIPSFLSQLPSLRQINLYNNKLVGTIPPNLVSLNTMILYGNQLEGAIPGSLFSELKPGSGTAFLEVSSNKLTGTIPPSFANVQFDGISVSNNELTGDPSFLFGKSKQASEIIISYNKFEFDLTNVEYSEKNLQYVDISSNKIYGSISSQITQVTQLNTFIASDNKLCGKIPSGGSFPLFPAEYFIHNKCLCGTPLPACK	56.466	4e-80	XP_020250456.1	polygalacturonase inhibitor-like [Asparagus officinalis]	43.04	2e-56	sp|P58823|PGIP3_PHAVU	Polygalacturonase inhibitor 3 OS=Phaseolus vulgaris GN=PGIP3 PE=1 SV=1	At5g12940	112	7e-29	KOG0619	FOG: Leucine rich repeat	R	General function prediction only	K01188|1|1e-40|150|sbi:8073572|beta-glucosidase [EC:3.2.1.21]!K20718|3|2e-27|114|oeu:111405573|LRR receptor-like serine/threonine-protein kinase ERECTA [EC:2.7.11.1]	-	-	-
2870	PB.56859.2|m.58942	type:confident-5partial len:300 strand:+ pos:3-902	33774.9	0.575	8	421	-	0.85	0.584|0.930|1.037	0.237	419|408|409	0.007|0.030|0.210	TLLITTREEITCKKEKKMKIAVLAILILASISATFAAQCGREANGAICPNDLCCSKWGYCGSTEAYCSEGCQSQCGSVGRAKEGVSAVISSSQFNEMLLHRDNEFCPARGFYTYDAFVDAANSFPGFAAVGDMDNQKRVVAAFLAQSSHYTTGGWPDAPDGEFAWGFCYFLEQAFPHNHKNSPAREVPTNATLSFEKAISVWMTERPPKPSCHDVMSGMWMPTITDISQGRLPGFGLTINIMNGREECGHGEDYRANNRIGFYKRFCDILGVSYGENLDCNNQTPFGDRGRSAWNIFKQ	96.809	0	ACC68684.1	chitinase [Crocus sativus]	47.17	2e-97	sp|Q9FRV1|CHIA_SECCE	Basic endochitinase A OS=Secale cereale GN=rsca PE=1 SV=1	At3g12500	268	9e-89	KOG4742	Predicted chitinase	R	General function prediction only	K20547|1|8e-106|314|egu:105059691|basic endochitinase B [EC:3.2.1.14]	-	-	-
2881	PB.38385.17|m.198491	type:suspicious-NA len:243 strand:+ pos:43-771	27144.7	0.095	2	11	PB.38385.15|m.187117;PB.38385.13|m.74639;PB.38385.22|m.210233;PB.38385.5|m.48305;PB.38385.30|m.213733;PB.38385.14|m.110753	0.91	0.848|0.769|1.100	0.173	10|11|11	0.011|0.030|0.417	MPNLPPRVTAFQSRIALGNRQEAWHPGTIKAAFAEFISTLIFVFAGQGSGMAFAKLTNSGVTTPEGLIVAALAHAFGLFVAGLHSRQHLRGPREPRGDLRRVPRRKHHLLPRPGLHRRPAPRLHGGVLPPPLLHRRARHGLLRPLRRERVGGARARDRDDVRARLHGLRHRLGPQEGGSGHDCADRDRFHCRREYSRRRGVQGRVDEPGRVVRSVAGELVVGEPLGLLGGSSRRRWPRRNCL	85.185	2e-40	AFU51578.1	aquaporin [Gladiolus hybrid cultivar]	68.12	8e-23	sp|Q41963|TIP12_ARATH	Aquaporin TIP1-2 OS=Arabidopsis thaliana GN=TIP1-2 PE=1 SV=2	At3g26520	93.6	2e-22	KOG0223	Aquaporin (major intrinsic protein family)	G	Carbohydrate transport and metabolism	K09873|1|5e-27|108|pda:103715387|aquaporin TIP	-	-	-
2966	PB.17182.20|m.162522	type:suspicious-NA len:791 strand:+ pos:3-2375	90601.9	0.308	14	25	PB.21007.2|m.21727	0.87	0.787|0.870|0.962	0.088	25|23|25	0.007|0.095|0.701	SYETDASLSVAATGKVLIPGGPNDSSSSPTESIGNQEVDASDQQVMQKTGGLPVEDEKIESVQASVSSESMSQETMTKGAEKSDKSLPTESPEMFKKAEGAIPPPGNGQRIYEIDPLLRNHRSHLDYRYSQYKNMRKMIDKCEGGLDVFSRGYEKFGFNRSKNGITYREWAPGAKSASLIGDFNNWNPNADVMTRNEFGVWEIFLPNNSDGSSPIPHGSHVKIRMDTPSGIKDSIPAWIKFSVQAQGEIPYNGIYYDPPEEERYVFQHPQPKAPKSLRIYESHVGMSSTEPKINTYASFRDDVLPRIKKLGYNAVQIMAIQEHAYYASFGYHVTNFFAPSSRFGTPDELKSLIDKAHELGLLVLMDIVHSHASNNVLDGLNQFDGTDTHYFHEGLRGYH…	82.197	0	XP_010940323.1	PREDICTED: 1,4-alpha-glucan-branching enzyme 1, chloroplastic/amyloplastic isoform X1 [Elaeis guineensis]	76.91	0	sp|Q41058|GLGB1_PEA	1,4-alpha-glucan-branching enzyme 1, chloroplastic/amyloplastic OS=Pisum sativum GN=SBEI PE=1 SV=1	At5g03650	1236	0	KOG0470	1,4-alpha-glucan branching enzyme/starch branching enzyme II	G	Carbohydrate transport and metabolism	K00700|1|0.0|1376|egu:105058934|1,4-alpha-glucan branching enzyme [EC:2.4.1.18]	-	-	-
3014	PB.592.4|m.169258	type:confident-5partial len:1364 strand:+ pos:2-4093	155579	0.15	7	18	-	0.93	0.571|1.260|0.945	0.345	17|16|18	0.007|0.030|0.760	RVRAKYSSFAIQREEPGIRDKFTTSLRLSGAQLKQQLLAQKDQAVHFVERRIEGTKKFVANQSMSLIKMCLPRLADIVNVLTVITLLNAILAFMLDHIKRFNEARRIAQEKKEKQHLRELNTLYNKYWDDERPTYLEFKSDVIEKLPHTLATFEKYYFEDDKYTFQAKPNDMVALEKIVAVTALILMIFDAERSDCVYKVLNKLKGILSTTTQDAYRFQSLDNSKTLLEDKEMTIDFEINEGEVKAFSGTQTTFSEWWDNQLQNGNVITHYRTEGQFMEFTRANAQPVANEIAHNDAQDILVRGAVGSGKSTGLPFYLSNKGKVLMIESTRPLAENVFKQLKSEPFYASPTLRMRGTTSYGASPITIMTSGYALHYYANNPAMMKEYKFVIIDECHVHD…	64.659	8e-111	ACK58632.1	coat protein [Carica papaya]	23.01	1e-08	sp|Q93Y16|DEAH4_ARATH	Probable pre-mRNA-splicing factor ATP-dependent RNA helicase DEAH4 OS=Arabidopsis thaliana GN=At1g27900 PE=1 SV=1	YER013w	70.1	2e-11	KOG0922	DEAH-box RNA helicase	A	RNA processing and modification	K12818|1|1e-10|71.2|dosa:Os11t0310800-01|ATP-dependent RNA helicase DHX8/PRP22 [EC:3.6.4.13]!K12813|4|2e-10|70.9|gsl:Gasu_34140|pre-mRNA-splicing factor ATP-dependent RNA helicase DHX16 [EC:3.6.4.13]!K13117|5|3e-10|69.7|ini:109171195|ATP-dependent RNA helicase DDX35 [EC:3.6.4.13]	GO:0006396//RNA processing	GO:0004004//ATP-dependent RNA helicase activity;GO:0005524//ATP binding;GO:0003723//RNA binding	GO:0005737//cytoplasm;GO:0005730//nucleolus
3018	PB.4836.5|m.7441	type:confident-complete len:404 strand:+ pos:48-1259	44386	0.39	1	3	PB.4836.32|m.91869;PB.4836.19|m.63157	0.78	1.156|0.597|0.585	0.326	3|3|3	0.577|0.069|0.037	MAAARPLVSVQALDGDMVDGTTSVPLPDVLKAPIRPDVVRFVHANISKNKRQPYAVSRKAGHQTSAESWGTGRAVSRIPRVPGGGTHRAGQGAFGNMCRGGRMFAPTKIWRRWHRRVNVNQRRFAVVSALAASAVPSLVLARGHRIESVPELPLVVSDSIESVEKTSAAIKILKQIGALPDAEKAKDSTAIRTGKGKMRNRRYVSRKGPLIVYGTEGSKIVKAFRNIPGVDVANVDRLNLLKLAPGGHLGRFIVWTKSAFEKLDEVFGTFEKSSEKKKGYVLPRPKMGNADLGRIINSDEVQSVVRPITKDVKRRTQKKNPLTNLNAMLKLNPYAKTARRMSLLAEAQRVKAKAEKLDKKRTKVPKEEAAAIKAAGKAWYKTMITDSDYAEFDNFTKWL…	84.119	0	XP_002274975.1	PREDICTED: 60S ribosomal protein L4 [Vitis vinifera]	80.4	0	sp|Q9SF40|RL4A_ARATH	60S ribosomal protein L4-1 OS=Arabidopsis thaliana GN=RPL4A PE=1 SV=1	At3g09630	666	0	KOG1475	Ribosomal protein RPL1/RPL2/RL4L4	A	RNA processing and modification	K02930|1|0.0|697|cmax:111481914|large subunit ribosomal protein L4e	GO:0002181//cytoplasmic translation;GO:0006412//translation	GO:0003735//structural constituent of ribosome;GO:0003723//RNA binding	GO:0005840//ribosome;GO:0022625//cytosolic large ribosomal subunit
3125	PB.55087.1|m.30289	type:confident-5partial len:254 strand:+ pos:1-762	27550.4	0.83	13	427	-	0.93	0.727|1.007|1.058	0.178	409|411|398	0.007|0.959|0.033	RPKDAEGAEARSMWGREGKENFQAPASIDWRQKGAVTSVKNQGACGCCWAFGATGAIEGINAITTGRLISVSEQQIVDCDTSGSGCQGGDANDAFRWVISNGGIASDADYPYTGIKGTCKLDKPIAARIDGYTDVPNRESALLDAVAKQPVSVLIYTKSVEFQLYTGPGIFEGTTCKDDPATVDHTVLIVGYGSNGVNADYWIVKNSWGTQWGINGYILIRRNTNRPNGVCAINAWGSYPTKKVSHFGEESWA	58.228	6e-90	AAO18731.1	cysteine protease [Gossypium hirsutum]	50.22	2e-72	sp|Q9LM66|XCP2_ARATH	Cysteine protease XCP2 OS=Arabidopsis thaliana GN=XCP2 PE=1 SV=2	At1g09850_1	231	2e-74	KOG1543	Cysteine proteinase Cathepsin L	O	Posttranslational modification, protein turnover, chaperones	K16290|1|4e-80|249|nnu:104609778|xylem cysteine proteinase [EC:3.4.22.-]		GO:0008234//cysteine-type peptidase activity	-
3273	PB.42784.4|m.70714	type:confident-5partial len:462 strand:+ pos:2-1387	51077	0.538	18	42	PB.42784.1|m.2504	0.79	0.719|0.881|0.759	0.084	40|41|39	0.007|0.182|0.033	FGRDPVLVSPKAVSDSRNSQTCLDPDASQSVLGIILGGGAGTRLYPLTKKRAKPAVPLGANYRLIDIPVSNCLNSNISKIYVLTQFNSASLNRHISRAYGSNMGGYKNEGFVEVLAAQQSPENPNWFQGTADAVRQYLWLFEEHNVMEYIVLAGDHLYRMDYERFVQAHRETDADITVAALPMDEKRATAFGLMKIDEEGRIVEFAEKPKGDQLKAMKVDTTILGLDDERAKEMPYIASMGIYVISKDVMLQLLRDKFPGANDFGSEVIPGATDIGLRVQAYLFDGYWEDIGTIEAFYNANLGITKKPIPDFSFYDRSSPIYTQPRYLPPSKMLDADVTDSVIGEGCVIKNCKIHHSVVGLRSCISEGAIIEDTLLMGADYYETDADKRFLAAKGSIPI…	97.821	0	AHN15416.1	AGPS1 [Gladiolus hybrid cultivar]	92.37	0	sp|Q9M462|GLGS_BRANA	Glucose-1-phosphate adenylyltransferase small subunit, chloroplastic OS=Brassica napus GN=AGPS1 PE=2 SV=1	At5g48300	874	0	KOG1322	GDP-mannose pyrophosphorylase/mannose-1-phosphate guanylyltransferase	M	Cell wall/membrane/envelope biogenesis	K00975|1|0.0|897|aof:109848547|glucose-1-phosphate adenylyltransferase [EC:2.7.7.27]	GO:0019252//starch biosynthetic process;GO:0005978//glycogen biosynthetic process	GO:0008878//glucose-1-phosphate adenylyltransferase activity;GO:0005524//ATP binding	GO:0009507//chloroplast
3359	PB.44789.2|m.89638	type:suspicious-NA len:439 strand:+ pos:3-1319	50813.9	0.295	4	10	-	0.8	0.600|0.869|0.921	0.172	10|9|9	0.007|0.202|0.274	LISILLFISIIMSIQSSHFDMGKESSSFGDYLVIKPREGKLSDLFHLLYSGKVSERSSFESSEGMVIDDMTRRWVIFLSLLLQKILLLLEKPVALAGSFLEFWLNFLWENGNISSVVTKFFRGTLQIPNKNSKNYRSTIALLDTRDDLAINIKPGDSRYYAALSIMAAKLAYENEARIRSTVVDKWKMEFLGFFDCWNDYMDNSTTQAFMMSDKPIDTELVVVSFRGTEPTNMVDWCTDLDFSWYEIPKIGKVHGGFMKDLGLQKGTGWPKNIPPSKTRSVFAYYVIREKLREVLEKNEKAKFIVTGHSLGAALAVLFPIILAFHGEDWLLSRLEGVYTFGQPRVGDRKLGKFAEEHLDKPKRRYFRFVYCNDAVPRVPFDDSCLLFKHFGTCYYYDSL…	61.48	0	XP_009410097.1	PREDICTED: uncharacterized protein LOC103992206 [Musa acuminata subsp. malaccensis]	30.18	8e-09	sp|A2ZW16|PLA1_ORYSJ	Phospholipase A1-II 1 OS=Oryza sativa subsp. japonica GN=Os01g0651100 PE=3 SV=2	At5g67050	374	1e-125	KOG4569	Predicted lipase	I	Lipid transport and metabolism	K16818|1|8e-12|70.9|pper:18784683|phospholipase A1 [EC:3.1.1.32]	GO:0006629//lipid metabolic process	GO:0016787//hydrolase activity	-
3365	PB.55091.1|m.51904	type:confident-5partial len:416 strand:+ pos:2-1249	43996.3	0.212	7	11	-	0.92	0.836|0.821|1.097	0.155	10|9|11	0.187|0.030|0.579	CSQFHSKFIWSHSHYPSHSPISMAAAASSAVAPTTRPEPPHRIVICGGGIIGTCTAYFLSKKAPLSPNPTKITLVEKSSVACAASGKAGGFLALDWCDGGPVSSLARASFDLHRSLSQLLDGPNKYGYRPLNALSLPVPNPNPRKSTNYNLPSWIDGPTGPPKPIGTTATTAQVHPRLFTQTLIKNADGVDVVVGEASSVHVESGRVTGVVLRNGNFIPADSVVLALGPWSSRLPLISSLFAVSGLKAHSIVLRPADPESITPHALFLSYRDSPSANPTDPEIYPRPTGEVYVCGISRKAEVPDDPEDIVGDPEAIETLHEIAGTVSSHLRKDGGAETVAEQACFLPCTDDGLPVIGEMPGVGGCFVGTGHSCWGILNGPATGASLAELVLEGKSTTVD…	63.281	2e-171	XP_021654682.1	putative oxidoreductase TDA3 [Hevea brasiliensis]	-	-	-	-	At5g67290	441	2e-153	KOG2852	Possible oxidoreductase	R	General function prediction only	K00306|1|6e-08|58.9|sita:101776497|sarcosine oxidase / L-pipecolate oxidase [EC:1.5.3.1 1.5.3.7]		GO:0016491//oxidoreductase activity	GO:0005737//cytoplasm
3404	PB.4393.22|m.133454	type:confident-5partial len:811 strand:+ pos:1-2433	92404.5	0.384	5	10	PB.4393.23|m.141950;PB.4393.28|m.176964;PB.4393.25|m.151460	0.94	1.222|0.919|0.691	0.266	10|10|10	0.260|0.909|0.050	SLKLAHSARDSLSDTLSAHTNELLALFSRIIKQGKGMLQPHQLISEYEAVIPKADQEKLKDGFEDVLRASQEAIVLPPWVALAIRPRPGVWEFVRVNISELAVEELTVPEYLHFKEELSDGVSQENFVLELDFEPFNESLPRPSLSKSIGNGVQFLNRHLSSKLFQNKESMYPLLNFLRVHSYKGTTMMVNDRIQSLHALRSSLRKAEKHISALPQDTPYSEFTYRFQELGLEKGWGDTAARVHETIHLLLDLLEAPDPCTLEKFLGRVPMVFNVVILSPHGYFAQANVLGYPDTGGQVVYILDQVRALESEMLLRIKHQGLDITPRILIVTRLLPDAVGTTCGQHLEKVIGTDHTSILRVPFRTEKGILRKWISRFEVWPYLETYADDVANELARELQ…	96.078	0	AKP55627.1	SuSy protein [Gladiolus hybrid cultivar]	83.56	0	sp|Q41607|SUS2_TULGE	Sucrose synthase 2 OS=Tulipa gesneriana PE=2 SV=1	At3g43190	1258	0	KOG0853	Glycosyltransferase	M	Cell wall/membrane/envelope biogenesis	K00695|1|0.0|1468|egu:105058592|sucrose synthase [EC:2.4.1.13]	-	-	-
3567	PB.11075.4|m.155819	type:suspicious-NA len:920 strand:+ pos:17-2776	103975	0.033	1	1	-	0.57	0.700|0.880|0.129	0.392	1|1|1	0.666|0.951|0.050	MGAKAPRSTPLTPLPLPPRKESEPPSSSPSAPNPSTASGRHHHQPSPSLASTASSLSASPPPTKSIPPSTLPPPRGPHLRLRRLLPPIPEQPRAPSNYAISTSTAHTFGPSPTQTPPPLPPSARVHAPDVHHRVVLSAWLRFERREDEMTHSSPSLLSCSPTCPSSSAHAPPSHRTPAPPAHAIPPEPTPIDRSTISRRAEEEGDVWFCIGEDEVECVRHRIASLSKPLSTLLYGGFAESRREHINFTQNNISVKGMRALHEFSRTNSLSPFTPETVCELLCFANMFCCEGLKSSCDAKLASLVRSVDDAMLLVEFGLDEPAHLLVAACLQAFLRNLPRSLADPEITKILCSPEGTASLSAAGHASFALYYFLSQVAMEEDMRSNTTVMLLERLVECAS…	78.492	0	XP_020274917.1	ethylene-overproduction protein 1 [Asparagus officinalis]	66.96	0	sp|O65020|ETO1_ARATH	Ethylene-overproduction protein 1 OS=Arabidopsis thaliana GN=ETO1 PE=1 SV=2	At3g04240	52	4e-06	KOG4626	O-linked N-acetylglucosamine transferase OGT	GOT	Carbohydrate transport and metabolism;Posttranslational modification, protein turnover, chaperones;Signal transduction mechanisms	K09667|1|1e-06|57.8|pavi:110745037|protein O-GlcNAc transferase [EC:2.4.1.255]	-	-	-
3609	PB.34450.1|m.24905	type:suspicious-NA len:475 strand:+ pos:379-1803	53168.3	0.407	3	9	PB.33059.3|m.8901	0.86	0.800|0.818|0.962	0.089	17|16|17	0.007|0.097|0.849	MNIIYVGAEMGPWSKTGGLGDVLGGLPPAMAANGHRVMAISPRYDQYKDGWDTSVTAEIKVGDQLETVRFFHSYKRGVDRVFIDHPLFLEMVWGKTGEKLYGPITGTDYPDNQRRFSILSLAALEAPRILNLTNKSFSGPYGEDVVFVANDWHTALLPCYLKTIYKPNGIYKSAKVVYCIHNIAYQGRFAFSDFSLVNLPDRFKSSFDFIDGHNKPVKGRKINWMKAGILEADRVVTVSPYYAQELLSGEDKGVELDNILRMTGITGIVNGMDVQDWDPSKDKYIDANYDATTAVEGKALNKEALQAEVGLPVDKNIPVIVFIGRLEEQKGSDILAAAIPEFMDEDVQIIVLGTGKKKMEKELEVLETKYPDKARGIAKFNTALAHKMIAGADIVLIPS…	82.185	0	XP_020273624.1	granule-bound starch synthase 1b, chloroplastic/amyloplastic isoform X2 [Asparagus officinalis]	74.64	0	sp|Q43784|SSG1_MANES	Granule-bound starch synthase 1, chloroplastic/amyloplastic OS=Manihot esculenta GN=WAXY PE=2 SV=1	-	-	-	-	-	-	-	K13679|1|0.0|690|jre:108993773|granule-bound starch synthase [EC:2.4.1.242]	GO:0019252//starch biosynthetic process	GO:0004373//glycogen (starch) synthase activity	GO:0009501//amyloplast;GO:0009507//chloroplast
3709	PB.42470.2|m.97279	type:confident-complete len:520 strand:+ pos:39-1598	57134	0.297	6	14	-	0.68	0.547|0.786|0.706	0.122	13|12|14	0.007|0.069|0.033	MEVSTVSLVGNVSVVQARKGNVGSEGSGLWGKGLALGKSRVRSRCLGGGVKARVTNSVLTSDVGNETMIFQAPMFAKLQADPKSVASIILGGGPGTHLFPLTSTRATPAVPVGGCYKLIDIPMSNCFNSGINKIFIMTQFNSASLNRHISRTYNNLGNGVNFGDGFVEVLAATQTPGEAGMNWFQGTADAVRQFIWLFEDNRNKNIEHILILSGDPLYRMDYMDFLQKHIDTGADITVSCVPVDGRRASDYGLVKIDKSDRIIHFSEKPKDAALEAMKIDTTTLGLSRQEAIMNPYIASMGVYVFRRDVLLKLLGWSHPKANDFGSEILPSAVVDHNVQAYLFNDYWGDIGTIKSFFDANLALAHQVPKFHFYDPKTPFFTSPRFLPPTKMEKCRIVDA…	93.256	0	AIO11223.1	AGPL1 protein [Gladiolus hybrid cultivar]	67.24	0	sp|P55233|GLGL1_BETVU	Glucose-1-phosphate adenylyltransferase large subunit, chloroplastic/amyloplastic OS=Beta vulgaris GN=AGPS1 PE=2 SV=1	At1g27680	718	0	KOG1322	GDP-mannose pyrophosphorylase/mannose-1-phosphate guanylyltransferase	M	Cell wall/membrane/envelope biogenesis	K00975|1|0.0|835|pda:103714983|glucose-1-phosphate adenylyltransferase [EC:2.7.7.27]	-	-	-
3738	PB.689.1|m.36790	type:confident-5partial len:231 strand:+ pos:3-695	24945.6	0.157	3	6	PB.65774.1|m.60601;PB.65774.3|m.203610;PB.689.4|m.204595	0.86	0.900|0.730|0.950	0.115	5|5|6	0.445|0.030|0.874	IEDSMAVVAKIAPSMLSSDFANLASEAERMLKFGADWLHMDVMDGHFVQNLTIGAPVIESLRKHTKAYLDCHLMVTNPLDYVEPFSKAGASGFTFHVEVSKENWQELIQKIKAKGMRAGVALKPGTPIEEVYPLIESHDPVEMVLVMTVEPGFGGQKFMPETMDKVRALRKKFPALDIEVDGGLGPSTIDMAASAGANCIVAGSSVFGAAEPEKVISTLRKSVDTAQLNS	87.168	6e-147	XP_009383844.1	PREDICTED: ribulose-phosphate 3-epimerase, cytoplasmic isoform [Musa acuminata subsp. malaccensis]	82.35	2e-141	sp|Q9SE42|RPE1_ORYSJ	Ribulose-phosphate 3-epimerase, cytoplasmic isoform OS=Oryza sativa subsp. japonica GN=Os09g0505700 PE=1 SV=1	At1g63290	369	3e-131	KOG3111	D-ribulose-5-phosphate 3-epimerase	G	Carbohydrate transport and metabolism	K01783|1|5e-151|422|cmax:111488913|ribulose-phosphate 3-epimerase [EC:5.1.3.1]	GO:0019323//pentose catabolic process;GO:0005975//carbohydrate metabolic process;GO:0006098//pentose-phosphate shunt;GO:0009052//pentose-phosphate shunt, non-oxidative branch;GO:0044262//cellular carbohydrate metabolic process	GO:0004750//ribulose-phosphate 3-epimerase activity;GO:0046872//metal ion binding	GO:0005829//cytosol
3873	PB.11585.3|m.159774	type:likely-NA len:959 strand:+ pos:13-2889	107459	0.346	3	6	-	0.8	0.779|0.698|0.921	0.113	5|5|6	0.045|0.064|0.504	MPLLTCCPSFPPPRLLHRVNSHNLSPPPPPSSSTQIYPNASSLILPPLICSSRRQGRIIYPRSSMPGHVEDPTVENSLPQDCLSYARAYWVTRSLLAWNVSDDVVYLYASRKANLFLNDDGVQGQDMKIQLESKQCGLPRNVMQKFPHIANYKAFHIPDSVDVENLLKCQLAAVSLRADGKCKNATGLQIPGVLDDMFAYTGLLGAVFSKEVISLYLWAPTAHMVHVCVYKDPISVDPLDYVELKEQSGVWSAVGPRSWEGCYYVYEVSAYHPSTSRIETCIVNDPYARGLSSDGKRTLLVNLDCEKLKPEGWDELAFEKPDLHSFSDVSIYELHIRDFSANDHTVDPDIRGGYLAFTSQDSVGVSHLKKLSEVGLTHVHLLPCFQFAGVDDDRKKWKY…	77.133	0	XP_010918919.1	PREDICTED: pullulanase 1, chloroplastic isoform X1 [Elaeis guineensis]	67.72	0	sp|Q8GTR4|PULA1_ARATH	Pullulanase 1, chloroplastic OS=Arabidopsis thaliana GN=PU1 PE=1 SV=2	At5g04360	1260	0	KOG0470	1,4-alpha-glucan branching enzyme/starch branching enzyme II	G	Carbohydrate transport and metabolism	K01214|1|3e-28|127|pxb:103962304|isoamylase [EC:3.2.1.68]	GO:0005975//carbohydrate metabolic process;GO:0005983//starch catabolic process;GO:0019252//starch biosynthetic process	GO:0051060//pullulanase activity;GO:0010303//limit dextrinase activity	GO:0009570//chloroplast stroma
4053	PB.49033.3|m.16904	type:confident-5partial len:366 strand:+ pos:3-1100	40966.3	0.129	1	6	-	0.85	0.669|0.805|1.067	0.202	12|12|12	0.007|0.258|0.432	IKPNKTPHLLSSRIFRHPIFFIFFSPFLRLRQLHKIGGEKMATTSLLIFAPFTTANPNPNSNRCVKARSNVNVKCRCSFNSPSQSQSLLLRRIDSARSFGGRSGGIDLDSLLIPFAASHEESKHSDFEVEDKKNEFESETNEADEAWKQTLESFKEEAKKMKEVSQEAYEVYSKKAMVILKETSETLKIQAEKARLEMTAAAKEINKEGKVYLDTAAKNSPDSVKDIVETFVSSTDELKGISTVRDFYVGIPYGAFLAVGGFLSFMLTGSISAIRFGVILGCVLLALSVSSLRSWKSGQSSELFLKAQAAIVAVIFIREWRCFCQKRLLSTLLMTLISGSILVFYVYRIITDGKSKGPSSEQSSE	62.712	9e-115	XP_020243626.1	protein FATTY ACID EXPORT 3, chloroplastic [Asparagus officinalis]	47.95	3e-87	sp|Q9ZVH7|FAX3_ARATH	Protein FATTY ACID EXPORT 3, chloroplastic OS=Arabidopsis thaliana GN=FAX3 PE=2 SV=2	At3g57280	77	7e-16	KOG4267	Predicted membrane protein	S	Function unknown	-			GO:0016021//integral component of membrane
4110	PB.74995.1|m.182587	type:likely-NA len:94 strand:+ pos:1-282	10289.4	0.398	2	5	PB.74724.1|m.178605;PB.74706.1|m.184796;PB.55158.1|m.58643	0.91	0.816|1.177|0.743	0.232	4|5|5	0.226|0.829|0.037	IVIRGEEQIHMARAKAKEIVSSNPVVVFSKSYCPYCVRVKKLLTGLGVTFKAIELDVETDGSETQAALAEWTGQRTVPMFLSAEIISVVVTML	85.294	2e-36	XP_004491729.1	PREDICTED: glutaredoxin-C2 [Cicer arietinum]	77.94	7e-35	sp|Q9ZR41|GLRX_SOLLC	Glutaredoxin OS=Solanum lycopersicum PE=3 SV=1	At5g40370	109	2e-32	KOG1752	Glutaredoxin and related proteins	O	Posttranslational modification, protein turnover, chaperones	K03676|1|4e-37|124|cam:101502199|glutaredoxin 3	GO:0045454//cell redox homeostasis	GO:0015035//protein disulfide oxidoreductase activity;GO:0009055//electron transfer activity	GO:0005794//Golgi apparatus;GO:0005773//vacuole;GO:0005829//cytosol;GO:0005623//cell;GO:0048046//apoplast;GO:0005886//plasma membrane
4252	PB.23022.16|m.151042	type:confident-5partial len:809 strand:+ pos:1-2427	92193.4	0.608	8	62	PB.23022.17|m.155489;PB.23022.15|m.132720	0.9	0.755|0.960|0.991	0.128	59|61|60	0.007|0.829|0.959	IAYHSKYSPHFSPLKFDPEQAFYATAESVRDHLIENWNETYSHFHNVDPKQTYYLSMEYLQGRTLTNAIGNLGIRDAYADALSKLGHELEEISEQEKDAALGNGGLGRLASCFLDSMATLNLPAWGYGLRYRYGLFKQRISKEGQEELADDWLEKFSPWEVVRHDVVFPVRFFGHVEISSTGSRKWVGGETIQALAYDVPIPGYKTKNTISLRLWEAKARAEDFNLFQFNDGQYESAAQLHSKAQQICAVLYPGDATENGKILRLKQQFFLCSASLQDIICRFKERRNEGAWAWSDFPNKVAVQLNDTHPTLSIPELMRLLMDDEALGWDEAWDVTTRTIAYTNHTVLPEALEKWSQATMAKLLPRHMEIIEEIDKRFMAMIKSTRTDMESKLATMQIL…	89.122	0	XP_020243703.1	alpha-glucan phosphorylase, H isozyme [Asparagus officinalis]	81.83	0	sp|Q9LKJ3|PHSH_WHEAT	Alpha-glucan phosphorylase, H isozyme OS=Triticum aestivum PE=2 SV=1	At3g46970	1426	0	KOG2099	Glycogen phosphorylase	G	Carbohydrate transport and metabolism	K00688|1|0.0|1537|aof:109821959|glycogen phosphorylase [EC:2.4.1.1]	GO:0005975//carbohydrate metabolic process;GO:0009414//response to water deprivation;GO:0046686//response to cadmium ion	GO:0102499//SHG alpha-glucan phosphorylase activity;GO:0102250//linear malto-oligosaccharide phosphorylase activity;GO:0030170//pyridoxal phosphate binding;GO:0008184//glycogen phosphorylase activity	GO:0005829//cytosol;GO:0009507//chloroplast
4352	PB.70893.1|m.29749	type:confident-5partial len:202 strand:+ pos:3-608	21826.7	0.274	2	41	-	0.8	0.619|0.854|0.913	0.156	40|39|39	0.007|0.030|0.259	WTKKRERENGRFTLLLISIISVIPTHASSKSDDECVYTVFVRTGSVVKGGTDARIGLTLGDAAGKQIEIGDLESWGGLMGEGHDYFERGALDIFSGRGPCREDSAAPLCSLNVTSDGAGAHQGWFCEYVEVASTGPHVPCSQTLFYVRQWLADDAPPYQLYAAVDGCDQITPAEISAGKGCTSPFVVRGGRHRSAALASSI	65.896	2e-77	XP_009382437.2	PREDICTED: PLAT domain-containing protein 3-like [Musa acuminata subsp. malaccensis]	51.25	2e-50	sp|Q9SIE7|PLAT2_ARATH	PLAT domain-containing protein 2 OS=Arabidopsis thaliana GN=PLAT2 PE=2 SV=1	-	-	-	-	-	-	-	-	-	-	-
4405	PB.72802.3|m.203338	type:confident-5partial len:210 strand:+ pos:1-630	22499.9	0.263	1	55	-	0.81	0.664|0.880|0.875	0.123	54|53|55	0.007|0.139|0.033	QQQPVSIVKEREREKMGRVTLLLILIISVISTHASSKSDDECVYTVFVRTGSVLKGGTDARIGLILGDAAGKQVEIDDLESWGGLMGEGHDYFERGALDIFSGRGPCRENSASPFCSLNVTSNGAGAHHGWFCESVEVASSGPHMPCSQTLFYVKQWLANDAPPYQLYAAVDSCDQMTPADVSAGKGCSSPFVVGGGRDLSAASLASVV	62.857	6e-75	XP_009382437.2	PREDICTED: PLAT domain-containing protein 3-like [Musa acuminata subsp. malaccensis]	50	5e-51	sp|Q9SIE7|PLAT2_ARATH	PLAT domain-containing protein 2 OS=Arabidopsis thaliana GN=PLAT2 PE=2 SV=1	-	-	-	-	-	-	-	-	-	-	-
4578	PB.11021.13|m.186186	type:confident-5partial len:268 strand:+ pos:1-804	30033.1	0.419	8	11	PB.11021.4|m.45446;PB.11021.3|m.37638;PB.11021.9|m.88950;PB.11021.1|m.13214;PB.11021.10|m.92595;PB.11021.7|m.74651	0.88	0.810|0.873|0.968	0.08	11|10|10	0.018|0.422|0.925	NDKEVHYFLTPLSRLLVKNEGAKLSKFVTGVLHPIIVGTFQSMSSWLKDDEETAFPLVHGCSAWEMAGRNPEYNKAFNEAMASDAQFLMKVVVEDCGQVFRGITSLVDVGGGTGSSARAISVAFPEIKCSVLDLPQVVEAVHDKGTVDFVAGDMFNHIPPASAILLKWILHDWNDEECVRILKRCKEAIPSREEGGKVIIIDMVVRPESSHKKTTESQLYFDVVMMVLHGGAEREEREWEKIFKEAGFSDYNIVHTLGVRSVIEVYP	60.075	9e-117	XP_020265132.1	trans-resveratrol di-O-methyltransferase-like [Asparagus officinalis]	52.11	8e-99	sp|B6VJS4|ROMT_VITVI	Trans-resveratrol di-O-methyltransferase OS=Vitis vinifera GN=ROMT PE=1 SV=2	At1g51990	159	2e-46	KOG3178	Hydroxyindole-O-methyltransferase and related SAM-dependent methyltransferases	R	General function prediction only	K16040|1|5e-101|302|sot:102602143|trans-resveratrol di-O-methyltransferase [EC:2.1.1.240]		GO:0046983//protein dimerization activity;GO:0008171//O-methyltransferase activity	-
4613	PB.59884.6|m.205148	type:confident-5partial len:203 strand:+ pos:2-610	22226.2	0.604	9	21	PB.59844.1|m.31621;PB.59884.1|m.45568;PB.59884.5|m.192164;PB.68517.1|m.29330	0.92	0.791|0.917|1.066	0.138	20|19|21	0.007|0.513|0.568	KYIIIGDTGVGKSCLLLQFTDKRFQPVHDLTIGVEFGARMITIENKPIKLQIWDTAGQESFRSITRSYYRGAAGALLVYDITRRETFNHLASWLEDARQHANANMTIMLIGNKSDLAHRRAVSTEEGEQFAKEHGLVFMEASAKTAQNVEEAFISTAATIYKKIQDGVFDVSNESYGIKVGYGGIPGRSGGPVSSQGGGCCS	95.098	2e-142	XP_006373561.1	hypothetical protein POPTR_0016s00400g [Populus trichocarpa]	95.07	4e-143	sp|P92963|RAB1C_ARATH	Ras-related protein RABB1c OS=Arabidopsis thaliana GN=RABB1C PE=1 SV=1	At4g17170	397	8e-143	KOG0098	GTPase Rab2, small G protein superfamily	U	Intracellular trafficking, secretion, and vesicular transport	K07877|1|3e-143|401|pop:18105986|Ras-related protein Rab-2A		GO:0005525//GTP binding;GO:0003924//GTPase activity	GO:0000139//Golgi membrane
4646	PB.73599.1|m.179618	type:likely-NA len:193 strand:+ pos:31-609	21828.6	0.224	4	23	-	0.93	0.792|1.034|0.959	0.124	23|23|23	0.007|0.947|0.846	MDRYLSIFVLLFVLSLAYAEPHPKEFKSFKIGEVAKIQIYQEKQVGVGGRGCSYTVKIKTSCSKSPRYTRDAISIAFGDAYGNEVYVGRLDDYRSGTFERCSTDTFDMQGPCGYGVCYLYLYRQGRDGWVPESVKIYEVSYSRAVTFYYGGNIPTNVWYGFNQCTGVSANSDKAIEIATDATELGHDSTSQI	56.897	2e-63	XP_020251318.1	embryo-specific protein ATS3B-like [Asparagus officinalis]	54.49	2e-50	sp|Q681K2|ATS3A_ARATH	Embryo-specific protein ATS3A OS=Arabidopsis thaliana GN=ATS3A PE=1 SV=1	-	-	-	-	-	-	-	-	-	-	-
4708	PB.68957.1|m.21748	type:confident-complete len:209 strand:+ pos:80-706	22459.8	0.154	2	3	-	0.9	0.665|0.844|1.183	0.263	3|3|3	0.030|0.648|0.470	MDSYWKSKVLPKLKKVFETNKNGAKKAAAAEANKAFDDSKVEIDKEFEEKKTELQPKVLEIYEAAPAKIKSLVKERKEAGVKKNSAAVTNFLEELAKIDFPGAKKVSEIVTSYGAALVPVPVLYILDKVSTLLPVEETPDTVTAAAAAPEEKKTAVQESSGSKDREVVVAAEEEKKQAEAEEMAAPEASATEEAAELDKPAEEEAPKA	62.874	1e-58	XP_020688760.1	plasma membrane-associated cation-binding protein 1-like [Dendrobium catenatum]	54.55	1e-42	sp|Q96262|PCAP1_ARATH	Plasma membrane-associated cation-binding protein 1 OS=Arabidopsis thaliana GN=PCAP1 PE=1 SV=1	-	-	-	-	-	-	-	-	GO:0051716//cellular response to stimulus		GO:0046658//anchored component of plasma membrane
4801	PB.70306.1|m.191564	type:confident-5partial len:279 strand:+ pos:3-839	31196.7	0.612	13	97	-	0.99	0.817|1.036|1.127	0.159	104|110|108	0.007|0.732|0.033	ATWLFPQLSPIITLGLPKAVEEILLRTFPVPSWIVRSDYKALRSYFTSVAAGPVLEDAEKLGLSKEAAINNLLFATTFNSYGGMKVFFPIILKWLSLAGPKLHARLVEEIRPVVEEEGGKITVSALEKLELTRSVVYEALRMNPPVEFQYGKARADFVIESHDARYKIKKGEMLFGYQPFATRDEKVFKNGGEFVGDRFIGEKGKQLLKYVVWSNGPETESPTVDNKQCLGKNFVVLVGRLFVVHFFLRYDTFTAEVGEFLLGPKITVTSLAKATTKT	66.667	4e-129	XP_008778307.1	PREDICTED: allene oxide synthase 2-like [Phoenix dactylifera]	59.93	3e-115	sp|Q9LLB0|AOS2_SOLLC	Allene oxide synthase 2, chloroplastic OS=Solanum lycopersicum GN=AOS2 PE=1 SV=1	7302303	52.8	2e-07	KOG0158	Cytochrome P450 CYP3/CYP5/CYP6/CYP9 subfamilies	Q	Secondary metabolites biosynthesis, transport and catabolism	K01723|1|7e-130|381|pda:103698112|hydroperoxide dehydratase [EC:4.2.1.92]		GO:0004497//monooxygenase activity;GO:0016705//oxidoreductase activity, acting on paired donors, with incorporation or reduction of molecular oxygen;GO:0005506//iron ion binding;GO:0020037//heme binding	-
4803	PB.46661.1|m.6484	type:confident-5partial len:400 strand:+ pos:3-1202	43619.9	0.316	1	3	PB.46661.7|m.94478;PB.46661.3|m.14609	0.95	0.804|1.076|0.969	0.137	32|36|36	0.007|0.717|0.813	ATISPKQEKEKVDNGSSGYHVTGLPSFMRGTVFWEANRPLTIEEFHMPRPKSGEVLIKTKACGVCHSDLHLMKGHFPFASPCVVGHEITGEVVEHGANTDPGVIKRFPVGSHVVGAYIMPCGNCFFCVKGQEDICEEFFAHNRAHGTLYDGETRLFLRNSGKPVYMYSMGGLAEYCVIPSNALALLPESLPYSESAILGCAVFTAYGAMRNAAEMRAGDSVAVIGAGGVGSSCLQIARAFGASEVIAVDISDEKLDNARILGATHTINALKEDVPDKIKEITGGRGVDVAVDALGRPSTFTQCTHSIRPGGKAVMIGLSLNTDMGEIDINRLVRKQIKIIGSYGGRARQDLPQVVKLAERGVFNLKNMVSRKCKFEEANSTYADLENGKILGRAVIEIM	80.151	0	XP_008803674.1	PREDICTED: alcohol dehydrogenase [Phoenix dactylifera]	30.34	9e-44	sp|P06525|ADH1_ARATH	Alcohol dehydrogenase class-P OS=Arabidopsis thaliana GN=ADH1 PE=1 SV=2	At5g63620	582	0	KOG0022	Alcohol dehydrogenase, class III	Q	Secondary metabolites biosynthesis, transport and catabolism	K00121|1|5e-49|174|cme:CYME_CMS125C|S-(hydroxymethyl)glutathione dehydrogenase / alcohol dehydrogenase [EC:1.1.1.284 1.1.1.1]		GO:0050897//cobalt ion binding;GO:0008270//zinc ion binding;GO:0016491//oxidoreductase activity	-
4808	PB.43584.6|m.87387	type:confident-complete len:424 strand:+ pos:221-1492	47146	0.414	1	2	-	0.99	1.043|0.783|1.130	0.181	9|9|9	0.686|0.030|0.068	MSSSSFLPATTDSLAQALEAKDPSESISILYRILENPSSSPEALRIKEQAISNLSELLTQEKKAGELRSLLTQLRPFFSLIPKAKTAKIVRGIIDAVAKIPGTSDLQISLCKEMVEWTRAEKRTFLRQRVEARLAALLMESQEYSEALTLLSSLVKEVRRLDDKLLLVDIDLLESKLHFSLRNLPKAKAALTAARTAANAIYVPPAQQGTIDLQSGILHAEEKDYKTAYSYFFEAFEGFNALSDPRALFSLKYMLLCKIMVSQADDVAGIISSKAGLLYVGPDLDAMKAVADAHSKRSLKFFETALRDYKAQLEDDPIVHRHLSSLYDTLLEQNLCRLIEPYSRVEIAHVATMIELPLQHVEKKLSQMILDKKFAGTLDQGAGCLVIFDDPKVDAIFPA…	93.81	0	AIZ68139.1	26S proteasome non-ATPase regulatory subunit 11 [Ornithogalum saundersiae]	87.23	0	sp|Q9LP45|PSD11_ARATH	26S proteasome non-ATPase regulatory subunit 11 homolog OS=Arabidopsis thaliana GN=RPN6 PE=1 SV=1	At1g29150	712	0	KOG1463	26S proteasome regulatory complex, subunit RPN6/PSMD11	O	Posttranslational modification, protein turnover, chaperones	K03036|1|0.0|790|nnu:104586580|26S proteasome regulatory subunit N6			GO:0000502//proteasome complex
4885	PB.52694.2|m.74526	type:likely-NA len:258 strand:+ pos:2-775	29932.9	0.062	1	1	PB.52694.3|m.75489	0.41	0.192|0.862|0.180	0.39	1|1|1	0.043|0.917|0.068	GEREEREGFDFGMAFLVERCGEMVVSTDSQRSVPAPFLTKTYQLVDDHCTDHIVSWGEDDTTFVVWRPPEFARDLLPNYFKHNNFSSFVRQLNTYGFRKIVADRWEFANEFFRKGENHLLSEIHRRKTSQASQQHYHSPMGMEMSWADEPPLLPPARPSSDTNYLSALSEDNLRLRRKNSLLLSELTHMKKLYDDIIYFLQNHVSPIGTSTQPQFRKVFGPSSVTVTEEPAERNTVKLFGVPLSGKKRLHQEVELQE	70.312	2e-123	XP_020254681.1	heat stress transcription factor B-4b-like [Asparagus officinalis]	55.03	9e-94	sp|Q7XHZ0|HFB4B_ORYSJ	Heat stress transcription factor B-4b OS=Oryza sativa subsp. japonica GN=HSFB4B PE=1 SV=1	At1g46264	263	7e-87	KOG0627	Heat shock transcription factor	K	Transcription	K09419|1|3e-124|357|aof:109831708|heat shock transcription factor, other eukaryote		GO:0003700//DNA binding transcription factor activity;GO:0043565//sequence-specific DNA binding	GO:0005634//nucleus
5059	PB.33059.2|m.5150	type:confident-complete len:613 strand:+ pos:121-1959	67727.6	0.426	9	27	-	0.87	0.774|0.889|0.946	0.088	27|28|26	0.007|0.385|0.576	MAVVTASYNISKIVNAKYGGTFKSETRSFPNRKIRCLKSEAMAFHGLRSRNMVDLVRMRSNAKPSPRPAKRGTSHRPSAIVICGSGMNIIFVGAEMGPWSKTGGLGDVLGGLPPAMAAHGHRVMAIAPRYDQYKDGWDTSVTAEIKVGDKLETVRFFHSYKRGVDRVFIDHPLFLEMVWGKTGEKLYGPITGTDYPDNRQRFSILSLAALEAPRILNLTNKTFSGPYGEDVVFVANDWHTALLPCYLKTMYKPSGIYKTAKVVYCIHNIAYQGRFAFSDYSLLNLPDRFKSSFDFIDGHTKPVKGRKINWMKAGILEADRVVTVSPYYAQELLSGEDKGVELDNILRMTGITGIVNGMDVQDWDPSKDKYIDVNYDATTVLEGKALNKESLQAEVGLPV…	76.183	0	XP_020273624.1	granule-bound starch synthase 1b, chloroplastic/amyloplastic isoform X2 [Asparagus officinalis]	68.52	0	sp|O82627|SSG1_ANTMA	Granule-bound starch synthase 1, chloroplastic/amyloplastic OS=Antirrhinum majus GN=WAXY PE=2 SV=1	-	-	-	-	-	-	-	K13679|1|0.0|926|egu:105059288|granule-bound starch synthase [EC:2.4.1.242]	GO:0019252//starch biosynthetic process	GO:0004373//glycogen (starch) synthase activity	GO:0009501//amyloplast;GO:0009507//chloroplast
5130	PB.44172.3|m.31520	type:confident-5partial len:245 strand:+ pos:2-736	27641.4	0.594	11	21	PB.44172.6|m.72597;PB.44172.1|m.19714;PB.44172.2|m.22232	0.91	0.823|0.997|0.923	0.087	19|21|20	0.007|0.996|0.572	EFSKDIPATHVEATPLTKVINETEAKKETKKPAFVDVSREEVLQRDQEYSKESTTASSFNNVHSEKGVSPNGATFKLDVNASTEQPQTSQKSSGLSVEALEKMMEDPNMQKMVYPYLPEEMRNPTTFKWMLQNPEYRQQLQDLLNNMGGSGEWDNRMMDNMKNFDLSSPEVKQQFDQIGLTPEEVISKIMANPEVAMAFQNPRVQAAIMDCSQNPLSIAKYQNDKEVMDIFTKISELFPGVAGY	76.667	5e-127	XP_010930575.1	PREDICTED: protein TIC 40, chloroplastic [Elaeis guineensis]	67.49	1e-111	sp|Q8GT66|TIC40_PEA	Protein TIC 40, chloroplastic OS=Pisum sativum GN=TIC40 PE=1 SV=1	At5g16620	276	6e-91	KOG1308	Hsp70-interacting protein Hip/Transient component of progesterone receptor complexes and an Hsp70-binding protein	OT	Posttranslational modification, protein turnover, chaperones;Signal transduction mechanisms	K06691|1|2e-37|139|apro:F751_6784|26S proteasome regulatory subunit N13!K09560|2|3e-09|59.7|mpp:MICPUCDRAFT_28186|suppressor of tumorigenicity protein 13	-	-	-
5260	PB.32779.1|m.19653	type:suspicious-NA len:636 strand:+ pos:1-1908	68625.8	0.016	1	1	-	0.47	0.779|0.518|0.100	0.343	1|1|1	0.745|0.366|0.033	MLNMLRPLTTPLLFFFLLLLPSSGQSINATCPYDLSPSFCLIPTACYANATSPSATSCCWFVFAAYIYAAVRYSNLTGTVFLPPNSSAACSSSFTHSVIRLGLVSPSLLPSSSCSLDGDGDGPSHFTADDSLPCHFASVSAVRSHADLSPAVRLCTSPAHNITLPSNCQPCQSAVITATFSLLNSTNSKDFITCGMATTIGIWSVTYPSAPLFNSYVLCVLQALENIGDLSTTNLVPSPPPPPDSRTPHPVPKSTSRSRSVKIAAISAAAAVASIAAIIFLTLALKKRQWRTNSIEEEAEDFPPAVIGSRLPTEGLYIFTKSELKQATNGYSEKLFLGEGGAGKVYLGNLPSGQHVAIKRFYKKIKLDEFYSEVQILAKLRHRNLATLVGYCVGSKVNV…	60.297	0	XP_010922820.1	PREDICTED: proline-rich receptor-like protein kinase PERK3 [Elaeis guineensis]	37.28	8e-64	sp|Q9LMN7|WAK5_ARATH	Wall-associated receptor kinase 5 OS=Arabidopsis thaliana GN=WAK5 PE=2 SV=1	At3g24550	218	5e-62	KOG1187	Serine/threonine protein kinase	T	Signal transduction mechanisms	K04733|1|0.0|592|nnu:104612951|interleukin-1 receptor-associated kinase 4 [EC:2.7.11.1]		GO:0005524//ATP binding;GO:0004672//protein kinase activity	GO:0016021//integral component of membrane
5320	PB.25692.1|m.150145	type:suspicious-NA len:136 strand:+ pos:926-1333	15938.4	0.081	1	1	PB.5216.1|m.171687;PB.19784.1|m.163327;PB.808.4|m.58843;PB.23372.4|m.108148;PB.23372.3|m.95191;PB.23372.6|m.115495;PB.23372.8|m.136260;PB.23372.9|m.150329;PB.23372.1|m.15363;PB.23372.7|m.134025	0.89	0.148|2.068|0.463	1.03	1|1|1	0.020|0.314|0.306	SYKLTFCKRGKHGGEATLEAVRLIADQVKNHDCQLHPDCLKVFLSLVFDEDLGKSEPKENEKFKSKKKRQWNTSEEPNQSKGSDAKRQKKELLAKTREERLMQILRQFHLLQTQVREGVCNLTLSLLFLRHISVF	58.088	8e-37	XP_020269074.1	nucleolar complex protein 3 homolog [Asparagus officinalis]	-	-	-	-	At1g79150	82.4	6e-19	KOG2153	Protein involved in the nuclear export of pre-ribosomes	JU	Translation, ribosomal structure and biogenesis;Intracellular trafficking, secretion, and vesicular transport	K14834|1|1e-37|139|aof:109844447|nucleolar complex protein 3	-	-	-
5324	PB.73922.1|m.22000	type:confident-5partial len:175 strand:+ pos:3-527	19793.2	0.379	4	25	-	0.95	0.671|1.079|1.113	0.246	24|25|25	0.007|0.815|0.259	SNTNLINEANQSKAIKMSLVPFGFGSRVFDPSSSFDLWDPIDSFFRDVVPRANNLNFPSETSAFANTRIDWKETPEAHVFKADLPGIKKEEVKVEVEEGRILQISGERRKEQEEKNDTWHRVERSSGKFLRRFRMPENAKVEEVRASMENGVLTVTVPKAEVKKPEVKSIDISG	75.152	7e-78	ADU55794.1	HSP18.1B [Citrullus lanatus]	69.14	2e-73	sp|P27880|HSP12_MEDSA	18.2 kDa class I heat shock protein OS=Medicago sativa GN=HSP18.2 PE=2 SV=1	At1g53540	206	2e-68	KOG0710	Molecular chaperone (small heat-shock protein Hsp26/Hsp42)	O	Posttranslational modification, protein turnover, chaperones	K13993|1|3e-78|234|aof:109851516|HSP20 family protein	-	-	-
5373	PB.74417.1|m.22999	type:confident-complete len:121 strand:+ pos:73-435	13584.7	0.242	3	28	-	0.88	0.725|0.927|0.998	0.142	23|25|26	0.007|0.290|0.983	MEVHHHHQLKDTSSKVVKVDSKESWESLIAQANLQGCPVAVHFTASWCVPSLAMNSYIEEMATSYENVKFLMVDVDDVKEVASKMEVKAMPTFVLMKEGVVVDRFIGANPDEMKKRIDAL	66.957	1e-54	XP_012091425.1	thioredoxin-like protein CXXS1 [Jatropha curcas]	57.01	1e-46	sp|Q8LDI5|CXXS1_ARATH	Thioredoxin-like protein CXXS1 OS=Arabidopsis thaliana GN=CXXS1 PE=2 SV=2	At1g11530	146	2e-46	KOG0907	Thioredoxin	O	Posttranslational modification, protein turnover, chaperones	K03671|1|2e-55|172|jcu:105649401|thioredoxin 1	GO:0006662//glycerol ether metabolic process;GO:0045454//cell redox homeostasis	GO:0015035//protein disulfide oxidoreductase activity	GO:0005623//cell
5449	PB.30319.1|m.15205	type:confident-complete len:577 strand:+ pos:156-1886	62780	0.481	22	58	-	0.9	0.796|0.915|0.978	0.092	57|58|57	0.007|0.238|0.837	MAEPIYTVASDNETTGDDRSQSSFSEIALGIDIGTSQCSVAIWNGSRVELLRNTRRQKLMRSYVIFKNEVPSGGISEEIPHGEEEIYSGSAIFNMKRLVGRMDTDPVVHASKGVPFLVQTLGIGFRPFIAAMVNNVWRSTTPEEVLAIFLVELKAMAEIQLKRPIKNVVVTIPSSFSRFQHTRIERACAMAGLQVLRLMPEPTCVALVYAQKQQQSVPESKGSGIEKVALIFNMGAGYCDVAVTATAGGVSEIRSQSGSPVGGEDILQNILRYLVPEFESLCSNRSTIDGLRSMGLLRIVAQDAIHKLSSETSVKIDVDLGSGKKLARLVDRSEFEKVNSEVFEKCSQLVVRCLADAKLVAEDISDVILVGGCSKIPKIRSLVLELCKKTDSYAGIDPL…	74.261	0	AIZ68151.1	heat shock 70 kDa protein 8 isoform X1 [Ornithogalum longebracteatum]	63.89	0	sp|Q9SKY8|HSP7H_ARATH	Heat shock 70 kDa protein 8 OS=Arabidopsis thaliana GN=HSP70-8 PE=1 SV=1	At2g32120	780	0	KOG0101	Molecular chaperones HSP70/HSC70, HSP70 superfamily	O	Posttranslational modification, protein turnover, chaperones	K09489|1|0.0|879|egu:105036067|heat shock 70kDa protein 4		GO:0005524//ATP binding	-
5466	PB.45236.3|m.82655	type:confident-complete len:434 strand:+ pos:212-1513	48693	0.194	7	9	PB.45236.1|m.2521	0.93	0.795|0.972|1.023	0.12	7|8|8	0.015|0.913|0.950	MPASSTSSLPKKSSDLPSGLLSLARPFLRGELEAVDPALPSLVSTLRSVGAGECWHKHGTFLAHLLDVHRILTLWGAPRAVSLCGLFHSAYSNSYVNLAIFDPATSRAHVASLLGPSAERLVHLFCVVDRQALIHDRLLFAYSPTELALHLAASQSSLADARERAVFDRSEPWRAKLNSLVPAEGVTVKHIRTGEDVVVSRRVVATFLMMTMADFSDQLFGFQDYLFDNDDGKLEFRGNSFATALWPGDGRPGLWLNSVSRMGAVYMLMVREEEIYLEERRKRNDVESDITITTRDEEIELVVPPVFERCTKVLDATEQRVGRDLYWEAVGGAARREGLEEVERLLVESIGRNPFVGEPHVVLGQVYLGLGRYEEAEEEAEEGLRLILEWGSGWDKRVS…	68.235	0	XP_012068566.1	uncharacterized protein LOC105631161 [Jatropha curcas]	-	-	-	-	-	-	-	-	-	-	-	-	-	-	-
5527	PB.62862.1|m.30914	type:confident-5partial len:261 strand:+ pos:2-784	27657.7	0.604	3	5	-	0.89	0.714|0.880|1.077	0.182	5|4|5	0.028|0.681|0.888	YSVAVKLSSPSIPLQPNLIPLSLETLTLMASIAAATLTAGKLIRPAASLSSTAIFSPSRLSFRLRFSPSSYLLRRHYKSSGNRFVTKLSTSAAPAATATISVGDKLPDSTLSYFDPAGELQTVTVSDLTQGKKAILFAVPGAFTPTCSQKHLPGFIEKAAELRAKGVDTIACISVNDAFVMKAWKENLSVGDEVLLLSDGNGDFTRALGVELDLTDKPIGLGVRSRRYALLAEDGVVKVLNLEEGGAFTNSSAEDMLKIL	71.491	3e-107	XP_010243544.1	PREDICTED: peroxiredoxin-2E-1, chloroplastic [Nelumbo nucifera]	62.08	2e-98	sp|Q949U7|PRX2E_ARATH	Peroxiredoxin-2E, chloroplastic OS=Arabidopsis thaliana GN=PRXIIE PE=1 SV=2	At3g52960	287	4e-98	KOG0541	Alkyl hydroperoxide reductase/peroxiredoxin	O	Posttranslational modification, protein turnover, chaperones	K03386|1|1e-61|195|ath:AT1G60740|peroxiredoxin (alkyl hydroperoxide reductase subunit C) [EC:1.11.1.15]!K11187|2|1e-33|124|cvr:CHLNCDRAFT_36706|peroxiredoxin 5, atypical 2-Cys peroxiredoxin [EC:1.11.1.15]	GO:0045454//cell redox homeostasis	GO:0051920//peroxiredoxin activity;GO:0004601//peroxidase activity;GO:0016491//oxidoreductase activity	GO:0005623//cell
5530	PB.25813.3|m.30630	type:confident-5partial len:807 strand:+ pos:2-2422	89694.6	0.243	3	15	-	0.9	0.761|0.907|1.038	0.139	15|15|14	0.007|0.732|0.734	KYPSKSSPARARARARRRRRTKTGQEEEPTPSSSSYIYVLSIPDSDLILTLYNNTPFTFTVSRRGSQKNETVFEVAAPGIVFKDQYLEMSTSLHPESAIYGLGEHTKRSFRLNSGTMTLWNSDVSASSVDQSLYGSHPFYMDVRAAAAAHGVLLLNSNGMDVIYNGNGMDPQLTYKVIGGIFDLYFFAGPSPLAVMDQYTDLIGRPAAMPYWAFGFHQCRYGYKNVADLEYVVDGYAKAGIPLEVMWTDIDYMDSYKDFTFDPVNFPVDRMNALLARLHSNGQKYVPIVDPGISVNNAYGTFLRGLADGIYAQRNGTNYLGRVWPGDVYFPDFLHPNASRFWLREMSMFRQTLPVDGIWIDMNELSNFITSSPLNGLDSPPYRIQRSLLDRTLPPSSIH…	69.935	0	XP_020270489.1	probable alpha-glucosidase Os06g0675700 [Asparagus officinalis]	59.36	0	sp|Q653V7|AGLU_ORYSJ	Probable alpha-glucosidase Os06g0675700 OS=Oryza sativa subsp. japonica GN=Os06g0675700 PE=1 SV=1	At5g11720	918	0	KOG1065	Maltase glucoamylase and related hydrolases, glycosyl hydrolase family 31	G	Carbohydrate transport and metabolism	K01187|1|0.0|1134|aof:109845629|alpha-glucosidase [EC:3.2.1.20]	GO:0005975//carbohydrate metabolic process	GO:0030246//carbohydrate binding;GO:0004553//hydrolase activity, hydrolyzing O-glycosyl compounds	-
Note：# Identified unique peptide number of protein ，*Identified unique spectrum number of protein，★Spectrum number of flower/non-flower,▲ Statistical test Qvalue of flower/non-flower
