# Supplementary material for: Screening of Key Proteins Affecting Floral Initiation of Saffron Under Cold Stress Using iTRAQ-Based Proteomics
Source: Frontiers journal article supplement (doi:10.3389/fpls.2021.644934), 2021-05-11
Supplement: Table_3.XLS [file Table_3.XLS]

## Sheet: Sheet1
Table S3. Pathway terms annotated across all identified proteins
#Pathway	Count (4909)	Pathway ID	Proteins	KOs
Metabolic pathways	1536 (31.29%)	ko01100	PB.10004.5|m.71191;PB.10004.6|m.90137;PB.10004.7|m.176152;PB.10012.1|m.168504;PB.10035.2|m.16597;PB.10064.12|m.156709;PB.10403.1|m.174398;PB.10439.1|m.150936;PB.10443.1|m.160680;PB.10467.11|m.93577;PB.10467.9|m.82667;PB.10476.6|m.42389;PB.10652.25|m.105134;PB.10858.1|m.2528;PB.10858.4|m.12198;PB.10971.1|m.180825;PB.10973.17|m.74667;PB.10973.1|m.661;PB.11077.1|m.161771;PB.11162.1|m.168078;PB.1119.…	K04487+K02112+K11262+K01214+K02111+K00895+K00145+K00297+K02145+K00128+K00549+K09753+K00999+K01626+K00164+K00705+K01945+K01652+K16055+K01858+K14272+K01823+K01176+K15920+K13065+K01051+K03006+K03950+K00413+K00787+K14157+K00901+K02685+K01953+K14674+K01679+K09699+K00655+K12309+K01915+K00254+K00819+K16871+K01647+K12524+K00053+K00876+K01681+K01595+K00611+K00099+K00856+K03860+K19562+K00392+K01623+K00276+…
Biosynthesis of secondary metabolites	878 (17.89%)	ko01110	PB.10035.2|m.16597;PB.10064.12|m.156709;PB.10439.1|m.150936;PB.10443.1|m.160680;PB.10467.11|m.93577;PB.10467.9|m.82667;PB.10858.1|m.2528;PB.10858.4|m.12198;PB.10971.1|m.180825;PB.10973.17|m.74667;PB.10973.1|m.661;PB.11162.1|m.168078;PB.1119.4|m.25078;PB.11377.2|m.97107;PB.11411.7|m.30873;PB.11585.3|m.159774;PB.11585.4|m.159815;PB.11683.1|m.40157;PB.11686.2|m.15418;PB.11695.8|m.144185;PB.11839.1|m…	K11262+K01214+K00895+K00145+K00128+K00549+K09753+K01626+K00164+K01945+K01652+K18693+K14272+K01823+K13065+K00787+K14157+K00901+K01953+K14674+K01679+K09699+K00655+K00819+K01647+K12524+K00053+K01681+K00611+K00099+K01623+K00276+K01738+K16911+K00800+K00213+K00703+K07409+K02160+K10206+K00602+K01648+K01115+K00700+K01913+K01853+K00454+K01961+K01835+K01613+K09838+K10527+K18857+K01809+K00844+K01649+K01803+…
Carbon metabolism	360 (7.33%)	ko01200	PB.10476.6|m.42389;PB.1119.4|m.25078;PB.11686.2|m.15418;PB.12951.1|m.30729;PB.13550.5|m.94168;PB.13550.6|m.102720;PB.14043.10|m.82887;PB.14043.17|m.131466;PB.14043.24|m.165647;PB.14043.9|m.81892;PB.14247.1|m.181600;PB.1487.16|m.48058;PB.1487.21|m.55941;PB.1487.32|m.78300;PB.14949.1|m.156913;PB.154.13|m.22309;PB.154.17|m.24939;PB.154.34|m.94715;PB.154.61|m.149195;PB.154.83|m.172369;PB.16471.3|m.42…	K00297+K00164+K14272+K01679+K01647+K01681+K01595+K01623+K01738+K02160+K00028+K00122+K01961+K00029+K01455+K00844+K01938+K01803+K01962+K01079+K00134+K00036+K01689+K00121+K01895+K00382+K00249+K00873+K00025+K00026+K00626+K01810+K00615+K00863+K00948+K00600+K01834+K00658+K00031+K00850+K05605+K00234+K11517+K00830+K00161+K00627+K00281+K15633+K15919+K00058+K01783+K00162+K00616+K00140+K00814+K00030+K00033+…
Biosynthesis of amino acids	311 (6.34%)	ko01230	PB.10467.11|m.93577;PB.10467.9|m.82667;PB.10971.1|m.180825;PB.11162.1|m.168078;PB.11411.7|m.30873;PB.11686.2|m.15418;PB.13195.6|m.65766;PB.13550.5|m.94168;PB.13550.6|m.102720;PB.1382.17|m.146747;PB.13830.13|m.118748;PB.13830.3|m.14900;PB.13838.19|m.77259;PB.13838.26|m.100410;PB.13838.33|m.113765;PB.14043.10|m.82887;PB.14043.17|m.131466;PB.14043.24|m.165647;PB.14043.9|m.81892;PB.14250.2|m.52736;PB…	K00145+K00549+K01626+K01652+K14272+K01915+K01647+K12524+K00053+K01681+K00611+K01623+K01738+K00800+K10206+K01649+K01803+K01079+K00134+K01689+K00873+K01653+K12657+K01814+K00013+K00615+K13832+K01687+K00264+K00948+K00600+K01834+K00031+K00850+K00817+K01438+K01657+K15633+K00766+K00058+K01783+K01703+K01739+K14677+K00616+K01663+K01714+K00826+K00789+K01736+K00928+K00814+K15849+K00030+K01733+K01755+K00872+…
Protein processing in endoplasmic reticulum	210 (4.28%)	ko04141	PB.10048.5|m.195436;PB.10129.2|m.161482;PB.10519.2|m.184572;PB.10994.23|m.133527;PB.10994.8|m.31803;PB.11711.1|m.24640;PB.12898.11|m.30174;PB.12898.31|m.123717;PB.13023.25|m.101352;PB.13100.3|m.184914;PB.13527.28|m.197180;PB.14086.3|m.35689;PB.1409.69|m.187045;PB.14239.2|m.82320;PB.144.1244|m.160554;PB.144.297|m.118475;PB.144.30|m.14969;PB.144.510|m.120911;PB.144.567|m.123528;PB.144.592|m.125094;…	K13249+K14006+K03283+K09487+K14007+K10956+K13993+K14004+K14005+K04523+K04079+K09584+K09490+K14018+K05546+K07151+K01228+K11718+K08653+K12667+K10839+K14016+K09580+K08057+K03347+K09523+K08288+K13525+K09503+K09540+K08054+K14015+K12666+K01230+K09518+K09486+K14012+K12668+K12670+K09517+K14003+K09562+K03237+K10597+K04554+K07953+K14009+K03868+K16196+K13250+K03094+K13984+K13719+K10575+K12669+K06689+K09481+…
Ribosome	197 (4.01%)	ko03010	PB.1.137|m.211519;PB.10500.3|m.9041;PB.12410.1|m.37293;PB.13419.3|m.171674;PB.13428.18|m.187952;PB.13428.21|m.198738;PB.14097.6|m.181558;PB.1494.3|m.28352;PB.1494.8|m.38501;PB.15080.3|m.178023;PB.16159.1|m.160419;PB.17840.5|m.162012;PB.17859.2|m.34043;PB.17922.3|m.176391;PB.22329.35|m.88894;PB.22329.4|m.7585;PB.22994.3|m.38051;PB.23833.2|m.181365;PB.25252.24|m.206014;PB.25363.2|m.39139;PB.25400.1…	K02948+K02925+K02875+K02880+K02985+K02949+K02981+K02957+K02995+K02986+K02984+K02973+K02941+K02906+K02998+K02889+K02932+K02978+K02874+K02872+K02952+K02940+K02994+K02864+K02886+K02962+K02939+K02937+K02938+K02865+K02901+K02945+K02908+K02927+K02934+K02969+K02991+K02893+K02989+K02936+K02877+K02997+K02863+K02956+K02960+K02930+K02885+K02965+K02955+K02947+K02958+K02943+K02870+K02894+K02926+K02935+K02993+…
Glycolysis / Gluconeogenesis	176 (3.59%)	ko00010	PB.10439.1|m.150936;PB.10858.1|m.2528;PB.10858.4|m.12198;PB.1487.16|m.48058;PB.1487.21|m.55941;PB.1487.32|m.78300;PB.15031.3|m.152839;PB.17392.1|m.167016;PB.18428.1|m.153864;PB.1878.6|m.104960;PB.1898.1|m.1641;PB.1898.2|m.2271;PB.1898.42|m.222144;PB.19185.2|m.14070;PB.19349.11|m.49466;PB.19452.10|m.53100;PB.19452.14|m.61143;PB.19452.17|m.66542;PB.19452.34|m.198288;PB.20566.11|m.42839;PB.20566.24|…	K00895+K00128+K01623+K03103+K01913+K01835+K18857+K00844+K01803+K00134+K01689+K00121+K01895+K00382+K00873+K01810+K01834+K00850+K00161+K00627+K15633+K00162+K01568+K14085+K00001+K00927+K00002+K00016+K03841+K01792+K01785+K00131+K15634+K01610
RNA transport	170 (3.46%)	ko03013	PB.10191.9|m.149603;PB.10463.1|m.3504;PB.10463.4|m.9643;PB.1071.1|m.178205;PB.1092.10|m.30310;PB.1092.34|m.139541;PB.1100.5|m.26736;PB.1117.5|m.81629;PB.1117.6|m.116539;PB.12816.11|m.180530;PB.12939.7|m.105075;PB.13070.36|m.196438;PB.1309.20|m.128469;PB.1335.11|m.59638;PB.1335.5|m.21778;PB.14055.1|m.102333;PB.14086.3|m.35689;PB.14240.1|m.169985;PB.15101.2|m.156725;PB.15607.5|m.20131;PB.15607.6|m.…	K14293+K03231+K14326+K13126+K02516+K12875+K03240+K14309+K00784+K14004+K03257+K14288+K03252+K14290+K03254+K12881+K12882+K03239+K03260+K12878+K13174+K03250+K14306+K14297+K14304+K03238+K14312+K03248+K03253+K03246+K09291+K14315+K12812+K14319+K03251+K14310+K14295+K07936+K14320+K07562+K03262+K13025+K03241+K03754+K14314+K14303+K12879+K13137+K03245+K14298+K14525+K14308+K03243+K13114+K14300+K03237+K14299+…
Spliceosome	159 (3.24%)	ko03040	PB.10519.2|m.184572;PB.10719.2|m.33441;PB.10910.1|m.167813;PB.11236.1|m.172357;PB.1236.4|m.22082;PB.12474.12|m.144613;PB.12675.1|m.30139;PB.12816.11|m.180530;PB.14582.12|m.118568;PB.1511.37|m.134174;PB.15829.2|m.157133;PB.16252.4|m.207080;PB.16709.15|m.126972;PB.16709.20|m.151832;PB.16800.4|m.151020;PB.174.126|m.120329;PB.174.20|m.21939;PB.174.285|m.158496;PB.174.36|m.74202;PB.17847.1|m.18600;PB.…	K03283+K12893+K12856+K12834+K12825+K12821+K12885+K12875+K12823+K12881+K12882+K12854+K12830+K12878+K12818+K12813+K12897+K12836+K12829+K12891+K12835+K12900+K06063+K12820+K12822+K12852+K12867+K12860+K12733+K12837+K12815+K11093+K11086+K12741+K11094+K12896+K10599+K12890+K12833+K12812+K12870+K09564+K12828+K12841+K12844+K13025+K12662+K12827+K12879+K12857+K11092+K11091+K12826+K12859+K12883+K12876+K12848+…
Starch and sucrose metabolism	145 (2.95%)	ko00500	PB.10064.12|m.156709;PB.11198.17|m.144534;PB.11198.26|m.177717;PB.11198.28|m.180055;PB.11198.6|m.31825;PB.11437.11|m.152288;PB.11585.3|m.159774;PB.11585.4|m.159815;PB.11696.2|m.151743;PB.14557.6|m.126871;PB.14628.10|m.166766;PB.15577.10|m.114825;PB.15577.8|m.111369;PB.16766.9|m.123632;PB.17182.15|m.135736;PB.17182.16|m.143266;PB.17182.20|m.162522;PB.1878.6|m.104960;PB.18859.3|m.158261;PB.19185.2|…	K01214+K00705+K16055+K01176+K00703+K01177+K00700+K01835+K01179+K00844+K00695+K19891+K00688+K01187+K01810+K01087+K05350+K07024+K00963+K00696+K05349+K13679+K01193+K00975+K19893+K01513+K19892+K00847+K01188+K18447
Pyruvate metabolism	136 (2.77%)	ko00620	PB.10035.2|m.16597;PB.10443.1|m.160680;PB.10858.1|m.2528;PB.10858.4|m.12198;PB.12951.1|m.30729;PB.14247.1|m.181600;PB.154.13|m.22309;PB.154.17|m.24939;PB.154.34|m.94715;PB.154.61|m.149195;PB.154.83|m.172369;PB.16471.3|m.42760;PB.16774.13|m.142571;PB.16774.1|m.3567;PB.17392.1|m.167016;PB.17792.13|m.85858;PB.17792.6|m.15916;PB.18132.5|m.107545;PB.19220.11|m.135492;PB.19375.10|m.144625;PB.19375.9|m.…	K11262+K00128+K01679+K01595+K02160+K00028+K01913+K01961+K00029+K01649+K01962+K18881+K01895+K00382+K00873+K00025+K00026+K00626+K00161+K00627+K00162+K00102+K14085+K01069+K01006+K01759+K00016+K01963+K01610
Endocytosis	120 (2.44%)	ko04144	PB.1000.7|m.25521;PB.10519.2|m.184572;PB.11411.7|m.30873;PB.12034.1|m.169544;PB.13645.2|m.23983;PB.14302.2|m.179764;PB.1511.37|m.134174;PB.16126.1|m.149991;PB.16397.1|m.8990;PB.16955.9|m.148858;PB.17119.2|m.133653;PB.174.126|m.120329;PB.174.20|m.21939;PB.174.285|m.158496;PB.174.36|m.74202;PB.18905.1|m.14699;PB.1891.23|m.130805;PB.1955.45|m.117044;PB.1955.64|m.148774;PB.1955.79|m.163382;PB.1955.99…	K01528+K03283+K12486+K12472+K12483+K04646+K11247+K01115+K18468+K12200+K10396+K11827+K12479+K19476+K07904+K05747+K18442+K11824+K11866+K07901+K17917+K12196+K04645+K12183+K05757+K07897+K07937+K12195+K10365+K10364+K12194+K18466+K11826+K12185+K07889+K07888+K12189+K18467+K12197+K12489+K18441+K19366
Purine metabolism	119 (2.42%)	ko00230	PB.11377.2|m.97107;PB.11931.1|m.162447;PB.12689.1|m.175124;PB.14484.3|m.170665;PB.14995.15|m.148175;PB.15074.3|m.163466;PB.16308.2|m.175594;PB.16923.22|m.112269;PB.16923.3|m.11718;PB.1878.6|m.104960;PB.21039.9|m.156260;PB.21662.4|m.17914;PB.24149.19|m.110922;PB.24149.1|m.3557;PB.24149.2|m.4751;PB.24440.2|m.135055;PB.2558.3|m.220143;PB.26318.27|m.134884;PB.26526.1|m.141722;PB.26740.5|m.130272;PB.2…	K01945+K03006+K02685+K00856+K10807+K10808+K01519+K00602+K01835+K01427+K00873+K11808+K00759+K02321+K00948+K03011+K01952+K03040+K00106+K01081+K03017+K00939+K02083+K01756+K01933+K01466+K01951+K01490+K00962+K00365+K13811+K01939+K01513+K01487+K18151+K03027+K03787+K00601+K00940+K18453+K14977+K00088+K01517+K18447+K00942+K01923+K02326+K01522+K03015+K03012+K03016+K00760
Oxidative phosphorylation	119 (2.42%)	ko00190	PB.10012.1|m.168504;PB.10403.1|m.174398;PB.10652.25|m.105134;PB.11961.1|m.37965;PB.11989.1|m.8242;PB.1284.21|m.104307;PB.1284.35|m.178512;PB.13974.8|m.163211;PB.14203.2|m.36712;PB.1509.20|m.123280;PB.1509.2|m.17153;PB.152.14|m.32293;PB.152.33|m.142224;PB.152.44|m.160315;PB.1644.10|m.20237;PB.1644.49|m.135486;PB.16759.1|m.30033;PB.16759.6|m.183153;PB.17384.25|m.108164;PB.17619.7|m.150882;PB.20125.…	K02112+K02111+K02145+K03950+K00413+K01507+K01535+K02154+K03934+K02267+K02147+K03878+K03881+K00411+K03883+K02137+K02115+K02146+K00234+K02133+K02261+K02136+K11353+K02151+K02256+K02144+K00235+K03942+K03953+K02132+K02148+K02155+K02130+K03938+K02149+K02150+K02114+K02262+K03943+K03936+K02266+K03940+K02134+K02113+K02265+K03941+K03949+K02140+K02138+K03955+K03879+K03966+K11352+K00417+K03965+K03939+K03963+…
Amino sugar and nucleotide sugar metabolism	112 (2.28%)	ko00520	PB.11809.2|m.17105;PB.1275.2|m.17016;PB.15747.3|m.9044;PB.15755.1|m.168599;PB.16660.12|m.105278;PB.16660.1|m.2308;PB.16660.2|m.8196;PB.16663.4|m.208036;PB.17873.23|m.58269;PB.17873.32|m.74477;PB.17873.48|m.97831;PB.18430.15|m.150244;PB.18430.2|m.22786;PB.1878.6|m.104960;PB.18820.10|m.156325;PB.18820.1|m.582;PB.18820.5|m.16339;PB.19021.3|m.212171;PB.19185.2|m.14070;PB.19272.4|m.150279;PB.21588.5|m…	K15920+K01209+K00012+K12447+K00972+K12449+K01835+K01809+K00844+K13648+K20547+K08678+K01810+K13379+K00966+K05305+K00621+K00963+K17497+K10046+K00820+K06118+K12373+K01183+K00975+K12451+K00847+K01784+K01711+K00326+K01836+K16190+K01097+K00965+K02377+K12450+K12446
Glyoxylate and dicarboxylate metabolism	108 (2.2%)	ko00630	PB.10693.1|m.174470;PB.11686.2|m.15418;PB.13195.6|m.65766;PB.13550.5|m.94168;PB.13550.6|m.102720;PB.14043.10|m.82887;PB.14043.17|m.131466;PB.14043.24|m.165647;PB.14043.9|m.81892;PB.1719.13|m.38840;PB.1719.26|m.161368;PB.17392.1|m.167016;PB.17740.1|m.147482;PB.18245.2|m.147407;PB.21180.4|m.111071;PB.21423.1|m.8827;PB.21423.3|m.147114;PB.22304.23|m.48342;PB.22304.24|m.50375;PB.22304.27|m.53359;PB.2…	K00284+K14272+K01915+K01647+K01681+K01913+K00122+K01455+K01895+K00382+K00025+K00026+K00626+K00600+K01569+K11517+K00830+K00281+K15919+K22133+K03781+K01637+K00605+K15918+K18121+K01601+K19269+K15893+K02437
Citrate cycle (TCA cycle)	107 (2.18%)	ko00020	PB.1119.4|m.25078;PB.12951.1|m.30729;PB.13550.5|m.94168;PB.13550.6|m.102720;PB.14043.10|m.82887;PB.14043.17|m.131466;PB.14043.24|m.165647;PB.14043.9|m.81892;PB.1701.16|m.110633;PB.1701.5|m.12200;PB.1719.13|m.38840;PB.1719.26|m.161368;PB.19866.3|m.23888;PB.21423.1|m.8827;PB.21423.3|m.147114;PB.22304.23|m.48342;PB.22304.24|m.50375;PB.22304.27|m.53359;PB.22304.2|m.4231;PB.22304.31|m.59698;PB.22720.6…	K00164+K01679+K01647+K01681+K01648+K00382+K00025+K00026+K00658+K00031+K00234+K00161+K00627+K00162+K00030+K01900+K00235+K01899+K01610
Cysteine and methionine metabolism	104 (2.12%)	ko00270	PB.10971.1|m.180825;PB.11411.7|m.30873;PB.1382.17|m.146747;PB.14949.1|m.156913;PB.15357.1|m.27686;PB.15634.1|m.16657;PB.15925.1|m.146969;PB.1600.2|m.216800;PB.17042.3|m.191074;PB.17849.2|m.141679;PB.184.37|m.141402;PB.184.40|m.149204;PB.1920.5|m.211412;PB.2147.11|m.30272;PB.2147.35|m.149220;PB.22172.4|m.57680;PB.22304.23|m.48342;PB.22304.24|m.50375;PB.22304.27|m.53359;PB.22304.2|m.4231;PB.22304.3…	K00549+K12524+K01738+K17398+K01251+K21456+K00025+K00026+K00797+K01011+K01919+K01739+K00827+K22207+K00826+K00789+K16054+K05933+K00928+K00811+K00815+K01760+K00899+K14454+K14455+K00016+K00133+K13034+K05396+K00640+K00547+K01244+K08967+K08963
RNA degradation	101 (2.06%)	ko03018	PB.1092.10|m.30310;PB.1092.34|m.139541;PB.11131.1|m.37659;PB.11351.17|m.177814;PB.1300.27|m.186168;PB.1300.29|m.219435;PB.13040.2|m.17266;PB.13603.1|m.27003;PB.15017.1|m.154541;PB.1544.40|m.188999;PB.16658.19|m.135404;PB.17470.5|m.193399;PB.17819.1|m.11043;PB.17819.2|m.16784;PB.17819.9|m.166409;PB.1785.13|m.102014;PB.18435.6|m.154273;PB.1877.2|m.6765;PB.1877.30|m.102842;PB.1877.38|m.112767;PB.189…	K13126+K04043+K12598+K04077+K01148+K12599+K14442+K12616+K12617+K12580+K12619+K03678+K12585+K01689+K12591+K12603+K00850+K12606+K12600+K00962+K12607+K12613+K12589+K12602+K12586+K12611+K12608+K12590+K03681+K12604+K12581+K12620+K08311+K12587+K07573+K12625+K12626+K12622+K12621+K12614
Proteasome	90 (1.83%)	ko03050	PB.10759.13|m.176397;PB.11567.11|m.180517;PB.1221.7|m.50690;PB.13037.1|m.36850;PB.15449.2|m.46476;PB.15449.4|m.72880;PB.15570.4|m.81660;PB.16542.1|m.4493;PB.16542.3|m.13146;PB.1673.3|m.179307;PB.18695.7|m.36609;PB.20679.3|m.190227;PB.22063.3|m.14545;PB.22063.4|m.16427;PB.23210.5|m.13806;PB.24403.1|m.30389;PB.24403.5|m.44484;PB.24403.6|m.56185;PB.2530.10|m.147069;PB.2530.21|m.180726;PB.28316.3|m.1…	K03032+K03061+K02738+K02737+K03065+K03064+K03036+K03066+K03037+K03039+K03028+K03029+K03035+K06691+K03031+K02732+K03030+K02731+K02729+K03033+K03062+K03038+K03063+K02730+K02727+K06700+K02735+K02725+K02726+K02728+K02736+K02734+K02739
Carbon fixation in photosynthetic organisms	89 (1.81%)	ko00710	PB.11686.2|m.15418;PB.14247.1|m.181600;PB.1487.16|m.48058;PB.1487.21|m.55941;PB.1487.32|m.78300;PB.154.13|m.22309;PB.154.17|m.24939;PB.154.34|m.94715;PB.154.61|m.149195;PB.154.83|m.172369;PB.16774.13|m.142571;PB.16774.1|m.3567;PB.18132.5|m.107545;PB.19349.11|m.49466;PB.19452.10|m.53100;PB.19452.14|m.61143;PB.19452.17|m.66542;PB.19452.34|m.198288;PB.22304.23|m.48342;PB.22304.24|m.50375;PB.22304.27…	K14272+K01595+K01623+K00028+K00029+K01803+K00134+K00025+K00026+K00615+K01783+K00814+K00927+K14454+K14455+K01006+K03841+K01601+K01807+K01610
Glycine, serine and threonine metabolism	88 (1.79%)	ko00260	PB.11686.2|m.15418;PB.1382.17|m.146747;PB.149.2|m.9304;PB.149.7|m.20319;PB.15165.1|m.7356;PB.17849.2|m.141679;PB.19380.1|m.37507;PB.21423.1|m.8827;PB.21423.3|m.147114;PB.22172.4|m.57680;PB.28129.2|m.135996;PB.28316.3|m.104610;PB.2912.14|m.80218;PB.2912.4|m.7750;PB.2912.5|m.8184;PB.2912.6|m.8464;PB.30704.8|m.190216;PB.32070.7|m.79272;PB.3252.13|m.124709;PB.34157.11|m.97412;PB.34157.12|m.95971;PB.3…	K14272+K12524+K00276+K12235+K01079+K00382+K00600+K01834+K00130+K00830+K00281+K15633+K15919+K00058+K00827+K14085+K00928+K01733+K00872+K06001+K01695+K00831+K01696+K00605+K15918+K00133+K00306+K15893+K15634+K02437+K01754
Plant-pathogen interaction	87 (1.77%)	ko04626	PB.10994.23|m.133527;PB.10994.8|m.31803;PB.11531.10|m.213331;PB.11531.2|m.7742;PB.12898.11|m.30174;PB.12898.31|m.123717;PB.144.1244|m.160554;PB.144.297|m.118475;PB.144.30|m.14969;PB.144.510|m.120911;PB.144.567|m.123528;PB.144.592|m.125094;PB.144.667|m.128426;PB.144.745|m.125365;PB.144.960|m.130813;PB.15834.1|m.91345;PB.16415.1|m.7821;PB.19883.2|m.8804;PB.20555.1|m.152811;PB.22577.7|m.64095;PB.236…	K09487+K13413+K04079+K13448+K00864+K13412+K13420+K13436+K13429+K12795+K13459+K04368+K05391+K13434+K13458+K02183+K13457
Peroxisome	86 (1.75%)	ko04146	PB.10035.2|m.16597;PB.1785.13|m.102014;PB.19380.1|m.37507;PB.19982.1|m.8594;PB.2196.10|m.126437;PB.2275.15|m.112096;PB.2275.19|m.113215;PB.23296.1|m.15393;PB.24043.1|m.23695;PB.24043.5|m.130600;PB.25829.4|m.133295;PB.2672.14|m.134351;PB.27040.5|m.53241;PB.2875.14|m.181312;PB.2875.1|m.24822;PB.30757.1|m.130967;PB.31510.6|m.45269;PB.32070.7|m.79272;PB.3264.28|m.176766;PB.33929.1|m.125970;PB.39186.4…	K12663+K08726+K00232+K01897+K00031+K13343+K11517+K00830+K00106+K12261+K07513+K13354+K03781+K11187+K03426+K01640+K00869+K00306+K04565+K13237+K13341+K13352+K13347+K13337+K11147+K13346+K04564+K13338+K13348
Glutathione metabolism	86 (1.75%)	ko00480	PB.11770.1|m.161329;PB.13969.4|m.195018;PB.14471.10|m.175487;PB.14995.15|m.148175;PB.15074.3|m.163466;PB.17042.3|m.191074;PB.20293.2|m.120167;PB.20319.13|m.135879;PB.20319.14|m.160778;PB.2265.5|m.174087;PB.23255.1|m.145900;PB.24506.1|m.54023;PB.24727.1|m.21314;PB.26443.6|m.206394;PB.2875.14|m.181312;PB.2875.1|m.24822;PB.30539.1|m.2934;PB.30539.4|m.28677;PB.3111.1|m.24068;PB.32807.1|m.8136;PB.3280…	K00383+K00799+K10807+K10808+K21456+K18592+K00036+K01256+K01469+K00797+K21888+K00031+K01919+K01255+K00033+K00434+K00432
2-Oxocarboxylic acid metabolism	84 (1.71%)	ko01210	PB.10467.11|m.93577;PB.10467.9|m.82667;PB.11411.7|m.30873;PB.11686.2|m.15418;PB.13550.5|m.94168;PB.13550.6|m.102720;PB.13830.13|m.118748;PB.13830.3|m.14900;PB.13838.19|m.77259;PB.13838.26|m.100410;PB.13838.33|m.113765;PB.14043.10|m.82887;PB.14043.17|m.131466;PB.14043.24|m.165647;PB.14043.9|m.81892;PB.15428.3|m.22993;PB.1719.13|m.38840;PB.1719.26|m.161368;PB.19220.11|m.135492;PB.19904.5|m.145516;P…	K00145+K01652+K14272+K01647+K00053+K01681+K01649+K01653+K01687+K00031+K01438+K01703+K14677+K00826+K00928+K00814+K00030+K00818+K00811+K14454+K14455+K00620+K00930+K00133+K00052+K01704
Fatty acid metabolism	84 (1.71%)	ko01212	PB.10035.2|m.16597;PB.10443.1|m.160680;PB.16471.3|m.42760;PB.17792.13|m.85858;PB.17792.6|m.15916;PB.18896.6|m.144694;PB.19375.10|m.144625;PB.19375.9|m.125488;PB.19982.1|m.8594;PB.20197.1|m.10202;PB.21614.10|m.147438;PB.2196.10|m.126437;PB.2275.15|m.112096;PB.2275.19|m.113215;PB.23273.10|m.79790;PB.23273.11|m.83738;PB.23296.1|m.15393;PB.24043.1|m.23695;PB.24043.5|m.130600;PB.24415.8|m.139556;PB.25…	K11262+K02160+K01961+K10527+K01962+K00232+K09458+K00249+K01897+K00626+K10258+K07513+K00648+K00208+K10781+K00645+K10251+K01074+K03921+K07512+K00059+K01963+K10703+K02372
Phagosome	79 (1.61%)	ko04145	PB.10050.53|m.83670;PB.10050.57|m.85802;PB.10652.25|m.105134;PB.13023.25|m.101352;PB.1509.20|m.123280;PB.1509.2|m.17153;PB.15636.40|m.209082;PB.15636.41|m.216535;PB.17384.25|m.108164;PB.20979.4|m.157979;PB.22302.2|m.178712;PB.22405.2|m.4928;PB.22712.11|m.37297;PB.22712.26|m.83412;PB.2287.17|m.80258;PB.2287.1|m.159;PB.2287.6|m.22638;PB.24300.13|m.88819;PB.24300.4|m.8873;PB.25271.3|m.111497;PB.2573…	K07374+K02145+K10956+K02154+K02147+K00914+K04392+K08057+K07375+K01365+K08054+K02146+K00921+K02151+K02144+K02148+K08492+K08488+K02155+K07897+K02149+K02150+K08517+K07889+K07888+K09481+K02152
mRNA surveillance pathway	76 (1.55%)	ko03015	PB.1071.1|m.178205;PB.1092.10|m.30310;PB.1092.34|m.139541;PB.11229.6|m.24818;PB.1124.15|m.207820;PB.11852.1|m.170405;PB.12537.3|m.169837;PB.12816.11|m.180530;PB.13534.5|m.11359;PB.13805.6|m.175372;PB.14082.1|m.41;PB.15690.6|m.30631;PB.16159.1|m.160419;PB.16252.4|m.207080;PB.16709.15|m.126972;PB.16709.20|m.151832;PB.22176.1|m.9587;PB.22341.2|m.122208;PB.23337.1|m.148271;PB.2342.6|m.94711;PB.24099.…	K14326+K13126+K14411+K13917+K11583+K12875+K04382+K14399+K12881+K12882+K06269+K14402+K15542+K14398+K14403+K11584+K14401+K03456+K04354+K03267+K12812+K14396+K14416+K03265+K13025+K13114+K12883+K14397+K12876+K12877+K14324
Aminoacyl-tRNA biosynthesis	75 (1.53%)	ko00970	PB.12772.4|m.37823;PB.13527.28|m.197180;PB.13831.1|m.51818;PB.16280.1|m.30460;PB.16387.2|m.20285;PB.21508.1|m.10831;PB.21508.3|m.86887;PB.222.17|m.36967;PB.222.45|m.165686;PB.222.4|m.18716;PB.2249.2|m.14087;PB.22492.2|m.95510;PB.22492.4|m.127365;PB.22492.6|m.165146;PB.22598.3|m.169688;PB.22956.1|m.151121;PB.24486.2|m.15254;PB.24486.4|m.29027;PB.25071.1|m.149109;PB.263.5|m.31352;PB.26309.5|m.76388…	K01872+K01881+K01875+K01886+K02433+K01873+K01874+K01892+K01885+K01868+K04567+K01866+K22503+K01887+K01869+K01880+K01883+K01893+K01890+K01876+K01889+K01867+K01870
Pentose phosphate pathway	74 (1.51%)	ko00030	PB.10439.1|m.150936;PB.1487.16|m.48058;PB.1487.21|m.55941;PB.1487.32|m.78300;PB.18428.1|m.153864;PB.1878.6|m.104960;PB.20319.13|m.135879;PB.20319.14|m.160778;PB.2117.35|m.135600;PB.23111.6|m.67995;PB.23111.9|m.81567;PB.23766.2|m.7888;PB.24149.19|m.110922;PB.24149.1|m.3557;PB.24149.2|m.4751;PB.25046.15|m.142632;PB.25046.16|m.138279;PB.27626.2|m.141631;PB.28894.3|m.130927;PB.31292.5|m.122721;PB.320…	K00895+K01623+K01835+K00036+K01810+K00615+K00948+K00850+K00852+K01783+K00616+K00033+K03841+K01057+K00131+K01807+K00851
Pyrimidine metabolism	74 (1.51%)	ko00240	PB.11931.1|m.162447;PB.12689.1|m.175124;PB.13365.1|m.164195;PB.13883.5|m.91145;PB.14995.15|m.148175;PB.15074.3|m.163466;PB.22580.2|m.13444;PB.2451.8|m.102849;PB.2558.3|m.220143;PB.26740.5|m.130272;PB.27728.12|m.69447;PB.28735.3|m.109032;PB.30043.4|m.182771;PB.30077.1|m.22866;PB.3118.22|m.94670;PB.3118.37|m.196843;PB.32303.2|m.191173;PB.35816.2|m.87386;PB.36475.1|m.9411;PB.36582.1|m.147591;PB.3863…	K03006+K02685+K00254+K00876+K10807+K10808+K00207+K00943+K02321+K03011+K01937+K13998+K03040+K13800+K01081+K01955+K03017+K01956+K00962+K13421+K01431+K01464+K01513+K00609+K01465+K03027+K03787+K00761+K00940+K16329+K02326+K03015+K03012+K01520+K03016
Ubiquitin mediated proteolysis	74 (1.51%)	ko04120	PB.13097.1|m.166744;PB.139.11|m.36909;PB.139.30|m.154273;PB.139.6|m.21500;PB.139.8|m.23476;PB.14351.1|m.156525;PB.1517.1|m.14878;PB.15921.2|m.168718;PB.22176.1|m.9587;PB.22756.13|m.136131;PB.22879.4|m.135612;PB.24008.1|m.15788;PB.2522.24|m.128201;PB.2522.36|m.158861;PB.2522.4|m.23362;PB.26.11|m.17556;PB.26.73|m.151098;PB.26.9|m.14517;PB.26104.1|m.140662;PB.26857.2|m.4778;PB.32629.2|m.10126;PB.326…	K10592+K03178+K03349+K10590+K03355+K03347+K03869+K10614+K10615+K10599+K03353+K10576+K10686+K10260+K10610+K10684+K10144+K10589+K10597+K04554+K10609+K03868+K10579+K03094+K10580+K10575+K04649+K10688+K06689+K03873+K03872+K03350
Fructose and mannose metabolism	69 (1.41%)	ko00051	PB.10439.1|m.150936;PB.1487.16|m.48058;PB.1487.21|m.55941;PB.1487.32|m.78300;PB.15203.4|m.180984;PB.18428.1|m.153864;PB.19021.3|m.212171;PB.19185.2|m.14070;PB.19349.11|m.49466;PB.2117.35|m.135600;PB.23111.6|m.67995;PB.23111.9|m.81567;PB.25179.1|m.131097;PB.25600.1|m.196;PB.2586.6|m.92631;PB.2612.1|m.208622;PB.28894.3|m.130927;PB.28949.8|m.55272;PB.31292.5|m.122721;PB.31686.20|m.130981;PB.3199.2|m…	K00895+K01623+K01103+K01809+K00844+K01803+K00966+K00863+K05305+K00850+K17497+K19355+K01805+K00847+K01711+K00008+K03841+K00011+K02377+K18447
MAPK signaling pathway - plant	67 (1.36%)	ko04016	PB.10092.29|m.95867;PB.11531.10|m.213331;PB.11531.2|m.7742;PB.15049.1|m.37775;PB.1968.8|m.131507;PB.23187.8|m.181775;PB.25845.2|m.101720;PB.28649.1|m.131958;PB.32596.1|m.7527;PB.35728.2|m.115493;PB.39479.8|m.197690;PB.39640.1|m.30671;PB.42527.15|m.93339;PB.42527.1|m.1210;PB.42527.3|m.19812;PB.42669.17|m.104317;PB.42669.1|m.9138;PB.44099.1|m.85057;PB.46716.6|m.67070;PB.47484.1|m.81731;PB.47696.9|m…	K14498+K13413+K20553+K20718+K20547+K13422+K13420+K20557+K20600+K03781+K14512+K20536+K20535+K14496+K00940+K14497+K02183+K20607
Phenylpropanoid biosynthesis	67 (1.36%)	ko00940	PB.10973.17|m.74667;PB.10973.1|m.661;PB.11839.1|m.14289;PB.22302.2|m.178712;PB.22661.5|m.52475;PB.26121.7|m.34259;PB.2628.15|m.76320;PB.28249.1|m.7777;PB.28249.3|m.20152;PB.28249.5|m.121741;PB.28249.6|m.202381;PB.30211.3|m.194672;PB.31634.1|m.133439;PB.3399.4|m.17191;PB.35393.3|m.52876;PB.36238.4|m.198460;PB.38657.1|m.9359;PB.39547.2|m.112930;PB.40409.3|m.99138;PB.41818.4|m.101065;PB.42499.5|m.12…	K09753+K13065+K00430+K00083+K06892+K05350+K00588+K05349+K01904+K12355+K13068+K01188+K18368+K10775
Galactose metabolism	65 (1.32%)	ko00052	PB.1318.33|m.118755;PB.13568.15|m.149604;PB.16660.12|m.105278;PB.16660.1|m.2308;PB.16660.2|m.8196;PB.17609.3|m.110751;PB.18157.2|m.161201;PB.18773.1|m.144285;PB.1878.6|m.104960;PB.19185.2|m.14070;PB.20524.1|m.30707;PB.21895.4|m.168657;PB.22952.7|m.128864;PB.23132.1|m.30726;PB.24149.19|m.110922;PB.24149.1|m.3557;PB.24149.2|m.4751;PB.25813.1|m.20845;PB.25813.3|m.30630;PB.25813.5|m.138552;PB.25825.1…	K12309+K12447+K01835+K00844+K01187+K00963+K00850+K07407+K01193+K01784+K01785+K00011+K00965+K01190
Valine, leucine and isoleucine degradation	58 (1.18%)	ko00280	PB.1031.8|m.86516;PB.10858.1|m.2528;PB.10858.4|m.12198;PB.13040.2|m.17266;PB.21423.1|m.8827;PB.21423.3|m.147114;PB.21614.10|m.147438;PB.21827.1|m.99906;PB.21827.2|m.101663;PB.23273.10|m.79790;PB.23273.11|m.83738;PB.27518.1|m.23723;PB.27518.2|m.115592;PB.30552.7|m.90567;PB.30552.8|m.129642;PB.30584.1|m.133912;PB.31774.1|m.329;PB.3216.13|m.166148;PB.3216.15|m.181604;PB.36504.4|m.56681;PB.3766.29|m.…	K18660+K00128+K09699+K00382+K00249+K00626+K01968+K05605+K00020+K00827+K00826+K07513+K14085+K00140+K01969+K01640+K00253+K05607
Propanoate metabolism	57 (1.16%)	ko00640	PB.10035.2|m.16597;PB.10443.1|m.160680;PB.13040.2|m.17266;PB.16471.3|m.42760;PB.17792.13|m.85858;PB.17792.6|m.15916;PB.19375.10|m.144625;PB.19375.9|m.125488;PB.21180.4|m.111071;PB.21423.1|m.8827;PB.21423.3|m.147114;PB.21614.10|m.147438;PB.23273.10|m.79790;PB.23273.11|m.83738;PB.3041.16|m.197513;PB.30584.1|m.133912;PB.30650.1|m.140720;PB.31774.1|m.329;PB.40143.2|m.15020;PB.4032.9|m.97077;PB.4248.1…	K11262+K09699+K02160+K01961+K01962+K01895+K00382+K00249+K00626+K05605+K00140+K01900+K00016+K01899+K01963
Pentose and glucuronate interconversions	55 (1.12%)	ko00040	PB.11896.13|m.120460;PB.15747.3|m.9044;PB.16415.1|m.7821;PB.16660.12|m.105278;PB.16660.1|m.2308;PB.16660.2|m.8196;PB.18820.10|m.156325;PB.18820.1|m.582;PB.18820.5|m.16339;PB.21828.9|m.107007;PB.24262.2|m.86392;PB.26390.1|m.92758;PB.28583.1|m.8190;PB.34595.1|m.30086;PB.35357.3|m.207849;PB.35705.2|m.88933;PB.37599.1|m.3508;PB.37599.2|m.4615;PB.41889.1|m.18938;PB.41895.6|m.180788;PB.42567.11|m.10293…	K01051+K00012+K00875+K12447+K01184+K01213+K00963+K01783+K00854+K01805+K17743+K00002+K00008+K16190+K00011
Alanine, aspartate and glutamate metabolism	55 (1.12%)	ko00250	PB.11686.2|m.15418;PB.1283.21|m.47224;PB.13195.6|m.65766;PB.1349.2|m.13984;PB.17679.1|m.15844;PB.26396.1|m.136700;PB.27042.1|m.137097;PB.2753.8|m.182096;PB.30556.3|m.107199;PB.30704.8|m.190216;PB.30724.2|m.48798;PB.32070.7|m.79272;PB.32233.13|m.90899;PB.36504.4|m.56681;PB.36580.10|m.44289;PB.36580.14|m.54203;PB.36580.25|m.209234;PB.38190.1|m.108126;PB.38694.10|m.118288;PB.38694.5|m.96051;PB.388.3…	K14272+K01953+K01915+K16871+K00294+K00262+K00264+K00820+K17761+K00830+K01580+K00827+K01955+K01756+K00814+K01755+K00261+K01956+K00811+K01939+K14454+K00609+K14455+K01940+K13566
Fatty acid biosynthesis	54 (1.1%)	ko00061	PB.10035.2|m.16597;PB.10443.1|m.160680;PB.16471.3|m.42760;PB.17792.13|m.85858;PB.17792.6|m.15916;PB.19375.10|m.144625;PB.19375.9|m.125488;PB.20197.1|m.10202;PB.2196.10|m.126437;PB.23296.1|m.15393;PB.24043.1|m.23695;PB.24043.5|m.130600;PB.24415.8|m.139556;PB.25829.4|m.133295;PB.27040.5|m.53241;PB.3041.16|m.197513;PB.30650.1|m.140720;PB.31667.7|m.73386;PB.38451.1|m.16437;PB.39530.1|m.89856;PB.41740…	K11262+K02160+K01961+K01962+K09458+K01897+K00648+K00208+K10781+K00645+K03921+K00059+K01963+K02372
Fatty acid degradation	53 (1.08%)	ko00071	PB.10858.1|m.2528;PB.10858.4|m.12198;PB.18896.6|m.144694;PB.1898.1|m.1641;PB.1898.2|m.2271;PB.1898.42|m.222144;PB.19982.1|m.8594;PB.21089.11|m.83005;PB.21089.2|m.13556;PB.21089.7|m.58562;PB.21614.10|m.147438;PB.21827.1|m.99906;PB.21827.2|m.101663;PB.2196.10|m.126437;PB.2275.15|m.112096;PB.2275.19|m.113215;PB.23273.10|m.79790;PB.23273.11|m.83738;PB.23296.1|m.15393;PB.24043.1|m.23695;PB.24043.5|m.1…	K00128+K10527+K18857+K00232+K00121+K00249+K01897+K00626+K07513+K14085+K00001
Glycerophospholipid metabolism	50 (1.02%)	ko00564	PB.11077.1|m.161771;PB.11683.1|m.40157;PB.12458.1|m.16888;PB.12876.7|m.144251;PB.13040.2|m.17266;PB.15529.1|m.165685;PB.1685.35|m.142485;PB.17119.2|m.133653;PB.18782.1|m.163019;PB.20352.11|m.152633;PB.22287.1|m.161170;PB.2281.15|m.30387;PB.2281.17|m.31957;PB.23279.1|m.31693;PB.23937.1|m.145275;PB.24255.1|m.6416;PB.27135.7|m.128812;PB.27161.1|m.131799;PB.30282.2|m.16737;PB.30821.8|m.66042;PB.31782…	K00999+K18693+K00901+K14674+K00655+K13510+K01126+K01115+K01613+K13523+K00111+K08744+K06130+K18696+K13519+K00981+K00967+K16860+K16818+K01114+K14156+K01517+K00968
Ribosome biogenesis in eukaryotes	49 (1%)	ko03008	PB.11749.11|m.43617;PB.11749.30|m.82347;PB.1337.12|m.218659;PB.14992.1|m.75450;PB.1575.11|m.35213;PB.1575.7|m.25504;PB.1785.13|m.102014;PB.18550.4|m.188528;PB.1907.22|m.64003;PB.1922.10|m.68299;PB.1922.14|m.131171;PB.1922.21|m.180104;PB.20183.2|m.83088;PB.23322.5|m.59507;PB.2606.10|m.52995;PB.27511.1|m.36848;PB.27625.6|m.110416;PB.30006.5|m.164300;PB.3379.1|m.961;PB.34616.7|m.83496;PB.38693.15|m.…	K03097+K14556+K14564+K14290+K12619+K14538+K14568+K14536+K14573+K03115+K07936+K14563+K07562+K14574+K14558+K14521+K14525+K11131+K14550+K03539+K14565+K03264+K14555+K11128+K11129+K06943
Ascorbate and aldarate metabolism	48 (0.98%)	ko00053	PB.10858.1|m.2528;PB.10858.4|m.12198;PB.15747.3|m.9044;PB.16660.12|m.105278;PB.16660.1|m.2308;PB.16660.2|m.8196;PB.18820.10|m.156325;PB.18820.1|m.582;PB.18820.5|m.16339;PB.21827.1|m.99906;PB.21827.2|m.101663;PB.21828.9|m.107007;PB.25432.1|m.9875;PB.25432.2|m.12048;PB.26443.6|m.206394;PB.29042.3|m.7860;PB.29508.4|m.63349;PB.30552.7|m.90567;PB.30552.8|m.129642;PB.32974.2|m.105430;PB.32974.3|m.11990…	K00128+K00012+K12447+K17744+K21888+K10046+K10047+K00225+K08232+K14085+K00434+K18649+K16190
Arginine and proline metabolism	45 (0.92%)	ko00330	PB.10858.1|m.2528;PB.10858.4|m.12198;PB.13481.3|m.80385;PB.17679.1|m.15844;PB.21827.1|m.99906;PB.21827.2|m.101663;PB.23381.5|m.135865;PB.24506.1|m.54023;PB.25648.4|m.117193;PB.27156.1|m.25468;PB.30552.7|m.90567;PB.30552.8|m.129642;PB.31669.2|m.17548;PB.32630.1|m.15757;PB.32630.3|m.83666;PB.36101.3|m.114083;PB.39818.2|m.13434;PB.39818.4|m.14531;PB.40241.3|m.96210;PB.41128.3|m.89478;PB.41128.3|m.89…	K00128+K00819+K00294+K12657+K00797+K01426+K14085+K10536+K00811+K14329+K14454+K14455+K01476+K00472+K01259+K00286+K12251
Glycerolipid metabolism	45 (0.92%)	ko00561	PB.10858.1|m.2528;PB.10858.4|m.12198;PB.11683.1|m.40157;PB.12458.1|m.16888;PB.12876.7|m.144251;PB.13040.2|m.17266;PB.16415.1|m.7821;PB.1705.6|m.219775;PB.21827.1|m.99906;PB.21827.2|m.101663;PB.24255.1|m.6416;PB.2586.6|m.92631;PB.30282.2|m.16737;PB.30552.7|m.90567;PB.30552.8|m.129642;PB.31782.5|m.97088;PB.35497.2|m.67313;PB.36488.7|m.88696;PB.38875.1|m.11037;PB.38875.8|m.126187;PB.39818.2|m.13434;…	K00128+K18693+K00901+K14674+K00655+K00864+K00679+K13523+K00863+K07407+K06118+K14085+K13519+K00002+K15918+K00011+K01054
Tryptophan metabolism	42 (0.86%)	ko00380	PB.10858.1|m.2528;PB.10858.4|m.12198;PB.1119.4|m.25078;PB.16211.4|m.184886;PB.21827.1|m.99906;PB.21827.2|m.101663;PB.23273.10|m.79790;PB.23273.11|m.83738;PB.25909.1|m.50550;PB.30552.7|m.90567;PB.30552.8|m.129642;PB.31669.2|m.17548;PB.31774.1|m.329;PB.32630.1|m.15757;PB.32630.3|m.83666;PB.36101.3|m.114083;PB.38748.2|m.14185;PB.39818.2|m.13434;PB.39818.4|m.14531;PB.40713.5|m.96101;PB.42527.15|m.933…	K00128+K00164+K07409+K00626+K01426+K16903+K14085+K03781+K22588+K00816+K11816
Arginine biosynthesis	40 (0.81%)	ko00220	PB.10467.11|m.93577;PB.10467.9|m.82667;PB.11686.2|m.15418;PB.13195.6|m.65766;PB.14250.2|m.52736;PB.21039.9|m.156260;PB.26396.1|m.136700;PB.27042.1|m.137097;PB.32767.2|m.15269;PB.36447.2|m.123597;PB.38190.1|m.108126;PB.40297.7|m.94086;PB.42630.7|m.90007;PB.42810.2|m.15282;PB.42985.3|m.83207;PB.43085.3|m.77317;PB.43150.4|m.87342;PB.43344.12|m.80366;PB.43344.1|m.2240;PB.43884.1|m.5947;PB.43884.2|m.1…	K00145+K14272+K01915+K00611+K01427+K00262+K01438+K14677+K00814+K01755+K00261+K00818+K00811+K14454+K14455+K00620+K01940+K00930+K01476
Tyrosine metabolism	40 (0.81%)	ko00350	PB.149.2|m.9304;PB.149.7|m.20319;PB.1898.1|m.1641;PB.1898.2|m.2271;PB.1898.42|m.222144;PB.21089.11|m.83005;PB.21089.2|m.13556;PB.21089.7|m.58562;PB.26019.9|m.96145;PB.28004.2|m.7952;PB.30415.1|m.132836;PB.38704.1|m.77922;PB.404.32|m.123807;PB.41171.4|m.39788;PB.41171.5|m.51062;PB.42019.1|m.97994;PB.42973.2|m.66568;PB.43344.12|m.80366;PB.43344.1|m.2240;PB.44042.1|m.4767;PB.44448.2|m.3505;PB.44448.…	K00276+K18857+K00121+K01555+K00817+K07253+K15849+K00001+K00457+K00811+K00815+K14454+K14455+K00451+K02510+K01800+K01557
Plant hormone signal transduction	40 (0.81%)	ko04075	PB.10092.29|m.95867;PB.11531.10|m.213331;PB.11531.2|m.7742;PB.1289.8|m.114641;PB.19740.10|m.123220;PB.23931.9|m.146011;PB.254.4|m.150526;PB.25845.2|m.101720;PB.25856.9|m.194720;PB.26693.13|m.190511;PB.27642.1|m.128351;PB.29040.1|m.8108;PB.36267.1|m.100737;PB.37245.1|m.109722;PB.37354.2|m.100954;PB.42432.3|m.82178;PB.476.11|m.203307;PB.47696.9|m.80125;PB.47983.4|m.16227;PB.48404.5|m.66172;PB.48660…	K14498+K13413+K14485+K14491+K14494+K13422+K14431+K14504+K13463+K14500+K14486+K14512+K14496+K14488+K14497+K14493+K13464+K14490
Phenylalanine, tyrosine and tryptophan biosynthesis	40 (0.81%)	ko00400	PB.11162.1|m.168078;PB.15365.1|m.950;PB.15365.3|m.20684;PB.26649.1|m.129629;PB.30415.1|m.132836;PB.33467.4|m.36286;PB.35091.1|m.104397;PB.39317.2|m.215212;PB.40112.5|m.93828;PB.40374.5|m.112728;PB.41171.4|m.39788;PB.41171.5|m.51062;PB.41805.1|m.66713;PB.42522.2|m.102443;PB.42723.2|m.17343;PB.42723.4|m.52503;PB.43344.12|m.80366;PB.43344.1|m.2240;PB.44042.1|m.4767;PB.44401.3|m.76499;PB.44401.4|m.89…	K01626+K00800+K13832+K00817+K01657+K00766+K01736+K15849+K00811+K00815+K06001+K14454+K14455+K01695+K01696+K01735+K01609+K15227+K01850+K01658
Inositol phosphate metabolism	39 (0.79%)	ko00562	PB.11077.1|m.161771;PB.11587.10|m.186208;PB.15031.3|m.152839;PB.19349.11|m.49466;PB.20979.4|m.157979;PB.22011.2|m.11935;PB.22011.9|m.145780;PB.25179.1|m.131097;PB.2594.6|m.110220;PB.29444.1|m.142707;PB.29508.4|m.63349;PB.31686.20|m.130981;PB.32046.2|m.118910;PB.33230.1|m.4034;PB.36968.5|m.104367;PB.40143.2|m.15020;PB.40390.10|m.212547;PB.42558.16|m.91017;PB.44959.1|m.23838;PB.47027.5|m.84966;PB.4…	K00999+K01858+K03103+K01803+K00914+K15422+K00888+K10047+K05857+K00921+K00140+K10572+K00913+K01114+K01765+K18649+K01110+K01092+K00010+K01099+K20279
alpha-Linolenic acid metabolism	38 (0.77%)	ko00592	PB.12876.7|m.144251;PB.17493.5|m.103041;PB.18896.6|m.144694;PB.1898.1|m.1641;PB.1898.2|m.2271;PB.1898.42|m.222144;PB.19745.2|m.3349;PB.19982.1|m.8594;PB.2275.15|m.112096;PB.2275.19|m.113215;PB.2547.27|m.142413;PB.2547.3|m.14781;PB.2547.6|m.24027;PB.2672.14|m.134351;PB.28004.2|m.7952;PB.28291.7|m.96450;PB.28871.1|m.112930;PB.33929.1|m.125970;PB.39376.4|m.14865;PB.39376.9|m.79018;PB.41160.1|m.14876…	K14674+K00454+K10527+K18857+K10528+K00232+K07513+K10526+K01723+K16818+K05894+K10525
Phenylalanine metabolism	37 (0.75%)	ko00360	PB.149.2|m.9304;PB.149.7|m.20319;PB.30211.3|m.194672;PB.30415.1|m.132836;PB.31669.2|m.17548;PB.32630.1|m.15757;PB.32630.3|m.83666;PB.36101.3|m.114083;PB.38704.1|m.77922;PB.39547.2|m.112930;PB.404.32|m.123807;PB.40409.3|m.99138;PB.41171.4|m.39788;PB.41171.5|m.51062;PB.42973.2|m.66568;PB.43344.12|m.80366;PB.43344.1|m.2240;PB.44042.1|m.4767;PB.44448.2|m.3505;PB.44448.3|m.6035;PB.44522.12|m.94074;PB.…	K00276+K00588+K00817+K01426+K07253+K01904+K15849+K00457+K00811+K00815+K14454+K14455+K10775
Nucleotide excision repair	35 (0.71%)	ko03420	PB.12780.4|m.72672;PB.13904.1|m.140584;PB.14590.1|m.161504;PB.16838.1|m.145320;PB.19317.15|m.112449;PB.19317.1|m.4975;PB.19317.2|m.14579;PB.19317.3|m.15233;PB.21966.5|m.144277;PB.3118.22|m.94670;PB.45825.1|m.931;PB.4714.13|m.37795;PB.4714.26|m.161024;PB.4714.53|m.182599;PB.48257.6|m.97005;PB.49158.4|m.93538;PB.5289.3|m.222162;PB.53446.4|m.216243;PB.55712.1|m.65578;PB.56154.10|m.211898;PB.56154.1|…	K10754+K07466+K10838+K10747+K10839+K10756+K06634+K10610+K10755+K04802+K10609+K03868+K02326
Lysine degradation	35 (0.71%)	ko00310	PB.10858.1|m.2528;PB.10858.4|m.12198;PB.1119.4|m.25078;PB.12383.6|m.107430;PB.21827.1|m.99906;PB.21827.2|m.101663;PB.23273.10|m.79790;PB.23273.11|m.83738;PB.249.3|m.20246;PB.28397.3|m.137867;PB.30552.7|m.90567;PB.30552.8|m.129642;PB.31774.1|m.329;PB.39787.1|m.74517;PB.39818.2|m.13434;PB.39818.4|m.14531;PB.40686.10|m.88218;PB.40686.14|m.105076;PB.42722.2|m.8176;PB.42722.4|m.66753;PB.44227.1|m.8141…	K00128+K00164+K14157+K00626+K11420+K00658+K19199+K14085+K00306+K11433
Pantothenate and CoA biosynthesis	33 (0.67%)	ko00770	PB.11411.7|m.30873;PB.13830.13|m.118748;PB.13830.3|m.14900;PB.13838.19|m.77259;PB.13838.26|m.100410;PB.13838.33|m.113765;PB.15428.3|m.22993;PB.1948.11|m.113208;PB.19904.5|m.145516;PB.22580.2|m.13444;PB.23152.5|m.88437;PB.2731.11|m.21803;PB.2731.2|m.3238;PB.2731.3|m.5257;PB.34989.2|m.122318;PB.3766.29|m.179626;PB.37868.2|m.38651;PB.44180.2|m.16286;PB.44583.1|m.66668;PB.44596.9|m.80703;PB.45933.2|m…	K01652+K00053+K09680+K00207+K01653+K01687+K01598+K00826+K01431+K01464+K01513+K00606+K01922+K01918+K00859+K02201
Other glycan degradation	32 (0.65%)	ko00511	PB.1318.33|m.118755;PB.13568.15|m.149604;PB.17609.3|m.110751;PB.18157.2|m.161201;PB.18773.1|m.144285;PB.19692.1|m.16007;PB.19692.9|m.165126;PB.20524.1|m.30707;PB.21895.4|m.168657;PB.22952.7|m.128864;PB.2456.11|m.156624;PB.25825.1|m.146344;PB.29371.1|m.117691;PB.313.5|m.31909;PB.31985.1|m.128861;PB.31985.1|m.128862;PB.368.15|m.155114;PB.368.1|m.11656;PB.3809.7|m.116717;PB.39467.7|m.177491;PB.40278…	K12309+K15923+K17108+K01227+K01206+K01191+K12373+K01444+K01190
Cyanoamino acid metabolism	32 (0.65%)	ko00460	PB.18245.2|m.147407;PB.20293.2|m.120167;PB.2628.15|m.76320;PB.28129.2|m.135996;PB.31634.1|m.133439;PB.3399.4|m.17191;PB.35771.6|m.191323;PB.38657.1|m.9359;PB.39850.15|m.95446;PB.39850.4|m.16953;PB.39850.9|m.44449;PB.40309.3|m.18193;PB.41818.4|m.101065;PB.42473.2|m.84276;PB.42499.5|m.121570;PB.42903.1|m.95667;PB.48698.5|m.72216;PB.49931.5|m.48981;PB.50249.3|m.207514;PB.56059.4|m.40772;PB.56059.5|m…	K01455+K18592+K05350+K00600+K05349+K13035+K13034+K01188+K20802
Selenocompound metabolism	31 (0.63%)	ko00450	PB.10971.1|m.180825;PB.11411.7|m.30873;PB.1600.2|m.216800;PB.184.37|m.141402;PB.184.40|m.149204;PB.1920.5|m.211412;PB.2147.11|m.30272;PB.2147.35|m.149220;PB.2249.2|m.14087;PB.22557.1|m.155072;PB.25485.1|m.167993;PB.26425.1|m.143159;PB.26539.1|m.127406;PB.3480.35|m.150122;PB.35240.1|m.102559;PB.3550.2|m.21653;PB.3550.31|m.176995;PB.3561.5|m.29744;PB.35684.8|m.90495;PB.43620.2|m.97691;PB.43720.3|m.…	K00549+K01874+K11717+K08247+K01739+K00384+K13811+K01760+K00816
One carbon pool by folate	31 (0.63%)	ko00670	PB.10476.6|m.42389;PB.16923.22|m.112269;PB.16923.3|m.11718;PB.19236.3|m.106537;PB.28129.2|m.135996;PB.30077.1|m.22866;PB.32777.1|m.139263;PB.33960.5|m.128054;PB.35771.6|m.191323;PB.36475.1|m.9411;PB.38705.2|m.12039;PB.39850.15|m.95446;PB.39850.4|m.16953;PB.39850.9|m.44449;PB.40309.3|m.18193;PB.42903.1|m.95667;PB.46884.5|m.64693;PB.46884.8|m.73272;PB.46884.9|m.76473;PB.51311.1|m.586;PB.52570.1|m.1…	K00297+K00602+K01938+K00600+K13998+K00288+K00605+K00601+K01934
Porphyrin and chlorophyll metabolism	29 (0.59%)	ko00860	PB.24486.2|m.15254;PB.24486.4|m.29027;PB.25071.1|m.149109;PB.31503.5|m.194921;PB.32559.1|m.123766;PB.34453.4|m.105795;PB.35298.1|m.94711;PB.35712.4|m.38394;PB.41884.3|m.51742;PB.41884.7|m.90503;PB.41958.7|m.205219;PB.41984.4|m.64461;PB.42137.3|m.58054;PB.42137.4|m.104006;PB.43618.10|m.86354;PB.43618.5|m.35300;PB.44552.1|m.84499;PB.45239.1|m.89466;PB.45863.1|m.8318;PB.47176.1|m.80313;PB.47623.9|m.…	K01885+K03794+K01599+K00231+K01698+K04035+K01772+K01845+K13606+K21480+K03405+K00228+K01749+K13071+K19073+K19054
beta-Alanine metabolism	29 (0.59%)	ko00410	PB.10858.1|m.2528;PB.10858.4|m.12198;PB.149.2|m.9304;PB.149.7|m.20319;PB.21614.10|m.147438;PB.21827.1|m.99906;PB.21827.2|m.101663;PB.22580.2|m.13444;PB.24506.1|m.54023;PB.30552.7|m.90567;PB.30552.8|m.129642;PB.30584.1|m.133912;PB.32233.13|m.90899;PB.39818.2|m.13434;PB.39818.4|m.14531;PB.40143.2|m.15020;PB.404.32|m.123807;PB.42722.2|m.8176;PB.42722.4|m.66753;PB.43036.1|m.29709;PB.43581.1|m.83621;P…	K00128+K00276+K00249+K00207+K00797+K05605+K01580+K14085+K00140+K01431+K01464+K01918
Valine, leucine and isoleucine biosynthesis	29 (0.59%)	ko00290	PB.11411.7|m.30873;PB.13830.13|m.118748;PB.13830.3|m.14900;PB.13838.19|m.77259;PB.13838.26|m.100410;PB.13838.33|m.113765;PB.15428.3|m.22993;PB.19220.11|m.135492;PB.19904.5|m.145516;PB.23152.5|m.88437;PB.2731.11|m.21803;PB.2731.2|m.3238;PB.2731.3|m.5257;PB.27970.5|m.22615;PB.27970.7|m.43017;PB.35645.8|m.97467;PB.35645.9|m.101425;PB.3766.29|m.179626;PB.37868.2|m.38651;PB.39177.1|m.118498;PB.48083.1…	K01652+K00053+K01649+K01653+K01687+K01703+K00826+K00052+K01704+K01754
Phosphatidylinositol signaling system	28 (0.57%)	ko04070	PB.11077.1|m.161771;PB.12458.1|m.16888;PB.20979.4|m.157979;PB.22011.2|m.11935;PB.22011.9|m.145780;PB.2594.6|m.110220;PB.29508.4|m.63349;PB.31782.5|m.97088;PB.32046.2|m.118910;PB.33230.1|m.4034;PB.36968.5|m.104367;PB.42558.16|m.91017;PB.42980.3|m.74836;PB.47027.5|m.84966;PB.4965.1|m.201608;PB.51183.1|m.13707;PB.5177.4|m.108638;PB.52914.4|m.47288;PB.52914.5|m.51090;PB.53893.1|m.38788;PB.54208.1|m.8…	K00999+K00901+K00914+K15422+K00888+K10047+K05857+K00921+K10572+K00981+K00913+K18649+K01110+K01092+K01099+K20279+K02183
Flavonoid biosynthesis	27 (0.55%)	ko00941	PB.11839.1|m.14289;PB.22637.8|m.53223;PB.25798.5|m.49914;PB.30211.3|m.194672;PB.3977.15|m.111790;PB.40409.3|m.99138;PB.43887.2|m.13324;PB.44995.1|m.81991;PB.45019.3|m.12544;PB.45714.2|m.16167;PB.47630.2|m.12577;PB.49138.1|m.15898;PB.51079.1|m.6837;PB.51703.1|m.50977;PB.53052.7|m.58360;PB.54154.3|m.45853;PB.56905.8|m.197280;PB.58004.1|m.63375;PB.59710.1|m.36129;PB.61056.2|m.182311;PB.62041.1|m.456…	K13065+K13081+K01859+K00588+K00660+K05277+K05278
N-Glycan biosynthesis	27 (0.55%)	ko00510	PB.16287.15|m.148654;PB.16287.17|m.159098;PB.1644.27|m.90349;PB.17587.2|m.127373;PB.1797.14|m.111330;PB.21547.11|m.158620;PB.23137.7|m.118314;PB.28733.4|m.100237;PB.3157.1|m.219604;PB.337.2|m.15400;PB.36132.1|m.121042;PB.38177.2|m.16448;PB.42063.1|m.97734;PB.43252.2|m.105876;PB.43905.11|m.207279;PB.441.2|m.6709;PB.45677.1|m.90900;PB.45915.1|m.62824;PB.46032.18|m.197559;PB.46032.1|m.1418;PB.5079.1…	K05546+K07151+K01228+K12667+K00729+K12666+K01230+K03846+K00726+K12668+K01001+K12670+K03844+K01231+K12669
Carotenoid biosynthesis	26 (0.53%)	ko00906	PB.18786.3|m.143207;PB.21982.1|m.144989;PB.2768.1|m.26936;PB.27870.4|m.189664;PB.31555.11|m.91040;PB.32579.3|m.87393;PB.32620.10|m.106564;PB.33346.1|m.4438;PB.36544.2|m.44163;PB.42358.1|m.34310;PB.43019.1|m.94163;PB.43548.7|m.183601;PB.43648.2|m.95019;PB.44949.1|m.81798;PB.46117.3|m.90341;PB.46757.1|m.70773;PB.46802.1|m.80066;PB.49351.2|m.3630;PB.54649.1|m.6645;PB.56283.2|m.21835;PB.57483.10|m.20…	K09838+K09842+K09837+K15747+K09835+K00514+K02293+K09841+K14595+K09843+K09839
Sphingolipid metabolism	25 (0.51%)	ko00600	PB.1318.33|m.118755;PB.13568.15|m.149604;PB.17609.3|m.110751;PB.18157.2|m.161201;PB.18773.1|m.144285;PB.20524.1|m.30707;PB.21895.4|m.168657;PB.22952.7|m.128864;PB.2456.11|m.156624;PB.25825.1|m.146344;PB.3020.11|m.109636;PB.3020.8|m.71711;PB.3020.9|m.111162;PB.313.5|m.31909;PB.35497.2|m.67313;PB.38875.1|m.11037;PB.38875.8|m.126187;PB.412.12|m.219092;PB.49168.2|m.15993;PB.49470.1|m.77972;PB.49820.1…	K12309+K17108+K12349+K07407+K04628+K04711+K04708+K04718+K04715+K01190
Stilbenoid, diarylheptanoid and gingerol biosynthesis	25 (0.51%)	ko00945	PB.11021.13|m.186186;PB.11839.1|m.14289;PB.21980.25|m.66273;PB.27509.1|m.133007;PB.27880.10|m.35931;PB.27880.3|m.8330;PB.30211.3|m.194672;PB.31260.9|m.52308;PB.40409.3|m.99138;PB.43887.2|m.13324;PB.44899.1|m.6142;PB.44899.2|m.23660;PB.44899.6|m.75488;PB.44899.8|m.88961;PB.45714.2|m.16167;PB.47975.4|m.51259;PB.47975.8|m.87802;PB.51344.2|m.64994;PB.52292.2|m.12316;PB.53249.2|m.204073;PB.63047.1|m.2…	K16040+K13065+K00588
Protein export	24 (0.49%)	ko03060	PB.13023.25|m.101352;PB.1589.2|m.3706;PB.253.57|m.166334;PB.26605.4|m.45076;PB.26605.5|m.45829;PB.27900.4|m.126226;PB.27918.11|m.157615;PB.3148.7|m.44003;PB.32954.12|m.135459;PB.32954.1|m.936;PB.32954.7|m.93846;PB.41544.1|m.16909;PB.47188.7|m.179849;PB.56870.1|m.56994;PB.58546.2|m.76139;PB.5898.2|m.90815;PB.62226.5|m.196188;PB.63991.1|m.24877;PB.68748.3|m.195363;PB.68748.4|m.196436;PB.69885.1|m.2…	K10956+K09490+K12272+K03108+K09540+K13431+K03107+K03106+K03110+K12948+K03070+K09647+K12947+K03105+K13280+K09481+K03116
Tropane, piperidine and pyridine alkaloid biosynthesis	23 (0.47%)	ko00960	PB.149.2|m.9304;PB.149.7|m.20319;PB.25223.2|m.198425;PB.30415.1|m.132836;PB.404.32|m.123807;PB.41171.4|m.39788;PB.41171.5|m.51062;PB.43344.12|m.80366;PB.43344.1|m.2240;PB.44042.1|m.4767;PB.44448.2|m.3505;PB.44448.3|m.6035;PB.44522.12|m.94074;PB.44522.1|m.2375;PB.44522.5|m.11914;PB.44522.9|m.65844;PB.44943.1|m.1612;PB.45484.1|m.3572;PB.45484.3|m.7231;PB.45484.5|m.14268;PB.56743.3|m.56722;PB.58023.…	K00276+K08081+K00817+K15849+K00811+K00815+K14454+K14455
Butanoate metabolism	23 (0.47%)	ko00650	PB.11411.7|m.30873;PB.1349.2|m.13984;PB.13830.13|m.118748;PB.13830.3|m.14900;PB.15428.3|m.22993;PB.19904.5|m.145516;PB.23152.5|m.88437;PB.23273.10|m.79790;PB.23273.11|m.83738;PB.30704.8|m.190216;PB.31774.1|m.329;PB.32233.13|m.90899;PB.37868.2|m.38651;PB.4106.9|m.95036;PB.41547.6|m.82180;PB.44883.1|m.86922;PB.47338.2|m.72156;PB.48032.1|m.6829;PB.50021.1|m.8547;PB.55026.2|m.57121;PB.57273.1|m.11631…	K01652+K16871+K01653+K00626+K17761+K01580+K00109+K01640+K18121
DNA replication	23 (0.47%)	ko03030	PB.1061.20|m.192804;PB.12689.1|m.175124;PB.12780.4|m.72672;PB.13904.1|m.140584;PB.16838.1|m.145320;PB.21966.5|m.144277;PB.26740.5|m.130272;PB.3118.22|m.94670;PB.41939.1|m.106236;PB.5289.3|m.222162;PB.53446.4|m.216243;PB.55712.1|m.65578;PB.56154.10|m.211898;PB.56154.1|m.16712;PB.57184.1|m.54335;PB.63616.1|m.184092;PB.63993.2|m.35343;PB.65356.1|m.211026;PB.67221.4|m.186365;PB.69029.3|m.184459;PB.73…	K02209+K02685+K10754+K07466+K10747+K10756+K02321+K02212+K10755+K04802+K02326
Biosynthesis of unsaturated fatty acids	22 (0.45%)	ko01040	PB.19982.1|m.8594;PB.2275.15|m.112096;PB.2275.19|m.113215;PB.2672.14|m.134351;PB.27648.1|m.38250;PB.33929.1|m.125970;PB.39376.4|m.14865;PB.39376.9|m.79018;PB.41685.5|m.49245;PB.42947.14|m.89366;PB.43693.2|m.8926;PB.45876.2|m.85911;PB.46583.2|m.53222;PB.47307.7|m.8331;PB.47655.5|m.210654;PB.49890.1|m.86704;PB.54793.3|m.65690;PB.56024.1|m.12016;PB.56068.1|m.48429;PB.57352.4|m.202716;PB.64207.1|m.21…	K00232+K10258+K07513+K10251+K01068+K03921+K00059+K10703
Isoquinoline alkaloid biosynthesis	22 (0.45%)	ko00950	PB.149.2|m.9304;PB.149.7|m.20319;PB.404.32|m.123807;PB.40409.3|m.99138;PB.41171.4|m.39788;PB.41171.5|m.51062;PB.43344.12|m.80366;PB.43344.1|m.2240;PB.44042.1|m.4767;PB.44448.2|m.3505;PB.44448.3|m.6035;PB.44522.12|m.94074;PB.44522.1|m.2375;PB.44522.5|m.11914;PB.44522.9|m.65844;PB.44943.1|m.1612;PB.45484.1|m.3572;PB.45484.3|m.7231;PB.45484.5|m.14268;PB.64326.1|m.31890;PB.65848.1|m.209507;PB.69888.1…	K00276+K21311+K15849+K00811+K00815+K14454+K14455
Sulfur metabolism	22 (0.45%)	ko00920	PB.1485.16|m.119165;PB.1485.23|m.137889;PB.14949.1|m.156913;PB.15854.10|m.133143;PB.22011.2|m.11935;PB.22011.9|m.145780;PB.23434.10|m.36803;PB.23434.2|m.2985;PB.23434.4|m.9254;PB.30559.1|m.3556;PB.35684.8|m.90495;PB.40011.1|m.37088;PB.43720.3|m.58949;PB.47020.1|m.13975;PB.48698.5|m.72216;PB.50542.2|m.9936;PB.50560.2|m.88239;PB.54532.2|m.69672;PB.54999.8|m.218148;PB.59892.1|m.37769;PB.63188.1|m.39…	K00392+K01738+K15422+K01011+K01739+K00387+K13811+K13034+K00640+K17725+K01082
Mismatch repair	22 (0.45%)	ko03430	PB.12780.4|m.72672;PB.13904.1|m.140584;PB.16838.1|m.145320;PB.21966.5|m.144277;PB.2706.19|m.191183;PB.27070.7|m.141634;PB.3118.22|m.94670;PB.3950.1|m.43931;PB.41130.9|m.103892;PB.5289.3|m.222162;PB.53446.4|m.216243;PB.55712.1|m.65578;PB.56154.10|m.211898;PB.56154.1|m.16712;PB.57184.1|m.54335;PB.63616.1|m.184092;PB.65356.1|m.211026;PB.67221.4|m.186365;PB.69029.3|m.184459;PB.73206.1|m.187474;PB.733…	K10754+K07466+K10747+K10756+K08739+K08734+K08735+K07456+K10755+K04802
Terpenoid backbone biosynthesis	22 (0.45%)	ko00900	PB.11695.8|m.144185;PB.1221.5|m.47515;PB.14384.2|m.105268;PB.23083.2|m.12804;PB.23273.10|m.79790;PB.23273.11|m.83738;PB.24840.3|m.25159;PB.31774.1|m.329;PB.35072.1|m.124046;PB.35760.4|m.43369;PB.37519.1|m.38478;PB.38775.1|m.811;PB.42287.6|m.90149;PB.42808.1|m.2630;PB.42808.4|m.61626;PB.43319.1|m.88524;PB.46506.8|m.38783;PB.49221.3|m.23824;PB.53939.2|m.9795;PB.53939.7|m.61370;PB.60634.1|m.58527;PB…	K01823+K00787+K00099+K01597+K00626+K03526+K11778+K00919+K05955+K13789+K00938+K05954+K05906+K00869+K00991
Arachidonic acid metabolism	21 (0.43%)	ko00590	PB.12876.7|m.144251;PB.16211.4|m.184886;PB.19380.1|m.37507;PB.20293.2|m.120167;PB.39330.5|m.95326;PB.46001.3|m.80334;PB.48344.4|m.216442;PB.51447.11|m.194977;PB.52086.3|m.54497;PB.52086.4|m.54655;PB.56300.2|m.29669;PB.56364.1|m.31755;PB.58569.1|m.41343;PB.61643.2|m.30146;PB.64569.1|m.64603;PB.67976.2|m.196982;PB.70891.2|m.197687;PB.70891.3|m.200234;PB.72705.1|m.197331;PB.72858.1|m.37025;PB.72993.…	K14674+K07418+K08726+K18592+K01254+K05309+K15730+K00432
Nitrogen metabolism	21 (0.43%)	ko00910	PB.10693.1|m.174470;PB.13195.6|m.65766;PB.18245.2|m.147407;PB.26396.1|m.136700;PB.27042.1|m.137097;PB.2753.8|m.182096;PB.42810.2|m.15282;PB.43150.4|m.87342;PB.44155.1|m.17443;PB.44446.1|m.5064;PB.51404.2|m.7288;PB.51404.5|m.41982;PB.52322.1|m.90343;PB.56433.1|m.73837;PB.5961.15|m.136923;PB.62822.1|m.212633;PB.6809.1|m.182084;PB.73889.1|m.38189;PB.74099.1|m.182586;PB.74213.1|m.38170;PB.781.5|m.583…	K00284+K01915+K01455+K00262+K00264+K00261+K01674+K01725+K10534
Autophagy - other	20 (0.41%)	ko04136	PB.10251.1|m.179302;PB.13534.5|m.11359;PB.20012.1|m.147633;PB.20979.4|m.157979;PB.2872.8|m.181443;PB.3156.9|m.203766;PB.3949.2|m.215334;PB.45188.2|m.65267;PB.46938.2|m.10015;PB.4712.16|m.175070;PB.47283.2|m.65622;PB.47283.4|m.81501;PB.47969.14|m.73743;PB.48802.1|m.85196;PB.5111.3|m.25466;PB.52101.4|m.73431;PB.52319.2|m.45774;PB.52319.7|m.87039;PB.67882.1|m.212009;PB.75174.1|m.206833	K17908+K04382+K08343+K00914+K07204+K17906+K07203+K08333+K17606+K08266
Lysine biosynthesis	20 (0.41%)	ko00300	PB.1382.17|m.146747;PB.16770.4|m.98113;PB.17849.2|m.141679;PB.22172.4|m.57680;PB.28110.1|m.130637;PB.36667.5|m.117777;PB.40258.2|m.4196;PB.41281.1|m.21165;PB.44119.13|m.94052;PB.44119.4|m.12371;PB.45802.1|m.97117;PB.47580.5|m.183111;PB.48451.1|m.65;PB.48451.3|m.5491;PB.48451.5|m.63990;PB.48451.7|m.88624;PB.49737.11|m.216960;PB.49737.6|m.71162;PB.54748.6|m.187359;PB.66530.1|m.211375	K12524+K10206+K01714+K00928+K01586+K01778+K00133+K00215
RNA polymerase	20 (0.41%)	ko03020	PB.11931.1|m.162447;PB.2558.3|m.220143;PB.27728.12|m.69447;PB.30043.4|m.182771;PB.3118.22|m.94670;PB.3118.37|m.196843;PB.38809.1|m.102583;PB.3926.3|m.211045;PB.41630.1|m.16382;PB.42409.2|m.3310;PB.42410.2|m.2216;PB.42914.11|m.77499;PB.45159.1|m.1289;PB.45159.6|m.82934;PB.48511.2|m.33444;PB.67392.3|m.183139;PB.69424.4|m.181838;PB.7.8|m.92592;PB.73139.1|m.199407;PB.74058.1|m.184209	K03006+K03011+K03040+K03017+K03027+K03015+K03012+K03016
Vitamin B6 metabolism	20 (0.41%)	ko00750	PB.25432.1|m.9875;PB.31436.6|m.212504;PB.41694.1|m.2776;PB.41694.9|m.90980;PB.42544.1|m.60122;PB.45543.3|m.51080;PB.45543.6|m.217557;PB.4628.11|m.217132;PB.4628.2|m.7368;PB.4628.5|m.12128;PB.50271.8|m.188960;PB.51019.2|m.72892;PB.52951.10|m.89419;PB.53504.2|m.33568;PB.54374.4|m.67488;PB.54374.6|m.75822;PB.55520.2|m.40396;PB.56687.1|m.2660;PB.56779.1|m.2560;PB.58310.1|m.10529	K05275+K00275+K01733+K00831+K06215+K00868
Histidine metabolism	19 (0.39%)	ko00340	PB.10858.1|m.2528;PB.10858.4|m.12198;PB.21827.1|m.99906;PB.21827.2|m.101663;PB.24230.1|m.24956;PB.24834.11|m.150470;PB.24834.9|m.104927;PB.30415.1|m.132836;PB.30552.7|m.90567;PB.30552.8|m.129642;PB.36596.3|m.88354;PB.36596.4|m.106780;PB.39818.2|m.13434;PB.39818.4|m.14531;PB.42722.2|m.8176;PB.42722.4|m.66753;PB.45324.6|m.72872;PB.51183.1|m.13707;PB.66607.4|m.188218	K00128+K01814+K00013+K00817+K01663+K14085+K00765+K18649+K11755
Glycosaminoglycan degradation	18 (0.37%)	ko00531	PB.1318.33|m.118755;PB.13568.15|m.149604;PB.17609.3|m.110751;PB.18157.2|m.161201;PB.18773.1|m.144285;PB.20524.1|m.30707;PB.21622.2|m.151004;PB.21895.4|m.168657;PB.22103.1|m.25551;PB.22952.7|m.128864;PB.25825.1|m.146344;PB.26409.1|m.126332;PB.313.5|m.31909;PB.34603.3|m.41545;PB.3809.7|m.116717;PB.40278.2|m.91158;PB.59688.1|m.73107;PB.61426.1|m.44093	K12309+K01205+K07964+K12373
Monobactam biosynthesis	16 (0.33%)	ko00261	PB.1382.17|m.146747;PB.17849.2|m.141679;PB.22172.4|m.57680;PB.36667.5|m.117777;PB.40258.2|m.4196;PB.43720.3|m.58949;PB.45802.1|m.97117;PB.47020.1|m.13975;PB.48451.1|m.65;PB.48451.3|m.5491;PB.48451.5|m.63990;PB.48451.7|m.88624;PB.49737.11|m.216960;PB.49737.6|m.71162;PB.54748.6|m.187359;PB.66530.1|m.211375	K12524+K01714+K00928+K13811+K00133+K00215
ABC transporters	16 (0.33%)	ko02010	PB.10700.3|m.182352;PB.11220.3|m.158688;PB.14670.1|m.154628;PB.16159.1|m.160419;PB.24395.1|m.142293;PB.2538.2|m.31434;PB.2543.38|m.210053;PB.2543.3|m.26005;PB.26503.7|m.148841;PB.26536.1|m.125759;PB.2939.40|m.167316;PB.51079.1|m.6837;PB.53052.7|m.58360;PB.59710.1|m.36129;PB.6691.9|m.192660;PB.9322.19|m.138573	K05665+K05666+K05681+K05662+K05658+K05663+K05657+K05655
Ether lipid metabolism	16 (0.33%)	ko00565	PB.12876.7|m.144251;PB.15529.1|m.165685;PB.17119.2|m.133653;PB.20352.11|m.152633;PB.22287.1|m.161170;PB.2281.15|m.30387;PB.2281.17|m.31957;PB.23279.1|m.31693;PB.23937.1|m.145275;PB.38808.1|m.102148;PB.41096.2|m.78629;PB.41782.2|m.89390;PB.44170.2|m.13960;PB.48516.1|m.67876;PB.48516.2|m.82171;PB.49470.1|m.77972	K14674+K13510+K01115+K13519+K16860+K01114+K04628
Folate biosynthesis	16 (0.33%)	ko00790	PB.20581.4|m.61103;PB.30077.1|m.22866;PB.33396.6|m.126402;PB.36475.1|m.9411;PB.39751.2|m.15214;PB.4489.18|m.204209;PB.4489.5|m.92432;PB.46093.2|m.86605;PB.51859.7|m.184224;PB.56353.1|m.9840;PB.56711.2|m.61828;PB.60429.4|m.45336;PB.61138.1|m.47070;PB.72219.1|m.24277;PB.72271.1|m.27315;PB.73763.1|m.180623	K18482+K13998+K15376+K01930+K13941+K00011+K15631+K01307+K13950+K03637+K14652+K01633+K01724
Biotin metabolism	16 (0.33%)	ko00780	PB.14786.1|m.157014;PB.20197.1|m.10202;PB.24415.8|m.139556;PB.31667.7|m.73386;PB.3648.1|m.19306;PB.38451.1|m.16437;PB.41740.21|m.75136;PB.41740.5|m.15804;PB.42876.15|m.91665;PB.42876.20|m.196365;PB.44567.6|m.95190;PB.54793.3|m.65690;PB.56068.1|m.48429;PB.66271.1|m.23254;PB.67871.2|m.204203;PB.71724.1|m.28797	K19562+K09458+K00208+K00059+K02372
SNARE interactions in vesicular transport	16 (0.33%)	ko04130	PB.50540.1|m.89792;PB.50724.1|m.80540;PB.53247.2|m.29978;PB.54311.1|m.50522;PB.54780.4|m.204095;PB.58882.5|m.60923;PB.58918.1|m.5968;PB.58932.2|m.52633;PB.59557.5|m.193693;PB.59928.1|m.45674;PB.60059.1|m.31843;PB.62989.3|m.205206;PB.65367.1|m.38779;PB.66152.3|m.184574;PB.67632.2|m.51966;PB.68734.1|m.204986	K08492+K08488+K08486+K08493+K08496+K08506+K08495+K08517+K08515+K08498+K08516+K08503
Circadian rhythm - plant	15 (0.31%)	ko04712	PB.1172.5|m.42487;PB.11749.11|m.43617;PB.11749.30|m.82347;PB.18550.4|m.188528;PB.21209.4|m.157486;PB.24914.14|m.146864;PB.34616.7|m.83496;PB.40322.1|m.4340;PB.44995.1|m.81991;PB.48276.12|m.202157;PB.49245.14|m.196367;PB.51703.1|m.50977;PB.6274.13|m.155292;PB.6274.1|m.22524;PB.6592.6|m.128127	K12120+K03097+K12129+K12115+K03115+K00660+K12121+K12118
Ubiquinone and other terpenoid-quinone biosynthesis	15 (0.31%)	ko00130	PB.19557.5|m.142307;PB.3500.10|m.180435;PB.38543.1|m.101545;PB.39547.2|m.112930;PB.42973.2|m.66568;PB.44042.1|m.4767;PB.44876.1|m.80162;PB.45154.1|m.39260;PB.46058.1|m.12984;PB.46258.1|m.44041;PB.46972.14|m.192153;PB.62526.1|m.35629;PB.64659.1|m.52408;PB.67492.1|m.30360;PB.68612.3|m.202359	K09834+K06126+K14759+K01904+K00457+K00815+K12501+K06127+K12502+K03809
C5-Branched dibasic acid metabolism	14 (0.29%)	ko00660	PB.11411.7|m.30873;PB.13830.13|m.118748;PB.13830.3|m.14900;PB.15428.3|m.22993;PB.19904.5|m.145516;PB.23152.5|m.88437;PB.35645.8|m.97467;PB.35645.9|m.101425;PB.37868.2|m.38651;PB.39177.1|m.118498;PB.50268.1|m.2496;PB.55058.1|m.1370;PB.64335.4|m.198707;PB.6676.2|m.177252	K01652+K01653+K01703+K00052+K01704
Homologous recombination	14 (0.29%)	ko03440	PB.13904.1|m.140584;PB.15357.1|m.27686;PB.44167.8|m.209406;PB.46033.5|m.97847;PB.48666.1|m.15406;PB.54763.1|m.77756;PB.61016.1|m.36280;PB.63616.1|m.184092;PB.65356.1|m.211026;PB.67221.4|m.186365;PB.69029.3|m.184459;PB.73206.1|m.187474;PB.73306.1|m.198331;PB.74202.1|m.183994	K07466+K04728+K11864+K12173+K03553+K20776
Nicotinate and nicotinamide metabolism	14 (0.29%)	ko00760	PB.2498.8|m.112888;PB.35816.2|m.87386;PB.40231.6|m.105377;PB.40231.7|m.103769;PB.44596.9|m.80703;PB.47137.5|m.83238;PB.4821.1|m.171552;PB.48806.2|m.89948;PB.49673.1|m.8689;PB.50241.1|m.12917;PB.51453.1|m.58461;PB.56055.2|m.189637;PB.69157.1|m.184510;PB.69382.1|m.188262	K01950+K01081+K00763+K01513+K03426+K03787+K00767+K06210
Glycosphingolipid biosynthesis - ganglio series	13 (0.26%)	ko00604	PB.1318.33|m.118755;PB.13568.15|m.149604;PB.17609.3|m.110751;PB.18157.2|m.161201;PB.18773.1|m.144285;PB.20524.1|m.30707;PB.21895.4|m.168657;PB.22952.7|m.128864;PB.25825.1|m.146344;PB.313.5|m.31909;PB.3809.7|m.116717;PB.40278.2|m.91158;PB.59688.1|m.73107	K12309+K12373
Riboflavin metabolism	13 (0.26%)	ko00740	PB.36960.3|m.110502;PB.37562.1|m.101294;PB.39725.1|m.106316;PB.44596.9|m.80703;PB.47130.4|m.186349;PB.48806.2|m.89948;PB.57949.2|m.53826;PB.63178.1|m.212451;PB.63502.5|m.188543;PB.69157.1|m.184510;PB.69925.1|m.24730;PB.72219.1|m.24277;PB.72794.1|m.183564	K00953+K11752+K20884+K01513+K18453+K00794+K00793+K20860+K14652
Photosynthesis	13 (0.26%)	ko00195	PB.10012.1|m.168504;PB.10403.1|m.174398;PB.30021.2|m.133949;PB.3118.37|m.196843;PB.391.13|m.148043;PB.45769.1|m.1201;PB.45769.5|m.38482;PB.57847.1|m.64639;PB.579.13|m.68147;PB.62481.2|m.40524;PB.66860.2|m.45696;PB.69603.1|m.191243;PB.71759.5|m.195504	K02112+K02111+K02115+K02690+K02641+K02114+K02717+K02113+K02639
Thiamine metabolism	12 (0.24%)	ko00730	PB.10004.5|m.71191;PB.10004.6|m.90137;PB.10004.7|m.176152;PB.1821.1|m.3401;PB.30249.6|m.139602;PB.38814.4|m.202675;PB.43999.3|m.66237;PB.45196.1|m.70643;PB.50949.3|m.180471;PB.56453.1|m.37913;PB.63530.4|m.37717;PB.73413.1|m.39535	K04487+K03147+K14153+K03707+K00939+K06949+K03146+K00878+K20896
Linoleic acid metabolism	10 (0.2%)	ko00591	PB.12876.7|m.144251;PB.16211.4|m.184886;PB.17493.5|m.103041;PB.25909.1|m.50550;PB.28871.1|m.112930;PB.46001.3|m.80334;PB.7082.12|m.134694;PB.7082.13|m.148852;PB.7082.3|m.28578;PB.9163.2|m.174325	K14674+K07418+K07409+K00454+K15718
Basal transcription factors	10 (0.2%)	ko03022	PB.12689.1|m.175124;PB.1759.2|m.211470;PB.24941.4|m.189274;PB.45825.1|m.931;PB.48339.2|m.181473;PB.53596.5|m.212088;PB.54093.1|m.9480;PB.59739.1|m.72174;PB.64237.3|m.210346;PB.7321.1|m.180894	K14651+K03138+K03124+K06634+K03130+K03125
Base excision repair	10 (0.2%)	ko03410	PB.16838.1|m.145320;PB.3118.22|m.94670;PB.32279.10|m.188902;PB.46402.2|m.42973;PB.56154.10|m.211898;PB.56154.1|m.16712;PB.59276.3|m.195327;PB.63993.2|m.35343;PB.64062.1|m.46932;PB.8498.8|m.139312	K10747+K01142+K10803+K04802+K10563+K02326+K10569+K10798
Fatty acid elongation	10 (0.2%)	ko00062	PB.27648.1|m.38250;PB.35886.1|m.105883;PB.43693.2|m.8926;PB.45876.2|m.85911;PB.45896.6|m.184342;PB.52772.1|m.9506;PB.52772.3|m.54454;PB.56024.1|m.12016;PB.57352.4|m.202716;PB.64207.1|m.210315	K10258+K15397+K10251+K01068+K01074+K07512+K10703
Diterpenoid biosynthesis	10 (0.2%)	ko00904	PB.23879.2|m.98397;PB.42358.1|m.34310;PB.47630.2|m.12577;PB.56905.8|m.197280;PB.59243.1|m.32288;PB.59290.6|m.185901;PB.62041.1|m.45607;PB.63316.2|m.44362;PB.63861.3|m.194768;PB.66606.1|m.54302	K04121+K13070+K04124+K04125
Isoflavonoid biosynthesis	9 (0.18%)	ko00943	PB.25909.1|m.50550;PB.43887.2|m.13324;PB.44303.2|m.89215;PB.44660.11|m.90359;PB.45494.1|m.87340;PB.48481.1|m.91353;PB.58501.1|m.50891;PB.58501.3|m.74425;PB.62439.2|m.47768	K13260+K13264+K13263+K13258
Steroid biosynthesis	9 (0.18%)	ko00100	PB.12876.7|m.144251;PB.15550.3|m.162984;PB.1746.10|m.103002;PB.25003.1|m.138667;PB.37766.19|m.109972;PB.53737.7|m.189893;PB.64753.1|m.185546;PB.9008.4|m.59974;PB.9595.2|m.17031	K14674+K00213+K01853+K07748+K09828+K08242+K00559+K05917
Flavone and flavonol biosynthesis	7 (0.14%)	ko00944	PB.43254.1|m.5217;PB.43887.2|m.13324;PB.44660.11|m.90359;PB.44949.1|m.81798;PB.48435.1|m.16964;PB.51688.1|m.67216;PB.70526.1|m.192529	K22771+K13264
AGE-RAGE signaling pathway in diabetic complications	6 (0.12%)	ko04933	PB.22302.2|m.178712;PB.25593.1|m.148888;PB.32046.2|m.118910;PB.33230.1|m.4034;PB.4965.1|m.201608;PB.64251.1|m.38686	K04392+K05740+K05857
Glycosphingolipid biosynthesis - globo and isoglobo series	6 (0.12%)	ko00603	PB.35497.2|m.67313;PB.3809.7|m.116717;PB.38875.1|m.11037;PB.38875.8|m.126187;PB.40278.2|m.91158;PB.49168.2|m.15993	K07407+K12373
Anthocyanin biosynthesis	6 (0.12%)	ko00942	PB.43653.3|m.204696;PB.44303.2|m.89215;PB.44660.11|m.90359;PB.45398.1|m.20774;PB.48481.1|m.91353;PB.73188.1|m.196567	K12938+K21383
Other types of O-glycan biosynthesis	6 (0.12%)	ko00514	PB.11075.4|m.155819;PB.17386.2|m.28967;PB.40501.5|m.14156;PB.42714.4|m.60925;PB.42714.7|m.80714;PB.57847.1|m.64639	K09667+K20783+K20784
Sulfur relay system	5 (0.1%)	ko04122	PB.10004.5|m.71191;PB.10004.6|m.90137;PB.10004.7|m.176152;PB.30559.1|m.3556;PB.61138.1|m.47070	K04487+K01011+K03637
Caffeine metabolism	4 (0.08%)	ko00232	PB.16211.4|m.184886;PB.25909.1|m.50550;PB.3264.28|m.176766;PB.43716.2|m.189755	K07409+K00106+K00365
Glycosylphosphatidylinositol (GPI)-anchor biosynthesis	4 (0.08%)	ko00563	PB.14693.1|m.164641;PB.19543.4|m.55887;PB.26407.16|m.134359;PB.46073.4|m.82221	K03860+K05292+K05289+K05290
Synthesis and degradation of ketone bodies	4 (0.08%)	ko00072	PB.23273.10|m.79790;PB.23273.11|m.83738;PB.31774.1|m.329;PB.48032.1|m.6829	K00626+K01640
Taurine and hypotaurine metabolism	3 (0.06%)	ko00430	PB.20293.2|m.120167;PB.32233.13|m.90899;PB.39403.1|m.107735	K18592+K01580+K10712
Cutin, suberine and wax biosynthesis	3 (0.06%)	ko00073	PB.45535.1|m.91482;PB.46079.1|m.4074;PB.73069.1|m.27319	K20769+K15400+K17991
Phosphonate and phosphinate metabolism	3 (0.06%)	ko00440	PB.43649.1|m.8665;PB.44946.2|m.91740;PB.61832.1|m.69731	K00967+K00968
Glucosinolate biosynthesis	3 (0.06%)	ko00966	PB.35645.8|m.97467;PB.35645.9|m.101425;PB.39177.1|m.118498	K01703
Benzoxazinoid biosynthesis	3 (0.06%)	ko00402	PB.26121.7|m.34259;PB.47547.1|m.16591;PB.55478.1|m.58418	K13229
Sesquiterpenoid and triterpenoid biosynthesis	2 (0.04%)	ko00909	PB.35816.2|m.87386;PB.4821.1|m.171552	K14175
Monoterpenoid biosynthesis	2 (0.04%)	ko00902	PB.61968.2|m.202189;PB.62925.1|m.48037	K15095
Non-homologous end-joining	2 (0.04%)	ko03450	PB.72240.1|m.29480;PB.8694.1|m.195625	K10886+K10885
Zeatin biosynthesis	1 (0.02%)	ko00908	PB.48588.1|m.15602	K13495
Indole alkaloid biosynthesis	1 (0.02%)	ko00901	PB.40094.3|m.40940	K21026
