# Supplementary material for: Screening of Key Proteins Affecting Floral Initiation of Saffron Under Cold Stress Using iTRAQ-Based Proteomics
Source: Frontiers journal article supplement (doi:10.3389/fpls.2021.644934), 2021-05-11
Supplement: Table_5.XLS [file Table_5.XLS]

## Sheet: flower-VS-non-flower
Table S5. Pathway terms annotated across differentially expressed proteins.
#Pathway	Sample1 (170)	Pvalue	Pathway ID	Level1	Level2	Proteins	KOs
Starch and sucrose metabolism	17	8.24565e-06	ko00500	Metabolism	Carbohydrate metabolism	PB.229.41|m.137985;PB.1878.6|m.104960;PB.11585.3|m.159774;PB.2628.15|m.76320;PB.42470.2|m.97279;PB.23022.16|m.151042;PB.56187.1|m.75410;PB.41.13|m.144453;PB.9549.5|m.166077;PB.4393.22|m.133454;PB.25813.3|m.30630;PB.425.28|m.142376;PB.34450.1|m.24905;PB.425.38|m.170127;PB.42784.4|m.70714;PB.17182.20|m.162522;PB.33059.2|m.5150	K00695+K01835+K01214+K05350+K00975+K00688+K01188+K01187+K13679+K00700
Stilbenoid, diarylheptanoid and gingerol biosynthesis	7	1.49753e-05	ko00945	Metabolism	Biosynthesis of other secondary metabolites	PB.44899.2|m.23660;PB.44899.6|m.75488;PB.11021.13|m.186186;PB.47975.4|m.51259;PB.44899.8|m.88961;PB.40409.3|m.99138;PB.64326.1|m.31890	K16040+K00588
Glutathione metabolism	8	0.00933649	ko00480	Metabolism	Metabolism of other amino acids	PB.62685.1|m.5798;PB.58772.3|m.205851;PB.65315.2|m.40389;PB.61560.10|m.50648;PB.59531.1|m.15756;PB.13969.4|m.195018;PB.67025.2|m.56896;PB.58772.2|m.185008	K00799+K00434+K01256
Galactose metabolism	6	0.0241139	ko00052	Metabolism	Carbohydrate metabolism	PB.46318.1|m.11959;PB.35497.2|m.67313;PB.1878.6|m.104960;PB.9549.5|m.166077;PB.59688.1|m.73107;PB.25813.3|m.30630	K00850+K07407+K01835+K01187+K12309
Ribosome biogenesis in eukaryotes	5	0.0261777	ko03008	Genetic Information Processing	Translation	PB.9724.1|m.173755;PB.6040.1|m.181396;PB.11749.11|m.43617;PB.38871.20|m.198712;PB.1922.14|m.131171	K12619+K14568+K14565+K03097+K14563
Protein processing in endoplasmic reticulum	12	0.059035	ko04141	Genetic Information Processing	Folding, sorting and degradation	PB.65143.1|m.44717;PB.39155.5|m.9557;PB.22405.2|m.4928;PB.61082.3|m.209938;PB.73922.1|m.22000;PB.26665.2|m.23600;PB.9549.5|m.166077;PB.50517.9|m.65279;PB.2712.2|m.45792;PB.1644.27|m.90349;PB.62837.1|m.45691;PB.46142.1|m.17982	K13993+K09580+K08057+K03283+K05546+K14012+K07151+K09517
Phenylpropanoid biosynthesis	5	0.081224	ko00940	Metabolism	Biosynthesis of other secondary metabolites	PB.58660.2|m.66725;PB.2628.15|m.76320;PB.56187.1|m.75410;PB.40409.3|m.99138;PB.64326.1|m.31890	K00430+K05350+K01188+K00588
Cyanoamino acid metabolism	3	0.0973853	ko00460	Metabolism	Metabolism of other amino acids	PB.40309.3|m.18193;PB.2628.15|m.76320;PB.56187.1|m.75410	K00600+K05350+K01188
Spliceosome	9	0.0989062	ko03040	Genetic Information Processing	Transcription	PB.38978.3|m.196362;PB.6704.10|m.204033;PB.65157.2|m.42697;PB.592.4|m.169258;PB.10719.2|m.33441;PB.43424.8|m.67369;PB.26665.2|m.23600;PB.2712.2|m.45792;PB.58592.1|m.37305	K09564+K12885+K12876+K12818+K12813+K12893+K13025+K03283+K12741
Folate biosynthesis	2	0.104195	ko00790	Metabolism	Metabolism of cofactors and vitamins	PB.56711.2|m.61828;PB.60429.4|m.45336	K01307+K13950
Ribosome	10	0.143841	ko03010	Genetic Information Processing	Translation	PB.72182.1|m.188199;PB.41136.6|m.109460;PB.74195.3|m.179624;PB.4836.5|m.7441;PB.71200.4|m.190784;PB.66574.3|m.32813;PB.45498.1|m.91626;PB.70353.1|m.26079;PB.63829.2|m.30410;PB.59845.2|m.58787	K02873+K02989+K02910+K02930+K02868+K02918+K02941+K02996+K02934+K02987
Nitrogen metabolism	2	0.163336	ko00910	Metabolism	Energy metabolism	PB.51404.2|m.7288;PB.43150.4|m.87342	K01915+K00261
Isoquinoline alkaloid biosynthesis	2	0.175795	ko00950	Metabolism	Biosynthesis of other secondary metabolites	PB.40409.3|m.99138;PB.64326.1|m.31890	K21311
Other types of O-glycan biosynthesis	1	0.190691	ko00514	Metabolism	Glycan biosynthesis and metabolism	PB.11075.4|m.155819	K09667
Glycosphingolipid biosynthesis - globo and isoglobo series	1	0.190691	ko00603	Metabolism	Glycan biosynthesis and metabolism	PB.35497.2|m.67313	K07407
Amino sugar and nucleotide sugar metabolism	6	0.191116	ko00520	Metabolism	Carbohydrate metabolism	PB.25600.1|m.196;PB.1878.6|m.104960;PB.42470.2|m.97279;PB.56859.2|m.58942;PB.64414.2|m.50859;PB.42784.4|m.70714	K00966+K01835+K00975+K20547
Sphingolipid metabolism	2	0.213941	ko00600	Metabolism	Lipid metabolism	PB.35497.2|m.67313;PB.59688.1|m.73107	K07407+K12309
Ascorbate and aldarate metabolism	3	0.230752	ko00053	Metabolism	Carbohydrate metabolism	PB.58772.3|m.205851;PB.61560.10|m.50648;PB.58772.2|m.185008	K00434
Flavonoid biosynthesis	2	0.239784	ko00941	Metabolism	Biosynthesis of other secondary metabolites	PB.40409.3|m.99138;PB.64326.1|m.31890	K00588
N-Glycan biosynthesis	2	0.239784	ko00510	Metabolism	Glycan biosynthesis and metabolism	PB.9549.5|m.166077;PB.1644.27|m.90349	K05546+K07151
Pentose phosphate pathway	4	0.253394	ko00030	Metabolism	Carbohydrate metabolism	PB.46318.1|m.11959;PB.1878.6|m.104960;PB.689.1|m.36790;PB.51999.2|m.12801	K00850+K01835+K01783+K01623
Glycolysis / Gluconeogenesis	8	0.264462	ko00010	Metabolism	Carbohydrate metabolism	PB.46318.1|m.11959;PB.43801.1|m.742;PB.1878.6|m.104960;PB.19452.14|m.61143;PB.46661.1|m.6484;PB.15031.3|m.152839;PB.39810.9|m.111898;PB.51999.2|m.12801	K00850+K00134+K01835+K00121+K03103+K01913+K01623
Phagosome	4	0.292197	ko04145	Cellular Processes	Transport and catabolism	PB.36961.5|m.67768;PB.41514.7|m.82526;PB.22405.2|m.4928;PB.44513.3|m.82378	K07375+K08057
Alanine, aspartate and glutamate metabolism	3	0.296848	ko00250	Metabolism	Amino acid metabolism	PB.54310.2|m.64900;PB.51404.2|m.7288;PB.43150.4|m.87342	K13566+K01915+K00261
Fatty acid elongation	1	0.297262	ko00062	Metabolism	Lipid metabolism	PB.52772.1|m.9506	K07512
Diterpenoid biosynthesis	1	0.297262	ko00904	Metabolism	Metabolism of terpenoids and polyketides	PB.59243.1|m.32288	K13070
Base excision repair	1	0.297262	ko03410	Genetic Information Processing	Replication and repair	PB.32279.10|m.188902	K01142
Glycosphingolipid biosynthesis - ganglio series	1	0.367923	ko00604	Metabolism	Glycan biosynthesis and metabolism	PB.59688.1|m.73107	K12309
Phenylalanine metabolism	2	0.368632	ko00360	Metabolism	Amino acid metabolism	PB.40409.3|m.99138;PB.64326.1|m.31890	K00588
Carbon fixation in photosynthetic organisms	4	0.371551	ko00710	Metabolism	Energy metabolism	PB.43801.1|m.742;PB.19452.14|m.61143;PB.689.1|m.36790;PB.51999.2|m.12801	K00134+K01783+K01623
Proteasome	4	0.379509	ko03050	Genetic Information Processing	Folding, sorting and degradation	PB.44172.3|m.31520;PB.63129.2|m.36550;PB.42401.2|m.18578;PB.43584.6|m.87387	K06691+K02728+K03033+K03036
alpha-Linolenic acid metabolism	2	0.381163	ko00592	Metabolism	Lipid metabolism	PB.44789.2|m.89638;PB.70306.1|m.191564	K16818+K01723
C5-Branched dibasic acid metabolism	1	0.38987	ko00660	Metabolism	Carbohydrate metabolism	PB.23152.5|m.88437	K01653
Arginine biosynthesis	2	0.405902	ko00220	Metabolism	Amino acid metabolism	PB.51404.2|m.7288;PB.43150.4|m.87342	K01915+K00261
Circadian rhythm - plant	1	0.41106	ko04712	Organismal Systems	Environmental adaptation	PB.11749.11|m.43617	K03097
MAPK signaling pathway - plant	3	0.411326	ko04016	Environmental Information Processing	Signal transduction	PB.56187.1|m.75410;PB.56859.2|m.58942;PB.64414.2|m.50859	K20718+K20547
Fructose and mannose metabolism	3	0.429999	ko00051	Metabolism	Carbohydrate metabolism	PB.46318.1|m.11959;PB.25600.1|m.196;PB.51999.2|m.12801	K00850+K00966+K01623
RNA degradation	4	0.465808	ko03018	Genetic Information Processing	Folding, sorting and degradation	PB.46318.1|m.11959;PB.9724.1|m.173755;PB.8416.3|m.20381;PB.1922.14|m.131171	K00850+K12619+K04077
Glycosaminoglycan degradation	1	0.470337	ko00531	Metabolism	Glycan biosynthesis and metabolism	PB.59688.1|m.73107	K12309
Metabolic pathways	54	0.475447	ko01100	Metabolism	Global and overview maps	PB.46318.1|m.11959;PB.59243.1|m.32288;PB.52772.1|m.9506;PB.35497.2|m.67313;PB.42503.1|m.5539;PB.30452.8|m.43572;PB.43801.1|m.742;PB.229.41|m.137985;PB.25600.1|m.196;PB.1878.6|m.104960;PB.58660.2|m.66725;PB.19452.14|m.61143;PB.11585.3|m.159774;PB.40309.3|m.18193;PB.2628.15|m.76320;PB.42470.2|m.97279;PB.44789.2|m.89638;PB.46128.2|m.3911;PB.23022.16|m.151042;PB.55091.1|m.51904;PB.56187.1|m.75410;PB.…	K00850+K09841+K07512+K07407+K01251+K01569+K00134+K00695+K00966+K01835+K00430+K01214+K00600+K05350+K00975+K16818+K03953+K00688+K00306+K01188+K01653+K20547+K01783+K01256+K01187+K05546+K00417+K03006+K01723+K12309+K00121+K01900+K22588+K00588+K00058+K08081+K13679+K13832+K07151+K03103+K01915+K00261+K01913+K00700+K01623
mRNA surveillance pathway	3	0.493506	ko03015	Genetic Information Processing	Translation	PB.2342.6|m.94711;PB.65157.2|m.42697;PB.43424.8|m.67369	K14398+K12876+K13025
RNA polymerase	1	0.506521	ko03020	Genetic Information Processing	Transcription	PB.42410.2|m.2216	K03006
Glyoxylate and dicarboxylate metabolism	4	0.518537	ko00630	Metabolism	Carbohydrate metabolism	PB.30452.8|m.43572;PB.40309.3|m.18193;PB.51404.2|m.7288;PB.39810.9|m.111898	K01569+K00600+K01915+K01913
Tropane, piperidine and pyridine alkaloid biosynthesis	1	0.556239	ko00960	Metabolism	Biosynthesis of other secondary metabolites	PB.67424.1|m.210491	K08081
Butanoate metabolism	1	0.556239	ko00650	Metabolism	Carbohydrate metabolism	PB.23152.5|m.88437	K01653
Biosynthesis of secondary metabolites	30	0.565351	ko01110	Metabolism	Global and overview maps	PB.46318.1|m.11959;PB.59243.1|m.32288;PB.43801.1|m.742;PB.25600.1|m.196;PB.1878.6|m.104960;PB.58660.2|m.66725;PB.19452.14|m.61143;PB.11585.3|m.159774;PB.40309.3|m.18193;PB.2628.15|m.76320;PB.42470.2|m.97279;PB.44789.2|m.89638;PB.23022.16|m.151042;PB.56187.1|m.75410;PB.41.13|m.144453;PB.23152.5|m.88437;PB.689.1|m.36790;PB.70306.1|m.191564;PB.46661.1|m.6484;PB.43330.8|m.71202;PB.40409.3|m.99138;PB.…	K00850+K13070+K09841+K00134+K00966+K01835+K00430+K01214+K00600+K05350+K00975+K16818+K00688+K01188+K01653+K01783+K01723+K00121+K01900+K21311+K00588+K08081+K13679+K13832+K01913+K00700+K01623
Glycine, serine and threonine metabolism	3	0.593489	ko00260	Metabolism	Amino acid metabolism	PB.40309.3|m.18193;PB.55091.1|m.51904;PB.36411.3|m.106641	K00600+K00306+K00058
Carotenoid biosynthesis	1	0.600975	ko00906	Metabolism	Metabolism of terpenoids and polyketides	PB.59243.1|m.32288	K09841
Valine, leucine and isoleucine biosynthesis	1	0.641224	ko00290	Metabolism	Amino acid metabolism	PB.23152.5|m.88437	K01653
Biosynthesis of amino acids	10	0.644102	ko01230	Metabolism	Global and overview maps	PB.46318.1|m.11959;PB.43801.1|m.742;PB.19452.14|m.61143;PB.40309.3|m.18193;PB.23152.5|m.88437;PB.689.1|m.36790;PB.36411.3|m.106641;PB.42723.2|m.17343;PB.51404.2|m.7288;PB.51999.2|m.12801	K00850+K00134+K00600+K01653+K01783+K00058+K13832+K01915+K01623
One carbon pool by folate	1	0.665788	ko00670	Metabolism	Metabolism of cofactors and vitamins	PB.40309.3|m.18193	K00600
Other glycan degradation	1	0.677435	ko00511	Metabolism	Glycan biosynthesis and metabolism	PB.59688.1|m.73107	K12309
Pantothenate and CoA biosynthesis	1	0.688679	ko00770	Metabolism	Metabolism of cofactors and vitamins	PB.23152.5|m.88437	K01653
RNA transport	5	0.708767	ko03013	Genetic Information Processing	Translation	PB.65157.2|m.42697;PB.43424.8|m.67369;PB.47918.5|m.52947;PB.61420.2|m.38375;PB.49072.16|m.202318	K12876+K13025+K03257+K14319
Lysine degradation	1	0.710011	ko00310	Metabolism	Amino acid metabolism	PB.55091.1|m.51904	K00306
Inositol phosphate metabolism	1	0.748412	ko00562	Metabolism	Carbohydrate metabolism	PB.15031.3|m.152839	K03103
Plant hormone signal transduction	1	0.757195	ko04075	Environmental Information Processing	Signal transduction	PB.67903.1|m.31199	K14504
Phenylalanine, tyrosine and tryptophan biosynthesis	1	0.757195	ko00400	Metabolism	Amino acid metabolism	PB.42723.2|m.17343	K13832
Tyrosine metabolism	1	0.757195	ko00350	Metabolism	Amino acid metabolism	PB.46661.1|m.6484	K00121
Tryptophan metabolism	1	0.773855	ko00380	Metabolism	Amino acid metabolism	PB.44899.8|m.88961	K22588
Arginine and proline metabolism	1	0.796739	ko00330	Metabolism	Amino acid metabolism	PB.56066.4|m.58465	K01259
Glycerolipid metabolism	1	0.796739	ko00561	Metabolism	Lipid metabolism	PB.35497.2|m.67313	K07407
Peroxisome	2	0.805436	ko04146	Cellular Processes	Transport and catabolism	PB.55091.1|m.51904;PB.62862.1|m.30914	K00306+K11187
Carbon metabolism	10	0.810839	ko01200	Metabolism	Global and overview maps	PB.46318.1|m.11959;PB.43801.1|m.742;PB.19452.14|m.61143;PB.40309.3|m.18193;PB.689.1|m.36790;PB.46661.1|m.6484;PB.43330.8|m.71202;PB.36411.3|m.106641;PB.43150.4|m.87342;PB.51999.2|m.12801	K00850+K00134+K00600+K01783+K00121+K01900+K00058+K00261+K01623
Glycerophospholipid metabolism	1	0.829874	ko00564	Metabolism	Lipid metabolism	PB.44789.2|m.89638	K16818
Fatty acid degradation	1	0.847117	ko00071	Metabolism	Lipid metabolism	PB.46661.1|m.6484	K00121
Pentose and glucuronate interconversions	1	0.857635	ko00040	Metabolism	Carbohydrate metabolism	PB.689.1|m.36790	K01783
Propanoate metabolism	1	0.867433	ko00640	Metabolism	Carbohydrate metabolism	PB.43330.8|m.71202	K01900
Purine metabolism	2	0.922998	ko00230	Metabolism	Nucleotide metabolism	PB.1878.6|m.104960;PB.42410.2|m.2216	K01835+K03006
Oxidative phosphorylation	2	0.922998	ko00190	Metabolism	Energy metabolism	PB.46128.2|m.3911;PB.74094.2|m.24464	K03953+K00417
Endocytosis	2	0.92521	ko04144	Cellular Processes	Transport and catabolism	PB.26665.2|m.23600;PB.2712.2|m.45792	K03283
Pyrimidine metabolism	1	0.927778	ko00240	Metabolism	Nucleotide metabolism	PB.42410.2|m.2216	K03006
Aminoacyl-tRNA biosynthesis	1	0.930317	ko00970	Genetic Information Processing	Translation	PB.39880.10|m.94054	K01893
2-Oxocarboxylic acid metabolism	1	0.949525	ko01210	Metabolism	Global and overview maps	PB.23152.5|m.88437	K01653
Fatty acid metabolism	1	0.949525	ko01212	Metabolism	Global and overview maps	PB.52772.1|m.9506	K07512
Cysteine and methionine metabolism	1	0.975402	ko00270	Metabolism	Amino acid metabolism	PB.42503.1|m.5539	K01251
Citrate cycle (TCA cycle)	1	0.977922	ko00020	Metabolism	Carbohydrate metabolism	PB.43330.8|m.71202	K01900
Pyruvate metabolism	1	0.992262	ko00620	Metabolism	Carbohydrate metabolism	PB.39810.9|m.111898	K01913
