# Supplementary material for: Screening of Key Proteins Affecting Floral Initiation of Saffron Under Cold Stress Using iTRAQ-Based Proteomics
Source: Frontiers journal article supplement (doi:10.3389/fpls.2021.644934), 2021-05-11
Supplement: Table_6.XLS [file Table_6.XLS]

## Sheet: flower-VS-non-flower.kog2protei
Table S6. KOG analysis between flowering and non-flowering saffron crocus in present work.
Code	Functional-Categories	Family	Protein-Number	Proteins
A	RNA processing and modification	INFORMATION STORAGE AND PROCESSING	14	PB.61420.2|m.38375;PB.38978.3|m.196362;PB.10719.2|m.33441;PB.881.3|m.8018;PB.592.4|m.169258;PB.4836.5|m.7441;PB.2193.1|m.4910;PB.38871.20|m.198712;PB.32171.1|m.10105;PB.36509.3|m.13842;PB.6704.10|m.204033;PB.7658.5|m.128490;PB.6040.1|m.181396;PB.65157.2|m.42697
B	Chromatin structure and dynamics	INFORMATION STORAGE AND PROCESSING	3	PB.74419.1|m.36636;PB.63855.1|m.176461;PB.46203.1|m.23659
C	Energy production and conversion	METABOLISM	5	PB.43330.8|m.71202;PB.45911.2|m.79805;PB.46128.2|m.3911;PB.74094.2|m.24464;PB.52772.1|m.9506
E	Amino acid transport and metabolism	METABOLISM	7	PB.23152.5|m.88437;PB.40309.3|m.18193;PB.54310.2|m.64900;PB.55091.1|m.51904;PB.51404.2|m.7288;PB.43150.4|m.87342;PB.36411.3|m.106641
G	Carbohydrate transport and metabolism	METABOLISM	18	PB.59531.1|m.15756;PB.1878.6|m.104960;PB.51999.2|m.12801;PB.46318.1|m.11959;PB.41.13|m.144453;PB.2628.15|m.76320;PB.35497.2|m.67313;PB.9549.5|m.166077;PB.45911.2|m.79805;PB.43801.1|m.742;PB.19452.14|m.61143;PB.38385.17|m.198491;PB.17182.20|m.162522;PB.11075.4|m.155819;PB.689.1|m.36790;PB.11585.3|m.159774;PB.23022.16|m.151042;PB.25813.3|m.30630
H	Coenzyme transport and metabolism	METABOLISM	3	PB.42503.1|m.5539;PB.44871.3|m.57408;PB.56711.2|m.61828
I	Lipid transport and metabolism	METABOLISM	3	PB.44789.2|m.89638;PB.39810.9|m.111898;PB.70306.1|m.191564
J	Translation, ribosomal structure and biogenesis	INFORMATION STORAGE AND PROCESSING	20	PB.41136.6|m.109460;PB.43424.8|m.67369;PB.70353.1|m.26079;PB.45498.1|m.91626;PB.39880.10|m.94054;PB.58592.1|m.37305;PB.20589.3|m.128686;PB.10719.2|m.33441;PB.59845.2|m.58787;PB.68696.2|m.195218;PB.72182.1|m.188199;PB.66574.3|m.32813;PB.3052.1|m.208391;PB.63829.2|m.30410;PB.71200.4|m.190784;PB.1045.1|m.211069;PB.6040.1|m.181396;PB.65157.2|m.42697;PB.74195.3|m.179624;PB.25692.1|m.150145
K	Transcription	INFORMATION STORAGE AND PROCESSING	3	PB.52772.1|m.9506;PB.74572.2|m.186558;PB.52694.2|m.74526
L	Replication, recombination and repair	INFORMATION STORAGE AND PROCESSING	1	PB.32279.10|m.188902
M	Cell wall/membrane/envelope biogenesis	CELLULAR PROCESSES AND SIGNALING	8	PB.25600.1|m.196;PB.9549.5|m.166077;PB.425.38|m.170127;PB.425.28|m.142376;PB.42784.4|m.70714;PB.4393.22|m.133454;PB.42470.2|m.97279;PB.229.41|m.137985
O	Posttranslational modification, protein turnover, chaperones	CELLULAR PROCESSES AND SIGNALING	39	PB.39155.5|m.9557;PB.8416.3|m.20381;PB.52582.1|m.9752;PB.63129.2|m.36550;PB.38978.3|m.196362;PB.24543.20|m.102744;PB.22405.2|m.4928;PB.44871.3|m.57408;PB.40823.13|m.202859;PB.62837.1|m.45691;PB.9549.5|m.166077;PB.2712.2|m.45792;PB.26665.2|m.23600;PB.67025.2|m.56896;PB.62685.1|m.5798;PB.53269.1|m.13421;PB.67503.1|m.49012;PB.42401.2|m.18578;PB.21233.1|m.171924;PB.1644.27|m.90349;PB.53020.1|m.54110;…
P	Inorganic ion transport and metabolism	METABOLISM	1	PB.65320.1|m.29008
Q	Secondary metabolites biosynthesis, transport and catabolism	METABOLISM	4	PB.40409.3|m.99138;PB.64326.1|m.31890;PB.70306.1|m.191564;PB.46661.1|m.6484
R	General function prediction only	POORLY CHARACTERIZED	33	PB.46255.5|m.194415;PB.47796.16|m.74405;PB.44899.2|m.23660;PB.64414.2|m.50859;PB.67424.1|m.210491;PB.38978.3|m.196362;PB.59688.1|m.73107;PB.44899.6|m.75488;PB.47975.4|m.51259;PB.58592.1|m.37305;PB.43374.1|m.15799;PB.22009.9|m.57422;PB.10719.2|m.33441;PB.71919.1|m.30618;PB.881.3|m.8018;PB.1448.15|m.187516;PB.226.38|m.173128;PB.59243.1|m.32288;PB.56187.1|m.75410;PB.56859.2|m.58942;PB.2193.1|m.4910;…
S	Function unknown	POORLY CHARACTERIZED	4	PB.61420.2|m.38375;PB.20980.1|m.163943;PB.71919.1|m.30618;PB.49033.3|m.16904
T	Signal transduction mechanisms	CELLULAR PROCESSES AND SIGNALING	9	PB.61420.2|m.38375;PB.73253.2|m.179444;PB.42401.2|m.18578;PB.226.38|m.173128;PB.11075.4|m.155819;PB.43584.6|m.87387;PB.48245.3|m.53775;PB.44172.3|m.31520;PB.32779.1|m.19653
U	Intracellular trafficking, secretion, and vesicular transport	CELLULAR PROCESSES AND SIGNALING	4	PB.558.64|m.161205;PB.13003.11|m.163730;PB.59884.6|m.205148;PB.25692.1|m.150145
Y	Nuclear structure	CELLULAR PROCESSES AND SIGNALING	3	PB.61420.2|m.38375;PB.50517.9|m.65279;PB.13003.11|m.163730
Z	Cytoskeleton	CELLULAR PROCESSES AND SIGNALING	3	PB.36961.5|m.67768;PB.44513.3|m.82378;PB.41514.7|m.82526
